# Supplementary material for: Electrochemically driven hydrophosphination of alkenes and alkynes with diphenylphosphine
Source: Royal Society of Chemistry journal article supplement (doi:10.1039/d5ob00764j), 2025-01-01
Supplement: d5ob00764j1.pdf [file d5ob00764j1.pdf]

## *Supporting Information*

### **Electrochemically Driven Hydrophosphination of Alkenes and Alkynes with diphenylphosphine**

Xichen Zhang, Fuhui Zhao, Hui Qiu, Fei Xue\* and Mengtao Ma\*

Department of Chemistry and Materials Science, College of Science, Nanjing Forestry University, Nanjing 210037, China.

\*Email: [xuefei@njfu.edu.cn](mailto:xuefei@njfu.edu.cn); [mengtao@njfu.edu.cn](mailto:mengtao@njfu.edu.cn);

#### **Table of Contents**

|                                                                              |            |
|------------------------------------------------------------------------------|------------|
| <b>1. General Information .....</b>                                          | <b>S1</b>  |
| <b>2. Screening of partial reaction conditions.....</b>                      | <b>S1</b>  |
| <b>3. General procedure for the hydrophosphination of alkynes .....</b>      | <b>S2</b>  |
| <b>4. General procedure for the hydrophosphination of alkenes.....</b>       | <b>S3</b>  |
| <b>5. Gram-scale hydrophosphination of phenylacetylene and styrene .....</b> | <b>S3</b>  |
| <b>6. Product transformations .....</b>                                      | <b>S4</b>  |
| <b>7. Reaction with diene substrate .....</b>                                | <b>S5</b>  |
| <b>8. Mechanistic Studies.....</b>                                           | <b>S8</b>  |
| <b>9. Spectroscopic Data of Products .....</b>                               | <b>S10</b> |
| <b>10. Spectra of prepared compounds .....</b>                               | <b>S24</b> |
| <b>11. References .....</b>                                                  | <b>S75</b> |

## 1. General information

All air-sensitive compounds were handled using standard Schlenk-line or glove box techniques under high-purity nitrogen.  $^1\text{H}$  and  $^{31}\text{P}\{^1\text{H}\}$  NMR spectra were recorded at 25 °C on Bruker Avance III spectrometers (600 or 400 MHz) in deuterated solvents, with chemical shifts calibrated using  $\text{CDCl}_3$  as an internal standard. The abbreviations used to denote the multiplicities are as follows: s = singlet, d = doublet, t = triplet, q = quartet, m = multiplet, br = broad. Electrolysis experiments were conducted using a CHI 760E potentiostat (Shanghai Chenhua), and cyclic voltammograms were obtained on the same instrument. All reagents and solvents were used as received without further purification unless otherwise stated.

## 2. Screening of partial reaction conditions

Table S1 Optimization of  $\text{HPPH}_2$  in electrochemical hydrophosphination of alkene.

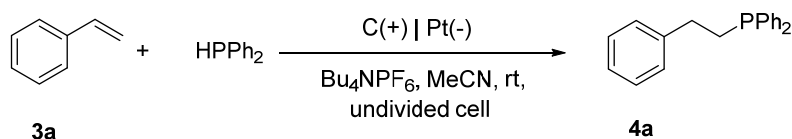

| Entry | HPPH <sub>2</sub> | Time | Conversion <sup>a</sup> |
|-------|-------------------|------|-------------------------|
| 1     | 1.0               | 8 h  | 45%                     |
| 2     | 1.2               | 8 h  | 65%                     |
| 3     | 1.5               | 8 h  | 63%                     |
| 4     | 1.2               | 5 h  | 60%                     |
| 5     | 1.2               | 6 h  | 61%                     |
| 6     | 1.2               | 7 h  | 84%(72% <sup>p</sup> )  |
| 7     | 1.2               | 7 h  | 37% <sup>c</sup>        |
| 8     | 1.2               | 7 h  | 44% <sup>d</sup>        |
| 9     | 1.5               | 7 h  | 26% <sup>e</sup>        |
| 10    | 1.5               | 7 h  | 64% <sup>f</sup>        |
| 11    | 1.5               | 7 h  | 28% <sup>g</sup>        |
| 12    | 1.5               | 7 h  | trace <sup>h</sup>      |

<sup>a</sup> Conversion was determined by  $^1\text{H}$  NMR spectroscopy. <sup>b</sup> isolated yield. <sup>c</sup>  $I = 5 \text{ mA}$ , <sup>d</sup>  $I = 15 \text{ mA}$ , <sup>e</sup>  $\text{Et}_4\text{NBF}_4$  as the supporting electrolyte. <sup>f</sup>  $n\text{Bu}_4\text{NBF}_4$  as the supporting electrolyte. <sup>g</sup>  $\text{CH}_3\text{OH}$  as the solvent. <sup>h</sup> THF as the solvent.

**Table S2 Optimization of the reaction conditions.**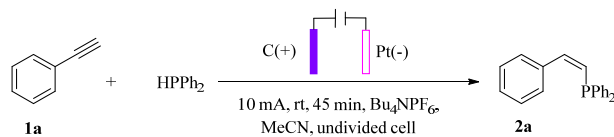

| Entry | Variation from the reaction conditions | Conversion <sup>a</sup> |
|-------|----------------------------------------|-------------------------|
| 1     | None                                   | 91%(80% <sup>b</sup> )  |
| 2     | No electric current                    | 0%                      |
| 3     | C(+) C(-) instead of C(+) Pt(-)        | 68%                     |
| 4     | Pt(+) Pt(-) instead of C(+) Pt(-)      | 76%                     |
| 5     | SST(+) SST(-) instead of C(+) Pt(-)    | 36%                     |
| 6     | Air instead of N <sub>2</sub>          | 0%                      |

<sup>a</sup> Reaction conditions: **1a** (0.5 mmol), HPPPh<sub>2</sub> (0.75 mmol), <sup>a</sup>Bu<sub>4</sub>NPF<sub>6</sub> (0.5 mmol), I = 10 mA, MeCN (3.0 mL), N<sub>2</sub>, rt, 45 min, isolated yield. Conversion was determined by <sup>1</sup>H NMR spectroscopy. <sup>b</sup> isolated yield.

**Table S3 Optimization of the reaction conditions.**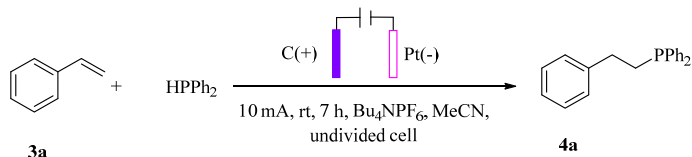

| Entry | Variation from the reaction conditions | Conversion <sup>a</sup> |
|-------|----------------------------------------|-------------------------|
| 1     | None                                   | 84%(72% <sup>b</sup> )  |
| 2     | No electric current                    | 0%                      |
| 3     | C(+) C(-) instead of C(+) Pt(-)        | 40%                     |
| 4     | Pt(+) Pt(-) instead of C(+) Pt(-)      | 19%                     |
| 5     | C(+) Ni(-) instead of C(+) Pt(-)       | 27%                     |
| 6     | Air instead of N <sub>2</sub>          | 0%                      |

<sup>a</sup> Reaction conditions: **3a** (0.5 mmol), HPPPh<sub>2</sub> (0.6 mmol), <sup>a</sup>Bu<sub>4</sub>NPF<sub>6</sub> (0.5 mmol), I = 10 mA, MeCN (3.0 mL), N<sub>2</sub>, rt, 45 min, isolated yield. Conversion was determined by <sup>1</sup>H NMR spectroscopy. <sup>b</sup> isolated yield.

### 3. General procedure for the hydrophosphination of alkynes

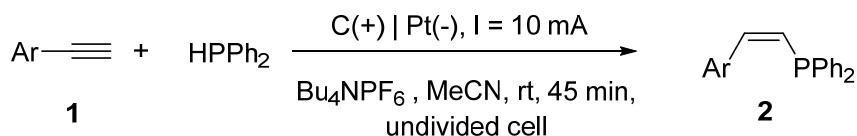

In a 10 mL over-dried three-necked flask equipped with a magnetic stir bar, alkyne (0.5 mmol), HPPPh<sub>2</sub> (130 μL, 0.75 mmol), Bu<sub>4</sub>NPF<sub>6</sub> (193.7 mg, 0.5 mmol) and MeCN

(3.0 mL) were added, respectively. The flask was equipped with graphite felt electrode ( $10 \times 10 \times 3 \text{ mm}^3$ ) as the anode and platinum plate ( $10 \times 10 \times 0.10 \text{ mm}^3$ ) as the cathode. The mixture was stirred for 45 min under a continuous current of 10 mA at room temperature.

#### 4. General procedure for the hydrophosphination of alkenes

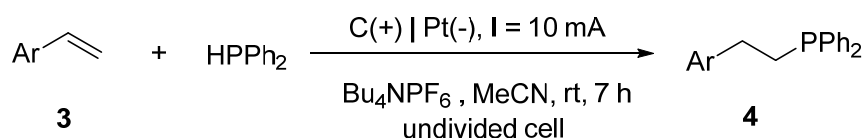

In a 10 mL over-dried three-necked flask equipped with a magnetic stir bar, alkene (0.5 mmol), HPPH<sub>2</sub> (87  $\mu\text{L}$ , 0.6 mmol), Bu<sub>4</sub>NPF<sub>6</sub> (193.7 mg, 0.5 mmol) and MeCN (3.0 mL) were added, respectively. The flask was equipped with graphite felt electrode ( $10 \times 10 \times 3 \text{ mm}^3$ ) as the anode and platinum plate ( $10 \times 10 \times 0.10 \text{ mm}^3$ ) as the cathode. The mixture was stirred for 7 h under a continuous current of 10 mA at room temperature.

#### 5. Gram-scale hydrophosphination of phenylacetylene and styrene

(A) Gram-scale experiment of phenylacetylene

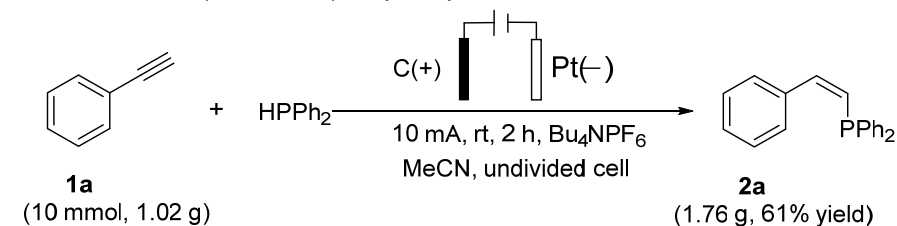

(B) Gram-scale experiment of styrene

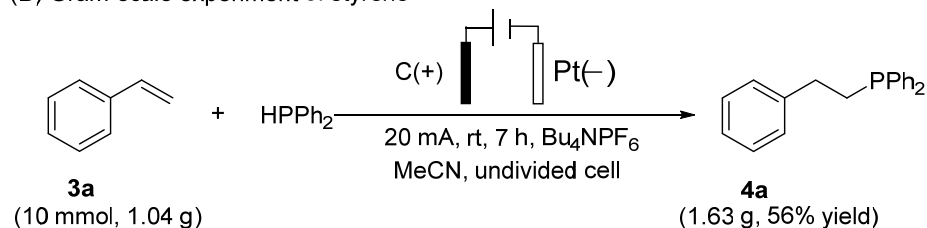

(C) The conversion of vinylphosphines

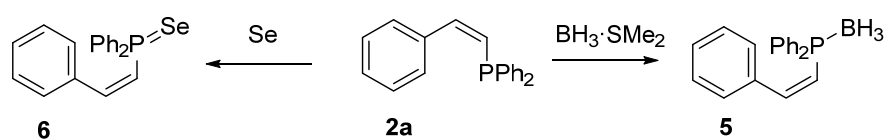

In a 25 mL over-dried flask equipped with a magnetic stirbar, phenylacetylene or styrene (10 mmol), HPPh<sub>2</sub> (2.6 mL, 15 mmol), Bu<sub>4</sub>NPF<sub>6</sub> (1.94 g, 10 mmol) and MeCN (10 mL) were added, respectively. The flask was equipped with graphite felt electrode (15 × 15 × 3 mm<sup>3</sup>) as the anode and platinum plate (15 × 15 × 0.10 mm<sup>3</sup>) as the cathode. The alkyne mixture was stirred for 2 h under a continuous current of 10 mA at room temperature. The alkenylphosphine products (1.76 g, 61% yield) was obtained by flash column chromatography on silica gel with ethyl acetate/petroleum ether as eluents. The alkene mixture was stirred for 7 h under a continuous current of 20 mA at room temperature. The alkylphosphine products (1.63 g, 56% yield) was obtained by flash column chromatography on silica gel with ethyl acetate/petroleum ether as eluents.

## 6. Product transformations

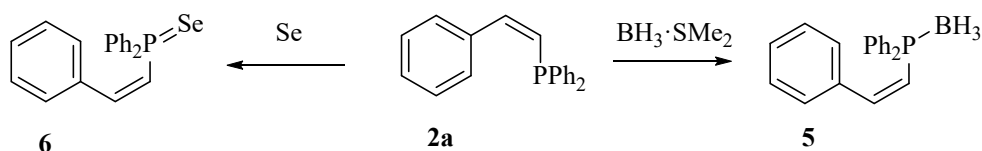

Se powder (15.8 mg, 0.2 mmol, for **2a-Se**) or BH<sub>3</sub>·SMe<sub>2</sub> (20 μL, 0.2 mmol, 10 M in Me<sub>2</sub>S, for **2a-BH<sub>3</sub>**) were added to 5 mL flask containing **2a** (57.6 mg, 0.2 mmol) and 3.0 mL CH<sub>3</sub>CN. The mixture was stirred 0.5 h at room temperature. The reaction mixture was subjected directly to preparative thin-layer chromatography purification to afford the corresponding product **5** (82% yield) and **6** (86% yield).

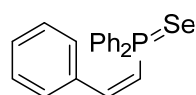

### (Z)-diphenyl(styryl)phosphine selenide (**6**)

The crude material was purified by flash column chromatography (silica gel, petroleum ether/ethyl acetate) to give **4** (63.6 mg, 86% yield). <sup>1</sup>H NMR (600 MHz, CDCl<sub>3</sub>): δ 7.93 – 7.89 (m, 4H), 7.52 – 7.46 (m, 3H), 7.37 – 7.28 (m, 5H), 7.07 – 7.03 (m, 2H), 6.46 (d, *J* = 18.0, 13.4 Hz, 1H). <sup>13</sup>C{<sup>1</sup>H} NMR (151 MHz, CDCl<sub>3</sub>): δ 145.9 (d, *J* = 2.7 Hz), 134.3 (d, *J* = 6.7 Hz), 131.8 (d, *J* = 10.9 Hz), 131.3 (d, *J* = 3.1 Hz), 130.2, 128.8, 128.4, 127.5, 122.3, 121.8. <sup>31</sup>P{<sup>1</sup>H} NMR (243 MHz, CDCl<sub>3</sub>): δ 20.1. HRMS (ESI): [M+H]<sup>+</sup> 369.0311, found 365.0316.

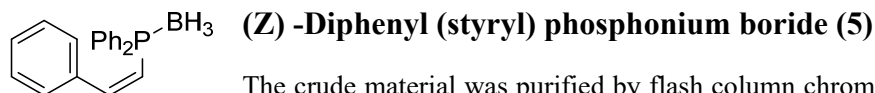

The crude material was purified by flash column chromatography (silica gel, petroleum ether/ethyl acetate) to give **5** (49.6 mg, 82% yield).  $^1\text{H}$  NMR (600 MHz,  $\text{CDCl}_3$ ):  $\delta$  7.74 – 7.71 (m, 4H), 7.62 – 7.54 (m, 2H), 7.41 – 7.27 (m, 8H), 7.10 – 7.05 (m, 3H), 6.21 (t,  $J$  = 12.9 Hz, 1H), 1.59 – 1.13 (m, 3H).  $^{13}\text{C}\{^1\text{H}\}$  NMR (151 MHz,  $\text{CDCl}_3$ ):  $\delta$  147.4, 134.8 (d,  $J$  = 5.2 Hz), 132.4 (d,  $J$  = 9.2 Hz), 131.0 (d,  $J$  = 1.8 Hz), 129.5, 129.4, 128.6, 127.6, 119.9, 119.6.  $^{31}\text{P}\{^1\text{H}\}$  NMR (243 MHz,  $\text{CDCl}_3$ ):  $\delta$  10.8 (d,  $J$  = 67.1 Hz). HRMS (ESI):  $[\text{M}+\text{H}]^+$  303.1474, found 303.1467.

## 7. Reaction with diene substrate

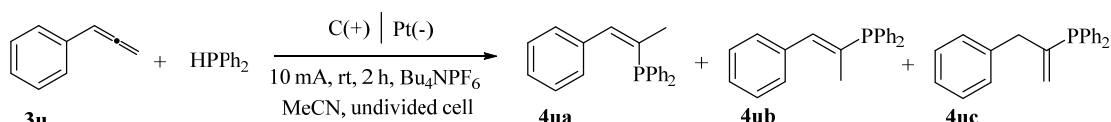

When **3u** as substrate, 68% isolated yield (**4ua**:**4ub**:**4uc**=90:1:9) of hydrophosphinated mixture products was obtained. Signals belonging to the product **4ua** are denoted with ●, product **4ub** are denoted with ●, **4uc** are denoted with ●.

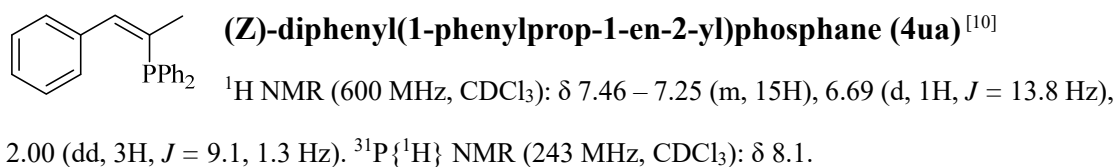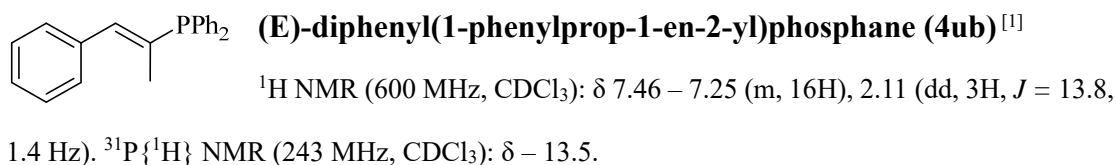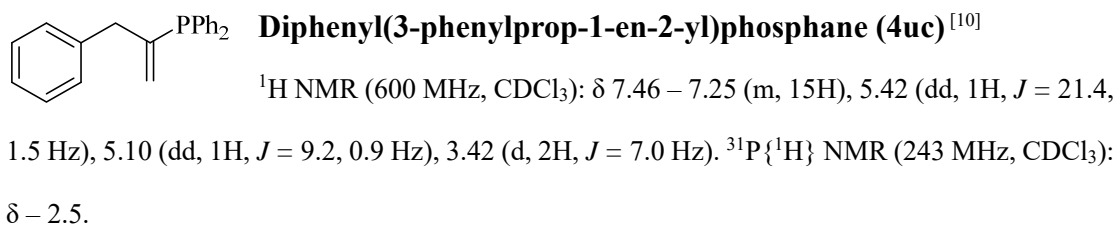

$^1\text{H}$  NMR

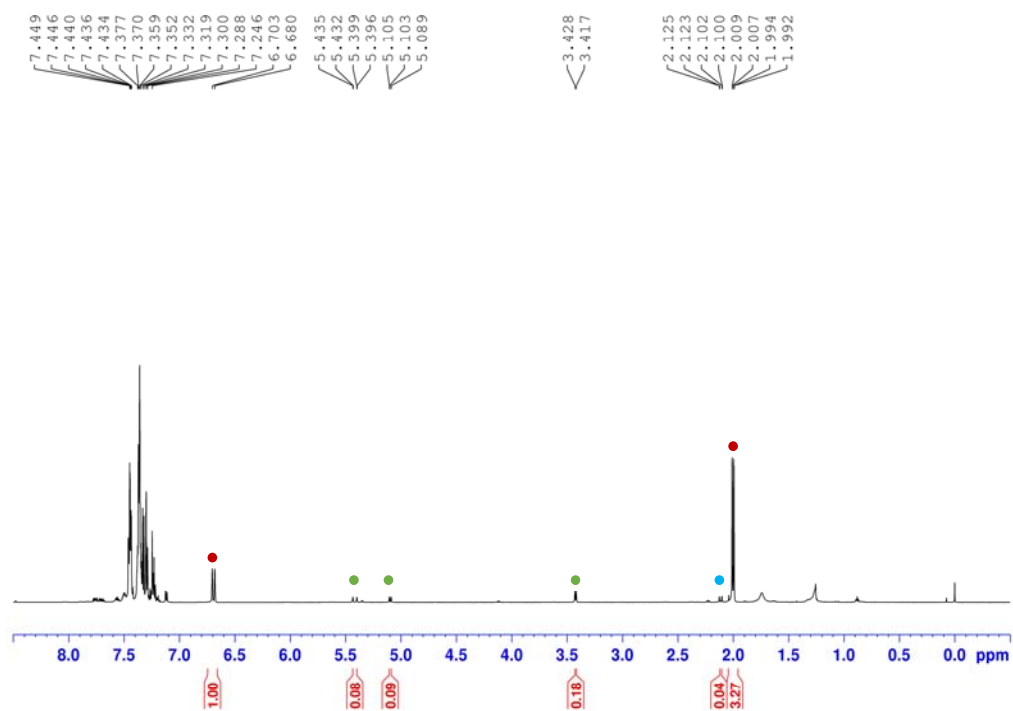

$^{31}\text{P}\{^1\text{H}\}$  NMR

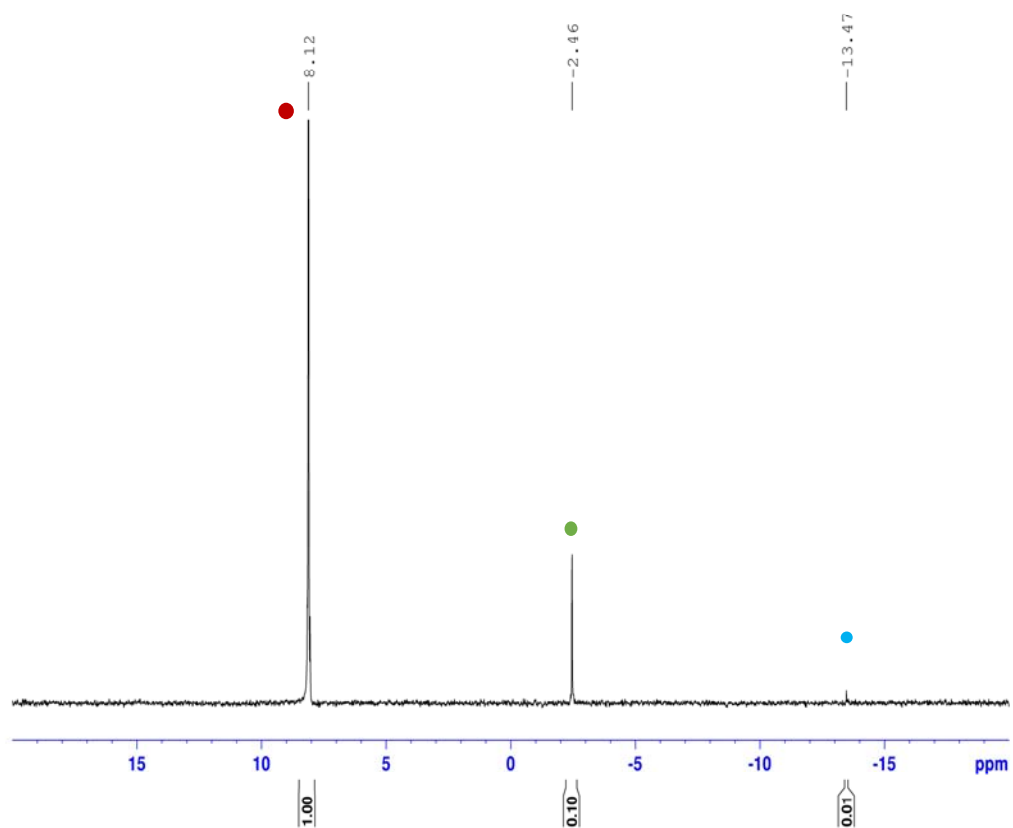

## 8. Mechanistic Studies

### I. Control experiment

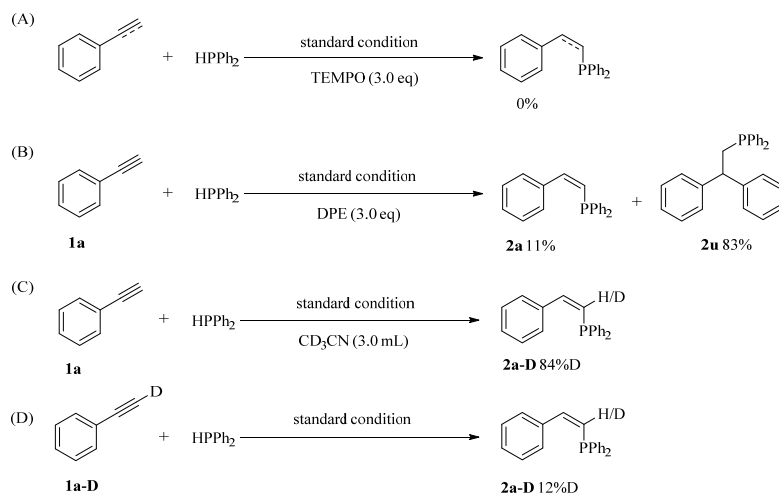

In a 10 mL over-dried three-necked flask equipped with a magnetic stir bar, phenylacetylene or styrene (0.5 mmol), HPPH<sub>2</sub> (0.75 or 0.6 mmol), Bu<sub>4</sub>NPF<sub>6</sub> (0.5 mmol), TEMPO (1.5 mmol) and MeCN (3.0 mL) were added, respectively. The flask was equipped with graphite felt electrode (10 × 10 × 3 mm<sup>3</sup>) as the anode and platinum plate (10 × 10 × 0.10 mm<sup>3</sup>) as the cathode. The mixture was stirred for 45 min or 7 h under a continuous current of 10 mA at room temperature. The reaction was completely suppressed. The addition of DPE to the phenylacetylene model reaction enabled the isolation and purification of the the radical trapping product **2u** (Conversion 83%). When deuterated acetonitrile was used in the template reaction, the deuterium incorporation rate was 84%, while when deuterated phenylacetylene is used as substrate, the deuteration rate is only 12%, indicating that most of the hydrogen in the product came from acetonitrile.

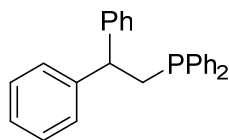

#### (2,2-diphenylethyl)diphenylphosphane (**2u**)

Electrolysis was conducted following the general procedure. The crude material was purified by flash column chromatography (silica gel, petroleum ether/ethyl acetate) to give **2u** (128.2 mg, 70% yield).

<sup>1</sup>H NMR (600 MHz, CDCl<sub>3</sub>): δ 7.47 – 7.44 (m, 4H), 7.37 – 7.36 (m, 6H), 7.33 – 7.30 (m, 4H), 7.29



– 7.21 (m, 6H), 4.03 – 3.98 (m, 1H), 2.91 – 2.89 (m, 2H).  $^{31}\text{P}\{^1\text{H}\}$  NMR (243 MHz,  $\text{CDCl}_3$ ):  $\delta$  – 20.8.

Spectroscopic data matches that reported in the literature [9].

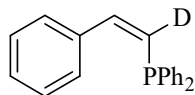

### (Z)-diphenyl(2-phenylvinyl-1-d)phosphane (2a-D)

On 0.5 mmol scale. Electrolysis was conducted following the general procedure. The crude material was purified by flash column chromatography (silica gel, petroleum ether/ethyl acetate) to give **2a-D** (94.0 mg, 63% yield).

$^1\text{H}$  NMR (600 MHz,  $\text{CDCl}_3$ ):  $\delta$  7.51 – 7.50 (m, 2H), 7.45 – 7.43 (m, 4H), 7.33 – 7.23 (m, 10H).

$^{31}\text{P}\{^1\text{H}\}$  NMR (243 MHz,  $\text{CDCl}_3$ ):  $\delta$  – 25.2.

## II. Procedures for cyclic voltammetry (CV)

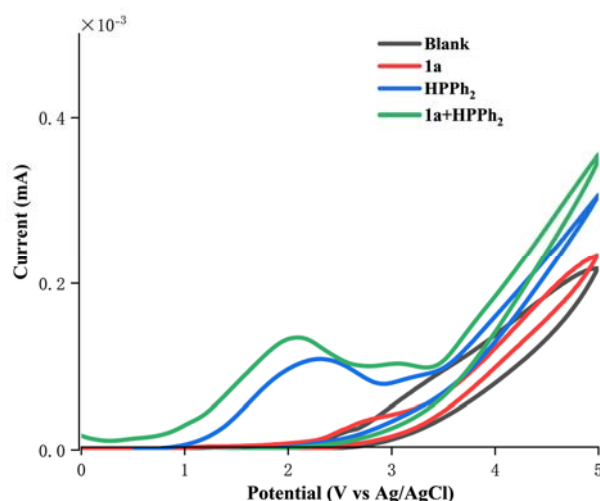

**Fig S1.** Cyclic voltammetry measurements.

Cyclic voltammetry experiments were conducted in a 25 mL three-electrode cell equipped with a glassy carbon working electrode, an Ag/AgCl reference electrode submerged in saturated aqueous KCl, and a platinum wire counter electrode. All experiments were performed at a scan rate of  $100 \text{ mV s}^{-1}$  in MeCN containing 0.1 M  $\text{Bu}_4\text{NPF}_6$  as the supporting electrolyte. The potential range was set to –5 to 5 V, and the following systems were studied: Background electrolyte ( $\text{Bu}_4\text{NPF}_6$ , 0.1 M in MeCN);  $\text{HPPH}_2$  (0.1 M in MeCN); Phenylacetylene (0.1 M in MeCN); A mixture of

phenylacetylene (0.1 M in MeCN) and HPPH<sub>2</sub> (0.1 M in MeCN). Currents and potentials were reported in mA and V, respectively. The CV analysis of the phenylacetylene in CH<sub>3</sub>CN (blue) displayed the oxidation wave at 2.8 V (vs Ag/AgCl) respectively. However, the mixture of diphenylphosphine and phenylacetylene in CH<sub>3</sub>CN (green) shows an oxidation peak at 2.0 and 3.0 V (vs Ag/AgCl). The attenuation of the diphenylphosphine oxidation peak suggests its preferential oxidation in the mixed system.

## 9. Spectroscopic Data of Products

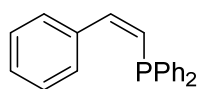

### (Z)-Diphenyl(styryl)phosphane (2a)

On 0.5 mmol scale. Electrolysis was conducted following the general procedure. The crude material was purified by flash column chromatography (silica gel, petroleum ether/ethyl acetate) to give **2a** (115.4 mg, 80% yield).

<sup>1</sup>H NMR (600 MHz, CDCl<sub>3</sub>): δ 7.46 – 7.36 (m, 6H), 7.34 – 7.26 (m, 10H), 6.46 (dd, *J* = 12.7, 2.8 Hz, 1H). <sup>31</sup>P{<sup>1</sup>H} NMR (243 MHz, CDCl<sub>3</sub>): δ –24.8.

Spectroscopic data matches that reported in the literature <sup>[1]</sup>.

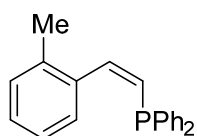

### (Z)-(2-Methylstyryl)diphenylphosphane (2b)

On 0.5 mmol scale. Electrolysis was conducted following the general procedure. The crude material was purified by flash column chromatography (silica gel, petroleum ether/ethyl acetate) to give **2b** (98.7 mg, 65% yield).

<sup>1</sup>H NMR (600 MHz, CDCl<sub>3</sub>): δ 7.47 – 7.43 (m, 1H), 7.42 – 7.40 (m, 4H), 7.32 – 7.29 (m, 7H), 7.18 – 7.10 (m, 3H), 6.54 (dd, *J* = 12.2, 2.9 Hz, 1H), 2.30 (s, 3H). <sup>31</sup>P{<sup>1</sup>H} NMR (243 MHz, CDCl<sub>3</sub>): δ –27.0.

Spectroscopic data matches that reported in the literature <sup>[2]</sup>.

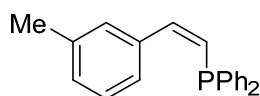

### **(Z)-(3-Methylstyryl)diphenylphosphane (2c)**

On 0.5 mmol scale. Electrolysis was conducted following the general procedure. The crude material was purified by flash column chromatography (silica gel, petroleum ether/ethyl acetate) to give **2c** (93.4 mg, 62% yield).

$^1\text{H}$  NMR (600 MHz,  $\text{CDCl}_3$ ):  $\delta$  7.43 – 7.36 (m, 4H), 7.34 – 7.28 (m, 9H), 7.22 – 7.06 (m, 1H), 6.43 (dd,  $J$  = 12.7, 2.6 Hz, 1H), 2.30 (s, 3H).  $^{31}\text{P}\{^1\text{H}\}$  NMR (243 MHz,  $\text{CDCl}_3$ ):  $\delta$  – 24.5.

Spectroscopic data matches that reported in the literature <sup>[1]</sup>.

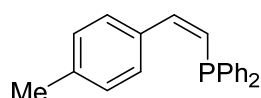

### **(Z)-(4-Methylstyryl)diphenylphosphane (2d)**

On 0.5 mmol scale. Electrolysis was conducted following the general procedure. The crude material was purified by flash column chromatography (silica gel, petroleum ether/ethyl acetate) to give **2d** (117.9 mg, 78% yield).

$^1\text{H}$  NMR (600 MHz,  $\text{CDCl}_3$ ):  $\delta$  7.51 – 7.47 (m, 6H), 7.39 – 7.36 (m, 7H), 7.18 – 7.17 (m, 2H), 6.44 (dd,  $J$  = 12.7, 2.9 Hz, 1H), 2.38 (s, 3H).  $^{31}\text{P}\{^1\text{H}\}$  NMR (243 MHz,  $\text{CDCl}_3$ ):  $\delta$  – 24.8.

Spectroscopic data matches that reported in the literature <sup>[1]</sup>.

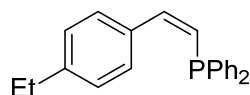

### **(Z)-(4-Ethylstyryl)diphenylphosphane (2e)**

On 0.5 mmol scale. Electrolysis was conducted following the general procedure. The crude material was purified by flash column chromatography (silica gel, petroleum ether/ethyl acetate) to give **2e** (93.9 mg, 59% yield).

$^1\text{H}$  NMR (600 MHz,  $\text{CDCl}_3$ ):  $\delta$  7.45 – 7.43 (m, 6H), 7.38 – 7.30 (m, 7H), 7.25 – 7.14 (m, 2H), 6.39 (dd,  $J$  = 12.7, 3.0 Hz, 1H), 2.62 (q,  $J$  = 7.6 Hz, 2H), 1.21 (t,  $J$  = 7.6 Hz, 3H).  $^{31}\text{P}\{^1\text{H}\}$  NMR (243 MHz,  $\text{CDCl}_3$ ):  $\delta$  – 24.8.

Spectroscopic data matches that reported in the literature <sup>[3]</sup>.

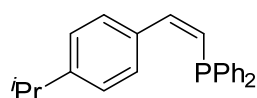

### **(Z)-(4-Isopropylstyryl)diphenylphosphane (2f)**

On 0.5 mmol scale. Electrolysis was conducted following the general procedure. The crude material was purified by flash column chromatography (silica gel, petroleum ether/ethyl acetate) to give **2f** (110.5 mg, 67% yield).

$^1\text{H}$  NMR (600 MHz,  $\text{CDCl}_3$ ):  $\delta$  7.45 – 7.43 (m, 6H), 7.34 – 7.31 (m, 7H), 7.25 – 7.17 (m, 2H), 6.39 (dd,  $J$  = 12.7, 2.9 Hz, 1H), 2.90 – 2.86 (m, 1H), 1.23 (d,  $J$  = 6.9 Hz, 6H).  $^{13}\text{C}\{^1\text{H}\}$  NMR (151 MHz,  $\text{CDCl}_3$ ):  $\delta$  149.0, 144.1 (d,  $J$  = 19.0 Hz), 139.5 (d,  $J$  = 9.3 Hz), 134.5, 132.7 (d,  $J$  = 18.7 Hz), 129.6 (d,  $J$  = 8.7 Hz), 128.5 (d,  $J$  = 6.6 Hz), 128.4, 128.2 (d,  $J$  = 15.6 Hz), 126.2, 33.9, 23.9.  $^{31}\text{P}\{^1\text{H}\}$  NMR (243 MHz,  $\text{CDCl}_3$ ):  $\delta$  –24.7. HRMS (ESI):  $[\text{M}+\text{H}]^+$  331.1616, found 331.1613.

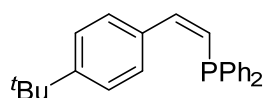

#### **(Z)-(4-(Tert-butylstyryl)diphenylphosphane (2g)**

On 0.5 mmol scale. Electrolysis was conducted following the general procedure. The crude material was purified by flash column chromatography (silica gel, petroleum ether/ethyl acetate) to give **2g** (103.4 mg, 60% yield).

$^1\text{H}$  NMR (600 MHz,  $\text{CDCl}_3$ ):  $\delta$  7.52 – 7.49 (m, 6H), 7.40 – 7.36 (m, 9H), 6.45 (dd,  $J$  = 12.7, 3.0 Hz, 1H), 1.35 (s, 9H).  $^{31}\text{P}\{^1\text{H}\}$  NMR (243 MHz,  $\text{CDCl}_3$ ):  $\delta$  –24.7.

Spectroscopic data matches that reported in the literature <sup>[4]</sup>.

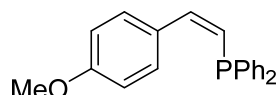

#### **(Z)-(4-Methoxystyryl)diphenylphosphane (2h)**

On 0.5 mmol scale. Electrolysis was conducted following the general procedure. The crude material was purified by flash column chromatography (silica gel, petroleum ether/ethyl acetate) to give **2h** (105.1 mg, 66% yield).

$^1\text{H}$  NMR (600 MHz,  $\text{CDCl}_3$ ):  $\delta$  7.52 – 7.48 (m, 6H), 7.38 – 7.34 (m, 7H), 6.89 (d,  $J$  = 8.7 Hz, 2H), 6.36 (dd,  $J$  = 12.6, 2.8 Hz, 1H), 3.82 (s, 3H).  $^{31}\text{P}\{^1\text{H}\}$  NMR (243 MHz,  $\text{CDCl}_3$ ):  $\delta$  –24.6.

Spectroscopic data matches that reported in the literature <sup>[1]</sup>.

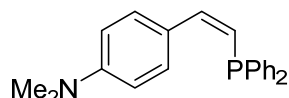

#### **(Z)-4-(2-(Diphenylphosphaneyl)vinyl)-N,N-dimethylaniline (2i)**

On 0.5 mmol scale. Electrolysis was conducted following the general procedure. The crude material was purified by flash column chromatography (silica gel, petroleum ether/ethyl acetate) to give **2i** (88.2 mg, 53% yield).

$^1\text{H}$  NMR (600 MHz,  $\text{CDCl}_3$ ):  $\delta$  7.53 – 7.51 (m, 6H), 7.37 – 7.36 (m, 7H), 6.71 – 6.69 (m, 2H), 6.23 – 6.20 (m, 1H), 2.99 (s, 6H).  $^{31}\text{P}\{^1\text{H}\}$  NMR (243 MHz,  $\text{CDCl}_3$ ):  $\delta$  – 23.9.

Spectroscopic data matches that reported in the literature <sup>[1]</sup>.

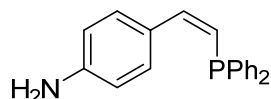

### **(Z)-4-(2-(Diphenylphosphaneyl)vinyl)aniline (2j)**

On 0.5 mmol scale. Electrolysis was conducted following the general procedure. The crude material was purified by flash column chromatography (silica gel, petroleum ether/ethyl acetate) to give **2j** (110.9 mg, 73% yield).

$^1\text{H}$  NMR (600 MHz,  $\text{CDCl}_3$ ):  $\delta$  7.49 – 7.46 (m, 4H), 7.42 – 7.39 (m, 2H), 7.36 – 7.33 (m, 7H), 6.64 – 6.63 (m, 2H), 6.23 (dd,  $J$  = 12.7, 2.8 Hz, 1H), 3.7 (br, 2H).  $^{31}\text{P}\{^1\text{H}\}$  NMR (243 MHz,  $\text{CDCl}_3$ ):  $\delta$  – 24.2.

Spectroscopic data matches that reported in the literature <sup>[2]</sup>.

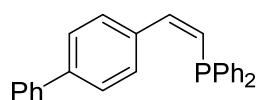

### **(Z)-2-([1,1'-Biphenyl]-4-yl)vinyl)diphenylphosphane (2k)**

On 0.5 mmol scale. Electrolysis was conducted following the general procedure. The crude material was purified by flash column chromatography (silica gel, petroleum ether/ethyl acetate) to give **2k** (159.6 mg, 88% yield).

$^1\text{H}$  NMR (600 MHz,  $\text{CDCl}_3$ ):  $\delta$  7.47 – 7.45 (m, 5H), 7.43 – 7.40 (m, 7H), 7.35 – 7.32 (m, 8H), 6.48 (dd,  $J$  = 12.7, 2.7 Hz, 1H).  $^{13}\text{C}\{^1\text{H}\}$  NMR (151 MHz,  $\text{CDCl}_3$ ):  $\delta$  143.6 (d,  $J$  = 18.9 Hz), 140.7 (d,  $J$  = 26.6 Hz), 139.3 (d,  $J$  = 9.0 Hz), 135.9, 133.1 (d,  $J$  = 18.7 Hz), 132.8 (d,  $J$  = 18.8 Hz), 130.0 (d,  $J$  = 8.6 Hz), 129.5 (d,  $J$  = 16.0 Hz), 128.8, 128.6 (d,  $J$  = 6.9 Hz), 127.4, 127.0, 126.8.  $^{31}\text{P}\{^1\text{H}\}$  NMR (243 MHz,  $\text{CDCl}_3$ ):  $\delta$  – 24.5. HRMS (ESI):  $[\text{M}+\text{H}]^+$  365.1459, found 365.1461.

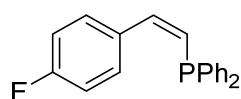

### **(Z)-(4-Fluorostyryl)diphenylphosphane (2l)**

On 0.5 mmol scale. Electrolysis was conducted following the general procedure. The crude material was purified by flash column chromatography (silica gel, petroleum ether/ethyl acetate) to give **2l** (124.5 mg, 81% yield).

$^1\text{H}$  NMR (600 MHz,  $\text{CDCl}_3$ ):  $\delta$  7.49 – 7.48 (m, 6H), 7.40 – 7.36 (m, 7H), 7.06 – 7.03 (m, 2H), 6.50 (dd,  $J$  = 12.7, 2.3 Hz, 1H).  $^{31}\text{P}$  NMR (243 MHz,  $\text{CDCl}_3$ ):  $\delta$  –25.0.  $^{19}\text{F}\{^1\text{H}\}$  NMR (565 MHz,  $\text{CDCl}_3$ ):  $\delta$  –113.1.

Spectroscopic data matches that reported in the literature <sup>[2]</sup>.

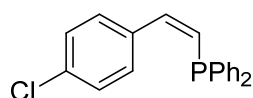

### **(Z)-(4-Chlorostyryl)diphenylphosphane (2m)**

On 0.5 mmol scale. Electrolysis was conducted following the general procedure. The crude material was purified by flash column chromatography (silica gel, petroleum ether/ethyl acetate) to give **2m** (101.9 mg, 63% yield).

$^1\text{H}$  NMR (600 MHz,  $\text{CDCl}_3$ ):  $\delta$  7.48 – 7.46 (m, 6H), 7.38 – 7.35 (m, 7H), 7.32 – 7.28 (m, 2H), 6.53 (dd,  $J$  = 12.7, 2.5 Hz, 1H).  $^{31}\text{P}\{^1\text{H}\}$  NMR (243 MHz,  $\text{CDCl}_3$ ):  $\delta$  – 24.9.

Spectroscopic data matches that reported in the literature <sup>[2]</sup>.

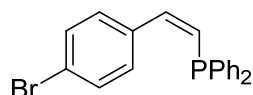

### **(Z)-(4-Bromostyryl)diphenylphosphane (2n)**

On 0.5 mmol scale. Electrolysis was conducted following the general procedure. The crude material was purified by flash column chromatography (silica gel, petroleum ether/ethyl acetate) to give **2n** (108.3 mg, 59% yield).

$^1\text{H}$  NMR (600 MHz,  $\text{CDCl}_3$ ):  $\delta$  7.47 – 7.45 (m, 6H), 7.40 – 7.28 (m, 9H), 6.54 (d,  $J$  = 12.7 Hz, 1H).  $^{31}\text{P}\{^1\text{H}\}$  NMR (243 MHz,  $\text{CDCl}_3$ ):  $\delta$  – 25.0.

Spectroscopic data matches that reported in the literature <sup>[2]</sup>.

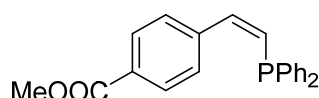

### **Methyl (Z)-4-(2-(diphenylphosphaneyl)vinyl)benzoate (2o)**

On 0.5 mmol scale. Electrolysis was conducted following the general procedure. The crude material was purified by flash column chromatography (silica gel, petroleum ether/ethyl acetate) to give **2o** (115.6 mg, 67% yield).

$^1\text{H}$  NMR (600 MHz,  $\text{CDCl}_3$ ):  $\delta$  8.05 – 8.03 (d,  $J$  = 8.3 Hz, 2H), 7.53 – 7.50 (m, 6H), 7.41 – 7.40 (m, 6H), 7.13 (dd,  $J$  = 17.0, 11 Hz, 1H), 6.90 (dd,  $J$  = 17.0, 12 Hz, 1H), 3.95 (s, 3H).  $^{13}\text{C}\{^1\text{H}\}$  NMR (151 MHz,  $\text{CDCl}_3$ ):  $\delta$  166.8, 141.6 (d,  $J$  = 26.8 Hz), 141.3 (d,  $J$  = 11.2 Hz), 137.4 (d,  $J$  = 9.2 Hz), 133.3 (d,  $J$  = 19.0 Hz), 130.4 (d,  $J$  = 13.9 Hz), 130.0, 129.0, 128.7 (d,  $J$  = 6.7 Hz), 126.7, 52.2.  $^{31}\text{P}\{^1\text{H}\}$  NMR (243 MHz,  $\text{CDCl}_3$ ):  $\delta$  – 10.8. HRMS (ESI):  $[\text{M}+\text{H}]^+$  347.1196, found 347.1194.

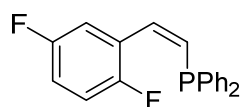

### **(Z)-(2,5-Difluorostyryl)diphenylphosphane (2p)**

On 0.5 mmol scale. Electrolysis was conducted following the general procedure. The crude material was purified by flash column chromatography (silica gel, petroleum ether/ethyl acetate) to give **2p** (114.2 mg, 70% yield).

$^1\text{H}$  NMR (600 MHz,  $\text{CDCl}_3$ ):  $\delta$  7.61 – 7.57 (m, 1H), 7.48 – 7.45 (m, 5H), 7.40 – 7.36 (m, 6H), 6.84 – 6.81 (m, 2H), 6.62 (dd,  $J$  = 12.7, 2.0 Hz, 1H).  $^{13}\text{C}\{^1\text{H}\}$  NMR (151 MHz,  $\text{CDCl}_3$ ):  $\delta$  162.7 (dd,  $J$  = 250.8, 12.2 Hz), 161.9 (dd,  $J$  = 251.7, 11.9 Hz), 138.6 (d,  $J$  = 8.9 Hz), 135.1 (d,  $J$  = 19.4, 4.2 Hz), 132.8, 132.7, 131.8, 131.7, 128.6 (t,  $J$  = 6.9 Hz), 121.2 (dt,  $J$  = 13.1, 2.6 Hz), 110.8 (dd,  $J$  = 21.4, 3.4 Hz), 103.7 (t,  $J$  = 25.5 Hz).  $^{31}\text{P}\{^1\text{H}\}$  NMR (243 MHz,  $\text{CDCl}_3$ ):  $\delta$  – 25.2 (d,  $J$  = 5.8 Hz).  $^{19}\text{F}\{^1\text{H}\}$  NMR (565 MHz,  $\text{CDCl}_3$ ):  $\delta$  – 109.3 (d,  $J$  = 8.1 Hz), – 111.2 (d,  $J$  = 7.7 Hz). HRMS (ESI):  $[\text{M}+\text{H}]^+$  325.0958, found 325.0961.

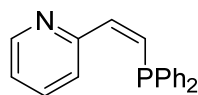

### **(Z)-2-(2-(Diphenylphosphaneyl)vinyl)pyridine (2q)**

On 0.5 mmol scale. Electrolysis was conducted following the general procedure. The crude material was purified by flash column chromatography (silica gel, petroleum ether/ethyl acetate) to give **2q** (113.4 mg, 78% yield).

$^1\text{H}$  NMR (600 MHz,  $\text{CDCl}_3$ ):  $\delta$  8.60 – 8.59 (d,  $J$  = 4.6 Hz), 7.67 – 7.64 (m, 1H), 7.53 – 7.37 (m, 10H), 7.31 – 7.28 (m, 2H), 7.19 – 7.16 (m, 1H), 6.84 (dd,  $J$  = 16.9, 11.2 Hz, 1H).  $^{31}\text{P}\{^1\text{H}\}$  NMR (243

MHz, CDCl<sub>3</sub>):  $\delta$  – 11.2.

Spectroscopic data matches that reported in the literature [5].

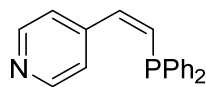

#### **(Z)-4-(2-(Diphenylphosphaneyl)vinyl)pyridine (2r)**

On 0.5 mmol scale. Electrolysis was conducted following the general procedure. The crude material was purified by flash column chromatography (silica gel, petroleum ether/ethyl acetate) to give **2r** (119.8 mg, 83% yield).

<sup>1</sup>H NMR (600 MHz, CDCl<sub>3</sub>):  $\delta$  8.54 (d,  $J$  = 6.0 Hz, 2H), 7.46 – 7.40 (m, 4H), 7.37 – 7.36 (m, 6H), 7.24 – 7.23 (m, 3H), 7.27 – 7.26 (m, 3H), 6.65 (dd,  $J$  = 17.1, 10.9 Hz, 1H). <sup>31</sup>P{<sup>1</sup>H} NMR (243 MHz, CDCl<sub>3</sub>):  $\delta$  – 10.7.

Spectroscopic data matches that reported in the literature [5].

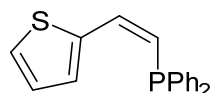

#### **(Z)-Diphenyl(2-(thiophen-2-yl)vinyl)phosphane (2s)**

On 0.5 mmol scale. Electrolysis was conducted following the general procedure. The crude material was purified by flash column chromatography (silica gel, petroleum ether/ethyl acetate) to give **2s** (101.8 mg, 69% yield).

<sup>1</sup>H NMR (600 MHz, CDCl<sub>3</sub>):  $\delta$  7.54 – 7.51 (m, 5H), 7.40 – 7.35 (m, 7H), 7.22 – 7.21 (m, 1H), 7.05 – 7.03 (m, 1H), 6.40 – 6.37 (m, 1H). <sup>13</sup>C{<sup>1</sup>H} NMR (151 MHz, CDCl<sub>3</sub>):  $\delta$  140.6, 138.7 (d,  $J$  = 9.0 Hz), 136.5 (d,  $J$  = 22.4 Hz), 132.7 (d,  $J$  = 18.8 Hz), 130.5 (d,  $J$  = 3.9 Hz), 128.6, 128.5 (d,  $J$  = 2.1 Hz), 128.3 (d,  $J$  = 10.8 Hz), 126.8, 126.4 (d,  $J$  = 15.6 Hz). <sup>31</sup>P{<sup>1</sup>H} NMR (243 MHz, CDCl<sub>3</sub>):  $\delta$  – 26.4. HRMS (ESI): [M+H]<sup>+</sup> 295.0705, found 295.0722.

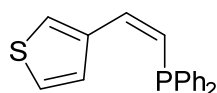

#### **(Z)-diphenyl(2-(thiophen-3-yl)vinyl)phosphane (2t)**

On 0.5 mmol scale. Electrolysis was conducted following the general procedure. The crude material was purified by flash column chromatography (silica gel, petroleum ether/ethyl acetate) to give **2t** (87.0 mg, 59% yield).



$^1\text{H}$  NMR (600 MHz,  $\text{CDCl}_3$ ):  $\delta$  7.51 – 7.46 (m, 6H), 7.40 – 7.37 (m, 7H), 7.30 – 7.25 (m, 1H), 6.40 (d,  $J=12.6$  Hz, 1H).  $^{31}\text{P}\{^1\text{H}\}$  NMR (243 MHz,  $\text{CDCl}_3$ ):  $\delta$  – 23.9.

Spectroscopic data matches that reported in the literature <sup>[4]</sup>.

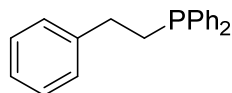

### Phenethyldiphenylphosphane(4a)

On 0.5 mmol scale. Electrolysis was conducted following the general procedure. The crude material was purified by flash column chromatography (silica gel, petroleum ether/ethyl acetate) to give **4a** (104.3 mg, 72% yield).

$^1\text{H}$  NMR (600 MHz,  $\text{CDCl}_3$ ):  $\delta$  7.46 – 7.43 (m, 4H), 7.35 – 7.32 (m, 6H), 7.28 – 7.25 (m, 2H), 7.19 – 7.16 (m, 3H), 2.74 – 2.70 (m, 2H), 2.38 – 2.35 (m, 2H).  $^{31}\text{P}\{^1\text{H}\}$  NMR (243 MHz,  $\text{CDCl}_3$ ):  $\delta$  – 15.9.

Spectroscopic data matches that reported in the literature <sup>[6]</sup>.

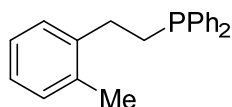

### (2-methylphenethyl)diphenylphosphine(4b)

On 0.5 mmol scale. Electrolysis was conducted following the general procedure. The crude material was purified by flash column chromatography (silica gel, petroleum ether/ethyl acetate) to give **4b** (104.3 mg, 75% yield).

$^1\text{H}$  NMR (600 MHz,  $\text{CDCl}_3$ ):  $\delta$  7.58 – 7.55 (m, 4H), 7.43 – 7.41 (m, 6H), 7.22 – 7.18 (m, 4H), 2.81 – 2.77 (m, 2H), 2.41 – 2.38 (m, 2H), 2.27 (s, 3H).  $^{31}\text{P}\{^1\text{H}\}$  NMR (243 MHz,  $\text{CDCl}_3$ ):  $\delta$  – 15.4.

Spectroscopic data matches that reported in the literature <sup>[6]</sup>.

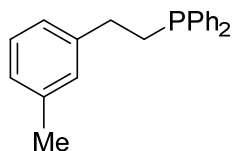

### (3-methylphenethyl)diphenylphosphane (4c)

On 0.5 mmol scale. Electrolysis was conducted following the general procedure. The crude material was purified by flash column chromatography (silica gel, petroleum ether/ethyl acetate) to give **4c** (104.3 mg, 63% yield).

$^1\text{H}$  NMR (600 MHz,  $\text{CDCl}_3$ ):  $\delta$  7.45 – 7.35 (m, 4H), 7.35 – 7.33 (m, 6H), 7.17 – 7.14 (m, 1H), 7.00

– 6.69 (m, 3H), 2.70 – 2.66 (m, 2H), 2.37 – 2.34 (m, 2H), 2.31 (s, 3H).  $^{31}\text{P}\{^1\text{H}\}$  NMR (243 MHz,  $\text{CDCl}_3$ ):  $\delta$  – 15.7.

Spectroscopic data matches that reported in the literature <sup>[6]</sup>.

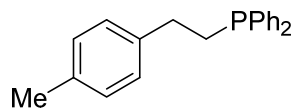

#### **4-methylphenethyl)diphenylphosphane(4d)**

On 0.5 mmol scale. Electrolysis was conducted following the general procedure. The crude material was purified by flash column chromatography (silica gel, petroleum ether/ethyl acetate) to give **4d** (85.5 mg, 56% yield).

$^1\text{H}$  NMR (600 MHz,  $\text{CDCl}_3$ ):  $\delta$  7.45 – 7.43 (m, 4H), 7.35 – 7.32 (m, 6H), 7.10 – 7.05 (m, 4H), 2.70 – 2.66 (m, 2H), 2.36 – 2.33 (m, 2H), 2.31 (s, 3H).  $^{31}\text{P}\{^1\text{H}\}$  NMR (243 MHz,  $\text{CDCl}_3$ ):  $\delta$  – 16.0.

Spectroscopic data matches that reported in the literature <sup>[6]</sup>.

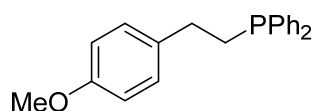

#### **(4-methoxyphenethyl)diphenylphosphane (4e)**

On 0.5 mmol scale. Electrolysis was conducted following the general procedure. The crude material was purified by flash column chromatography (silica gel, petroleum ether/ethyl acetate) to give **4e** (91.2 mg, 57% yield).

$^1\text{H}$  NMR (600 MHz,  $\text{CDCl}_3$ ):  $\delta$  7.45 – 7.43 (m, 4H), 7.35 – 7.32 (m, 6H), 7.10 – 7.09 (m, 2H), 6.82 – 6.81 (m, 2H), 3.78 (s, 3H), 2.78 – 2.65 (m, 2H), 2.35 – 2.32 (m, 2H).  $^{31}\text{P}\{^1\text{H}\}$  NMR (243 MHz,  $\text{CDCl}_3$ ):  $\delta$  – 16.2.

Spectroscopic data matches that reported in the literature <sup>[6]</sup>.

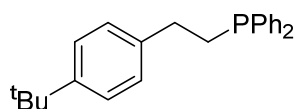

#### **(4-tert-butylphenethyl)diphenylphosphane (4f)**

On 0.5 mmol scale. Electrolysis was conducted following the general procedure. The crude material was purified by flash column chromatography (silica gel, petroleum ether/ethyl acetate) to give **4f** (125.2 mg, 72% yield).

$^1\text{H}$  NMR (600 MHz,  $\text{CDCl}_3$ ):  $\delta$  7.49 – 7.46 (m, 4H), 7.36 – 7.35 (m, 6H), 7.33 – 7.31 (m, 2H), 7.15

– 7.14 (m, 2H), 2.75 – 2.71 (m, 2H), 2.41 – 2.38 (m, 2H), 1.33 (s, 9H).  $^{31}\text{P}\{^1\text{H}\}$  NMR (243 MHz,  $\text{CDCl}_3$ ):  $\delta$  – 15.7.

Spectroscopic data matches that reported in the literature <sup>[6]</sup>.

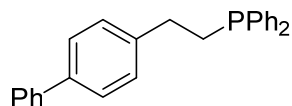

#### **{2-[(1,1'-Biphenyl)-4-yl]ethyl)diphenylphosphane (4g)}**

On 0.5 mmol scale. Electrolysis was conducted following the general procedure. The crude material was purified by flash column chromatography (silica gel, petroleum ether/ethyl acetate) to give **4g** (135.6 mg, 74% yield).

$^1\text{H}$  NMR (600 MHz,  $\text{CDCl}_3$ ):  $\delta$  7.67 – 7.66 (m, 2H), 7.60 – 7.50 (m, 8H), 7.44 – 7.42 (m, 7H), 7.34 – 7.33 (m, 2H), 2.89 – 2.87 (m, 2H), 2.52 – 2.49 (m, 2H).  $^{31}\text{P}\{^1\text{H}\}$  NMR (243 MHz,  $\text{CDCl}_3$ ):  $\delta$  – 15.8.

Spectroscopic data matches that reported in the literature <sup>[6]</sup>.

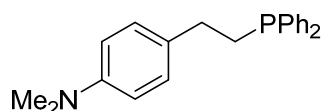

#### **(4-dimethylaminophenethyl)diphenylphosphane (4h)**

On 0.5 mmol scale. Electrolysis was conducted following the general procedure. The crude material was purified by flash column chromatography (silica gel, petroleum ether/ethyl acetate) to give **4h** (73.8 mg, 44% yield).

$^1\text{H}$  NMR (600 MHz,  $\text{CDCl}_3$ ):  $\delta$  7.53 – 7.51 (m, 4H), 7.41 – 7.39 (m, 6H), 7.13 – 7.11 (m, 2H), 6.76 – 6.74 (m, 2H), 2.97 (s, 6H), 2.73 – 2.70 (m, 2H), 2.42 – 2.39 (m, 2H).  $^{31}\text{P}\{^1\text{H}\}$  NMR (243 MHz,  $\text{CDCl}_3$ ):  $\delta$  – 16.0.

Spectroscopic data matches that reported in the literature <sup>[6]</sup>.

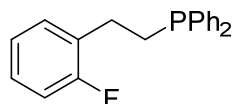

#### **(2-fluorophenethyl)diphenylphosphane (4i)**

On 0.5 mmol scale. Electrolysis was conducted following the general procedure. The crude material was purified by flash column chromatography (silica gel, petroleum ether/ethyl acetate) to give **4i** (103.4 mg, 67% yield).

$^1\text{H}$  NMR (600 MHz,  $\text{CDCl}_3$ ):  $\delta$  7.51 – 7.49 (m, 4H), 7.40 – 7.37 (m, 6H), 7.22 – 7.18 (m, 2H), 7.09 – 7.01 (m, 2H), 2.83 – 2.78 (m, 2H), 2.42 – 2.38 (m, 2H).  $^{31}\text{P}\{^1\text{H}\}$  NMR (243 MHz,  $\text{CDCl}_3$ ):  $\delta$  – 15.8.  $^{19}\text{F}\{^1\text{H}\}$  NMR (565 MHz,  $\text{CDCl}_3$ ):  $\delta$  – 118.5.

Spectroscopic data matches that reported in the literature <sup>[6]</sup>.

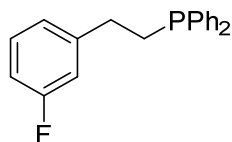

#### **(3-fluorophenethyl)diphenylphosphane (4j)**

On 0.5 mmol scale. Electrolysis was conducted following the general procedure. The crude material was purified by flash column chromatography (silica gel, petroleum ether/ethyl acetate) to give **4j** (87.6 mg, 57% yield).

$^1\text{H}$  NMR (600 MHz,  $\text{CDCl}_3$ ):  $\delta$  7.53 – 7.51 (m, 4H), 7.41 – 7.39 (m, 6H), 7.30 – 7.25 (m, 1H), 7.01 – 7.00 (m, 1H), 6.95 – 6.92 (m, 1H), 2.81 – 2.77 (m, 2H), 2.44 – 2.41 (m, 2H).  $^{31}\text{P}\{^1\text{H}\}$  NMR (243 MHz,  $\text{CDCl}_3$ ):  $\delta$  – 16.1.  $^{19}\text{F}\{^1\text{H}\}$  NMR (565 MHz,  $\text{CDCl}_3$ ):  $\delta$  – 113.4.

Spectroscopic data matches that reported in the literature <sup>[6]</sup>.

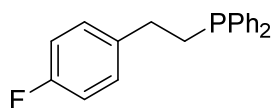

#### **(4-fluorophenethyl)diphenylphosphane (4k)**

On 0.5 mmol scale. Electrolysis was conducted following the general procedure. The crude material was purified by flash column chromatography (silica gel, petroleum ether/ethyl acetate) to give **4k** (93.9 mg, 61% yield).

$^1\text{H}$  NMR (600 MHz,  $\text{CDCl}_3$ ):  $\delta$  7.49 – 7.46 (m, 4H), 7.38 – 7.37 (m, 6H), 7.16 – 7.14 (m, 2H), 7.00 – 6.97 (m, 2H), 2.75 – 2.71 (m, 2H), 2.39 – 2.36 (m, 2H).  $^{31}\text{P}\{^1\text{H}\}$  NMR (243 MHz,  $\text{CDCl}_3$ ):  $\delta$  – 16.3.  $^{19}\text{F}\{^1\text{H}\}$  NMR (565 MHz,  $\text{CDCl}_3$ ):  $\delta$  – 117.4.

Spectroscopic data matches that reported in the literature <sup>[6]</sup>.

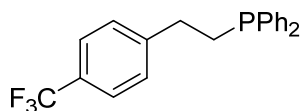

#### **(4-trifluoromethylphenethyl)diphenylphosphane (4l)**

On 0.5 mmol scale. Electrolysis was conducted following the general procedure. The crude material was purified by flash column chromatography (silica gel, petroleum ether/ethyl acetate) to give **4l**

(75.2 mg, 42% yield).

$^1\text{H}$  NMR (600 MHz,  $\text{CDCl}_3$ ):  $\delta$  7.54 – 7.53 (m, 2H), 7.48 – 7.45 (m, 4H), 7.38 – 7.37 (m, 6H), 7.30 – 7.28 (m, 2H), 2.82 – 2.78 (m, 2H), 2.40 – 2.38 (m, 2H).  $^{31}\text{P}\{^1\text{H}\}$  NMR (243 MHz,  $\text{CDCl}_3$ ):  $\delta$  – 16.0.  $^{19}\text{F}\{^1\text{H}\}$  NMR (565 MHz,  $\text{CDCl}_3$ ):  $\delta$  – 62.3.

Spectroscopic data matches that reported in the literature [6].

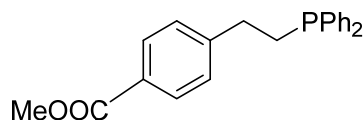

#### Methyl 4-(2-(diphenylphosphino)ethyl)benzoate (4m)

On 0.5 mmol scale. Electrolysis was conducted following the general procedure. The crude material was purified by flash column chromatography (silica gel, petroleum ether/ethyl acetate) to give **4m** (116.0 mg, 64% yield).

$^1\text{H}$  NMR (600 MHz,  $\text{CDCl}_3$ ):  $\delta$  7.97 – 7.96 (m, 2H), 7.49 – 7.46 (m, 4H), 7.39 – 7.36 (m, 5H), 7.26 – 7.25 (m, 2H), 3.93 (s, 3H), 2.81 – 2.77 (m, 2H), 2.41 – 2.38 (m, 2H).  $^{31}\text{P}\{^1\text{H}\}$  NMR (243 MHz,  $\text{CDCl}_3$ ):  $\delta$  – 15.9.

Spectroscopic data matches that reported in the literature [7].

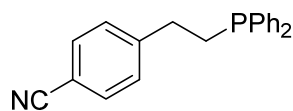

#### 4-(2-(diphenylphosphino)ethyl)benzonitrile (4n)

On 0.5 mmol scale. Electrolysis was conducted following the general procedure. The crude material was purified by flash column chromatography (silica gel, petroleum ether/ethyl acetate) to give **4n** (75.9 mg, 48% yield).

$^1\text{H}$  NMR (600 MHz,  $\text{CDCl}_3$ ):  $\delta$  7.58 – 7.57 (m, 2H), 7.48 – 7.46 (m, 4H), 7.39 – 7.38 (m, 6H), 7.29 – 7.28 (m, 2H), 2.83 – 2.79 (m, 2H), 2.41 – 2.38 (m, 2H).  $^{31}\text{P}\{^1\text{H}\}$  NMR (243 MHz,  $\text{CDCl}_3$ ):  $\delta$  – 16.2.

Spectroscopic data matches that reported in the literature [7].

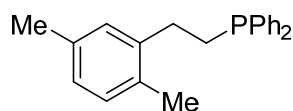

#### (2,5-dimethylphenethyl)diphenylphosphane (4o)

On 0.5 mmol scale. Electrolysis was conducted following the general procedure. The crude material

was purified by flash column chromatography (silica gel, petroleum ether/ethyl acetate) to give **4o** (71.4 mg, 45% yield).

$^1\text{H}$  NMR (600 MHz,  $\text{CDCl}_3$ ):  $\delta$  7.58 – 7.56 (m, 4H), 7.44 – 7.40 (m, 6H), 7.10 – 7.00 (m, 3H), 2.78 – 2.76 (m, 2H), 2.41 – 2.40 (m, 2H), 2.38 (s, 3H), 2.23 (s, 3H).  $^{31}\text{P}\{^1\text{H}\}$  NMR (243 MHz,  $\text{CDCl}_3$ ):  $\delta$  – 15.2.

Spectroscopic data matches that reported in the literature <sup>[7]</sup>.

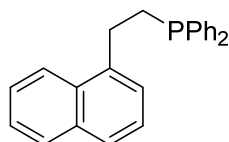

#### **[2-(naphthalen-1-yl)ethyl]diphenylphosphane (4p)**

On 0.5 mmol scale. Electrolysis was conducted following the general procedure. The crude material was purified by flash column chromatography (silica gel, petroleum ether/ethyl acetate) to give **4p** (83.7 mg, 49% yield).

$^1\text{H}$  NMR (600 MHz,  $\text{CDCl}_3$ ):  $\delta$  7.91 – 7.90 (m, 1H), 7.85 – 7.83 (m, 1H), 7.78 – 7.77 (m, 1H), 7.59 – 7.39 (m, 14H), 3.26 – 3.22 (m, 2H), 2.57 – 2.54 (m, 2H).  $^{31}\text{P}\{^1\text{H}\}$  NMR (243 MHz,  $\text{CDCl}_3$ ):  $\delta$  – 15.3.

Spectroscopic data matches that reported in the literature <sup>[7]</sup>.

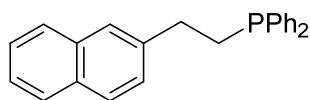

#### **[2-(naphthalen-2-yl)ethyl]diphenylphosphane (4q)**

On 0.5 mmol scale. Electrolysis was conducted following the general procedure. The crude material was purified by flash column chromatography (silica gel, petroleum ether/ethyl acetate) to give **4q** (97.1 mg, 57% yield).

$^1\text{H}$  NMR (600 MHz,  $\text{CDCl}_3$ ):  $\delta$  7.89 – 7.84 (m, 3H), 7.70 (s, 1H), 7.85 – 7.83 (m, 1H), 7.60 – 7.50 (m, 6H), 7.46 – 7.39 (m, 7H), 3.01 – 2.98 (m, 2H), 2.58 – 2.54 (m, 2H).  $^{31}\text{P}\{^1\text{H}\}$  NMR (243 MHz,  $\text{CDCl}_3$ ):  $\delta$  – 15.6.

Spectroscopic data matches that reported in the literature <sup>[7]</sup>.

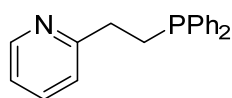

#### **2-(2-(diphenylphosphino)ethyl)pyridine (4r)**

On 0.5 mmol scale. Electrolysis was conducted following the general procedure. The crude material was purified by flash column chromatography (silica gel, petroleum ether/ethyl acetate) to give **4r** (109.5 mg, 75% yield).

$^1\text{H}$  NMR (600 MHz,  $\text{CDCl}_3$ ):  $\delta$  8.55 (d,  $J = 4.8$  Hz 1H), 7.57 – 7.55 (m, 1H), 7.51 – 7.49 (m, 4H), 7.37 – 7.32 (m, 6H), 7.13 – 7.09 (m, 2H), 2.96 – 2.92 (m, 2H), 2.56 – 2.54 (m, 2H).  $^{31}\text{P}\{^1\text{H}\}$  NMR (243 MHz,  $\text{CDCl}_3$ ):  $\delta$  – 15.4.

Spectroscopic data matches that reported in the literature [7].

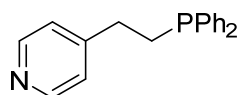

#### 4-(2-(diphenylphosphino)ethyl)pyridine (**4s**)

On 0.5 mmol scale. Electrolysis was conducted following the general procedure. The crude material was purified by flash column chromatography (silica gel, petroleum ether/ethyl acetate) to give **4s** (97.7 mg, 67% yield).

$^1\text{H}$  NMR (600 MHz,  $\text{CDCl}_3$ ):  $\delta$  8.50 – 8.49 (m, 2H), 7.48 – 7.45 (m, 4H), 7.38 – 7.37 (m, 6H), 7.12 – 7.11 (m, 2H), 2.75 – 2.71 (m, 2H), 2.40 – 2.36 (m, 2H).  $^{31}\text{P}\{^1\text{H}\}$  NMR (243 MHz,  $\text{CDCl}_3$ ):  $\delta$  – 16.0.

Spectroscopic data matches that reported in the literature [7].

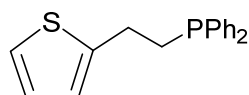

#### Diphenyl(2-(thiophen-2-yl)ethyl)phosphane (**4t**)

On 0.5 mmol scale. Electrolysis was conducted following the general procedure. The crude material was purified by flash column chromatography (silica gel, petroleum ether/ethyl acetate) to give **4t** (59.3 mg, 40% yield).

$^1\text{H}$  NMR (600 MHz,  $\text{CDCl}_3$ ):  $\delta$  7.49 – 7.46 (m, 4H), 7.39 – 7.36 (m, 6H), 7.14 (d, 1H), 6.94 – 6.93 (m, 1H), 6.82 (d, 1H), 2.99 – 2.95 (m, 2H), 2.48 – 2.45 (m, 2H).  $^{31}\text{P}\{^1\text{H}\}$  NMR (243 MHz,  $\text{CDCl}_3$ ):  $\delta$  – 16.4.

Spectroscopic data matches that reported in the literature [8].

## 10. Spectra of prepared compounds

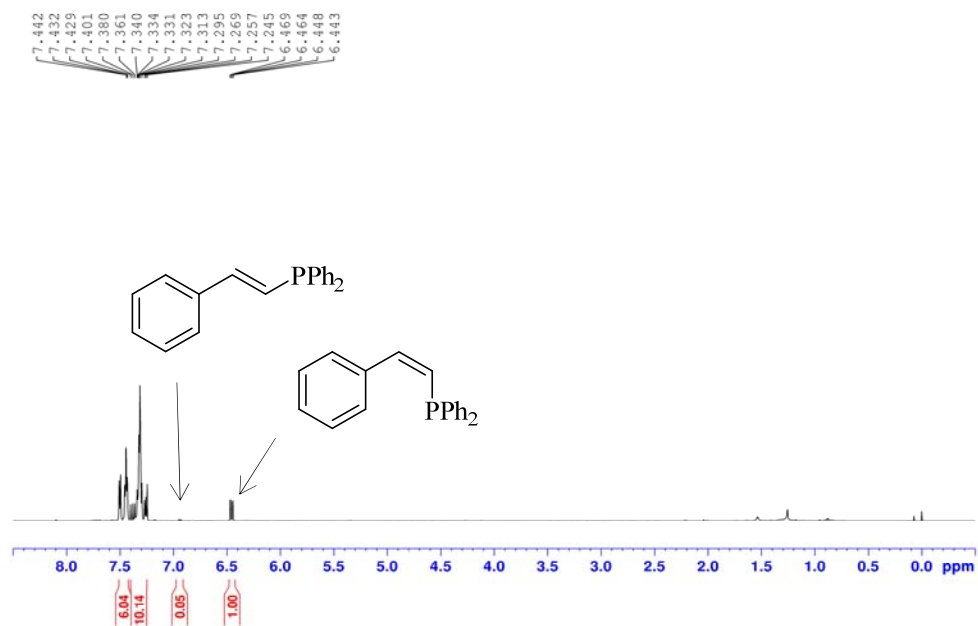

**Figure S2.** <sup>1</sup>H NMR spectrum of compound **2a**

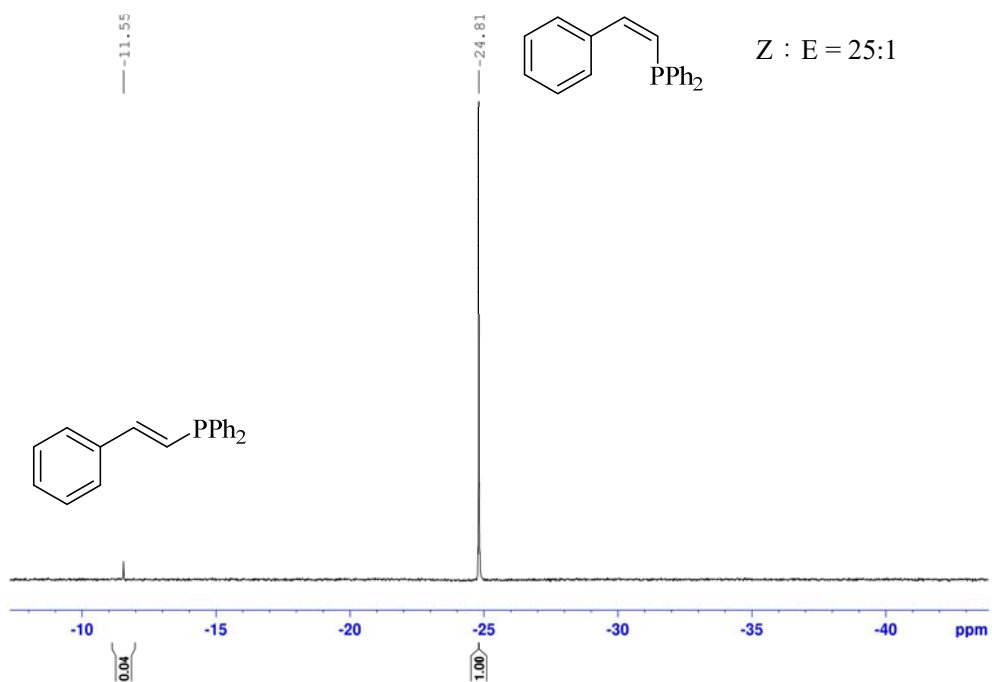

**Figure S3.** <sup>31</sup>P NMR spectrum of compound **2a**



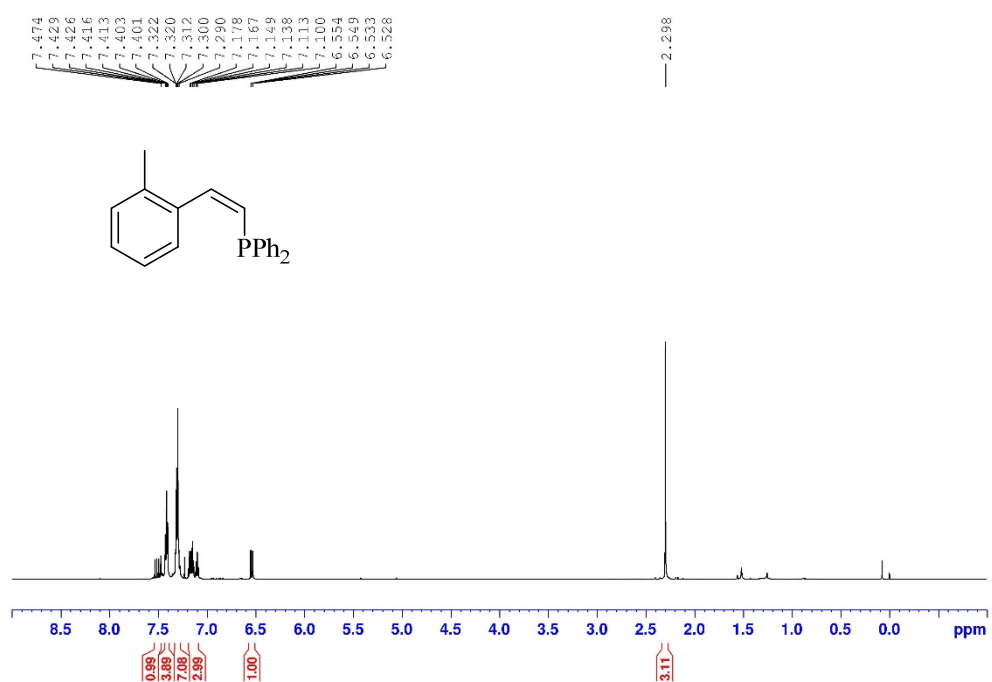

**Figure S4.** <sup>1</sup>H NMR spectrum of compound **2b**

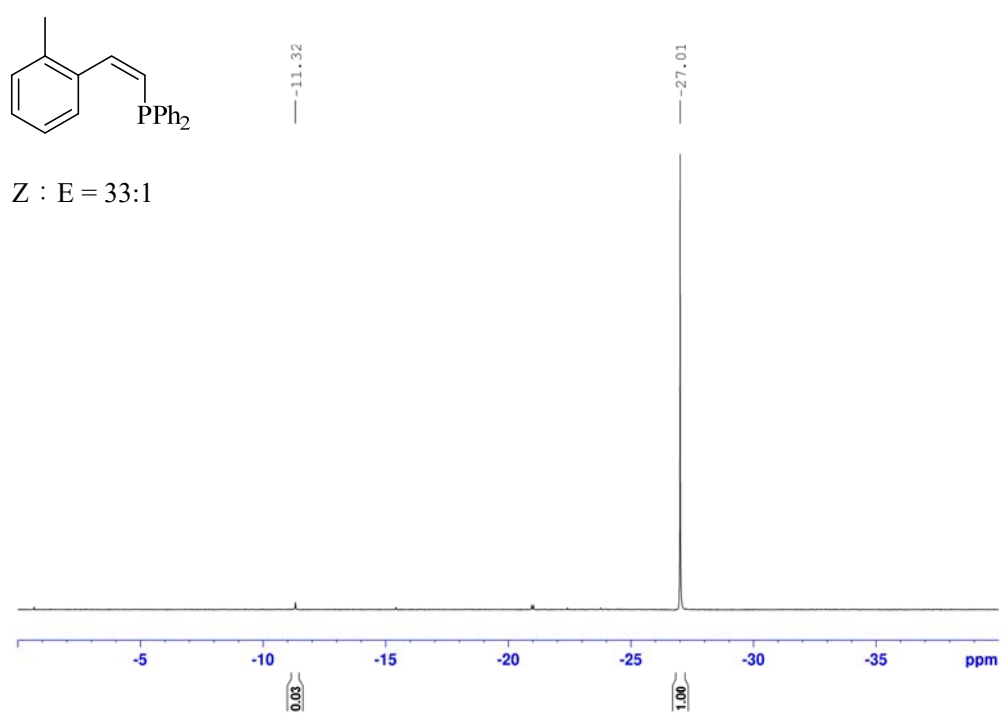

**Figure S5.** <sup>31</sup>P NMR spectrum of compound **2b**

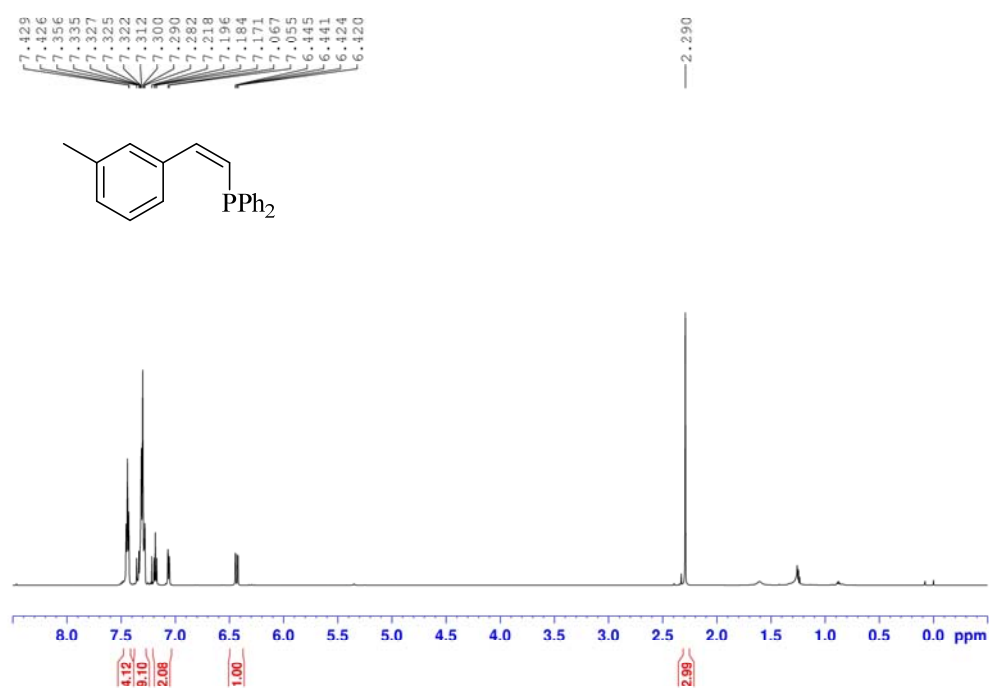

**Figure S6.**  $^1\text{H}$  NMR spectrum of compound 2c

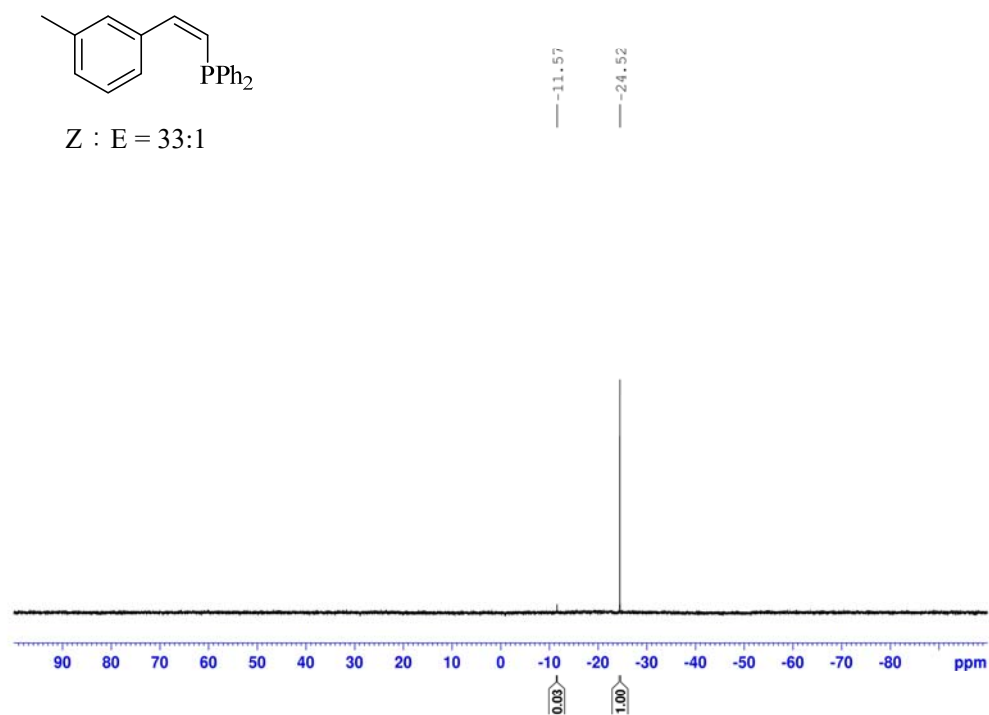

**Figure S7.**  $^{31}\text{P}$  NMR spectrum of compound 2c

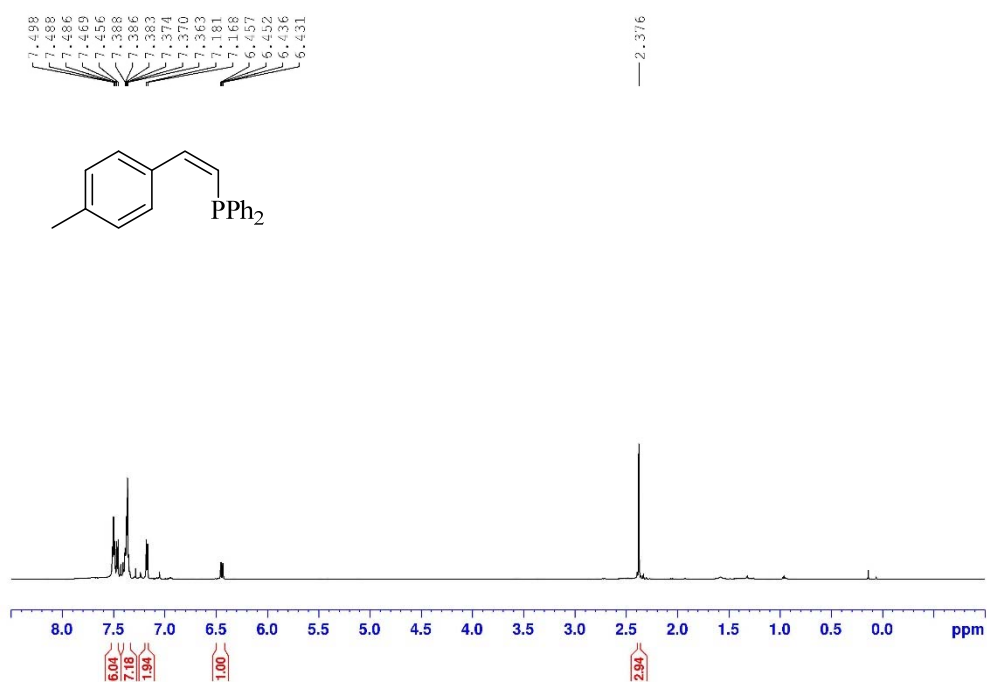

**Figure S8.** <sup>1</sup>H NMR spectrum of compound **2d**

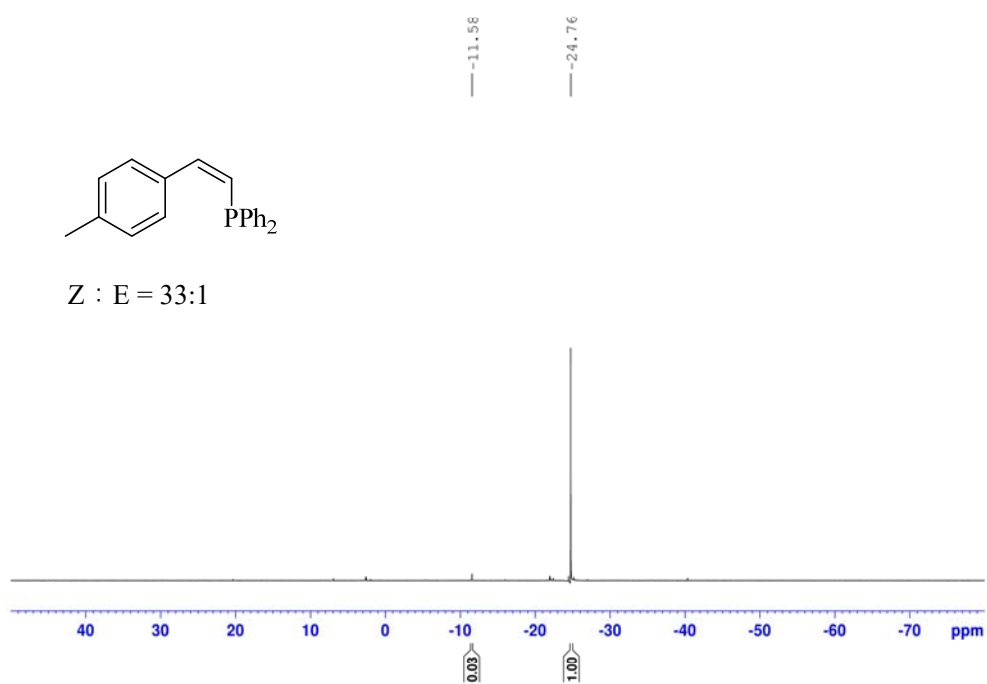

**Figure S9.** <sup>31</sup>P NMR spectrum of compound **2d**

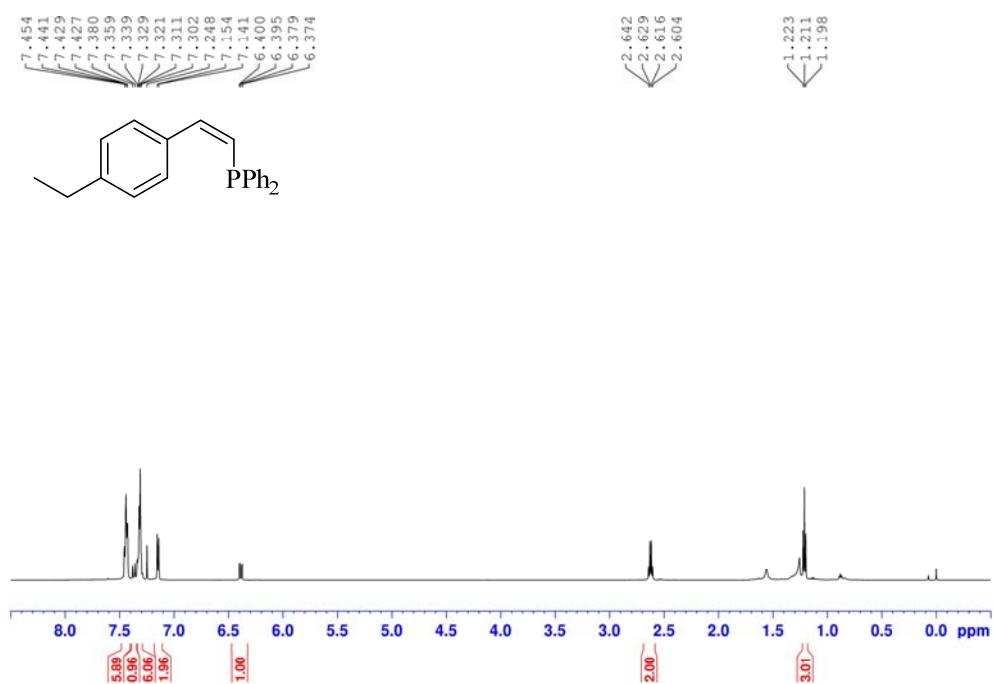

**Figure S10.** <sup>1</sup>H NMR spectrum of compound **2e**

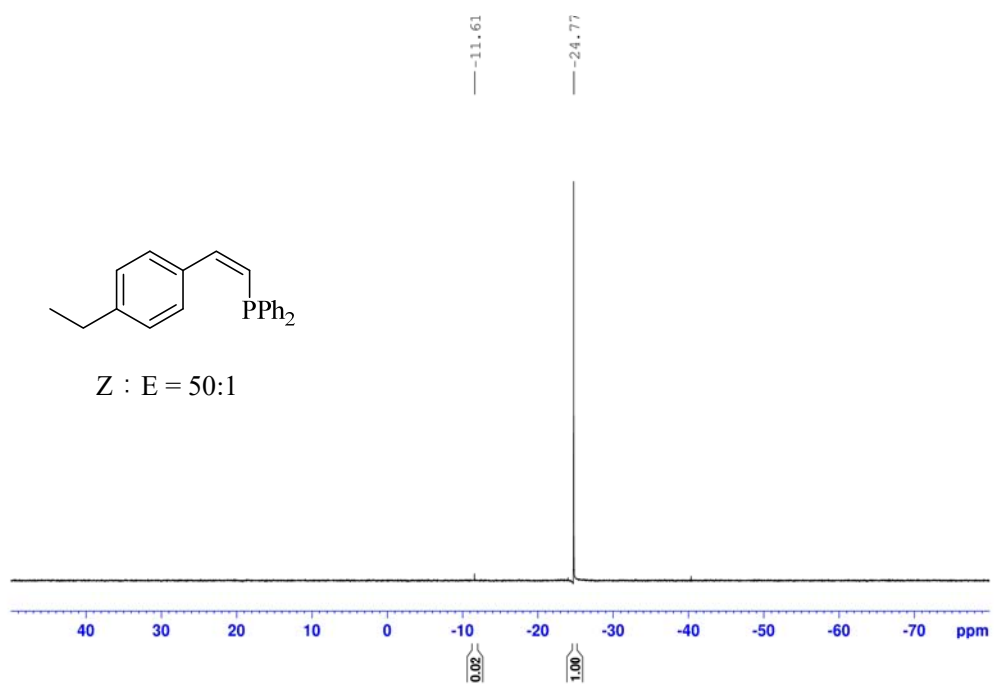

**Figure S11.** <sup>31</sup>P NMR spectrum of compound **2e**

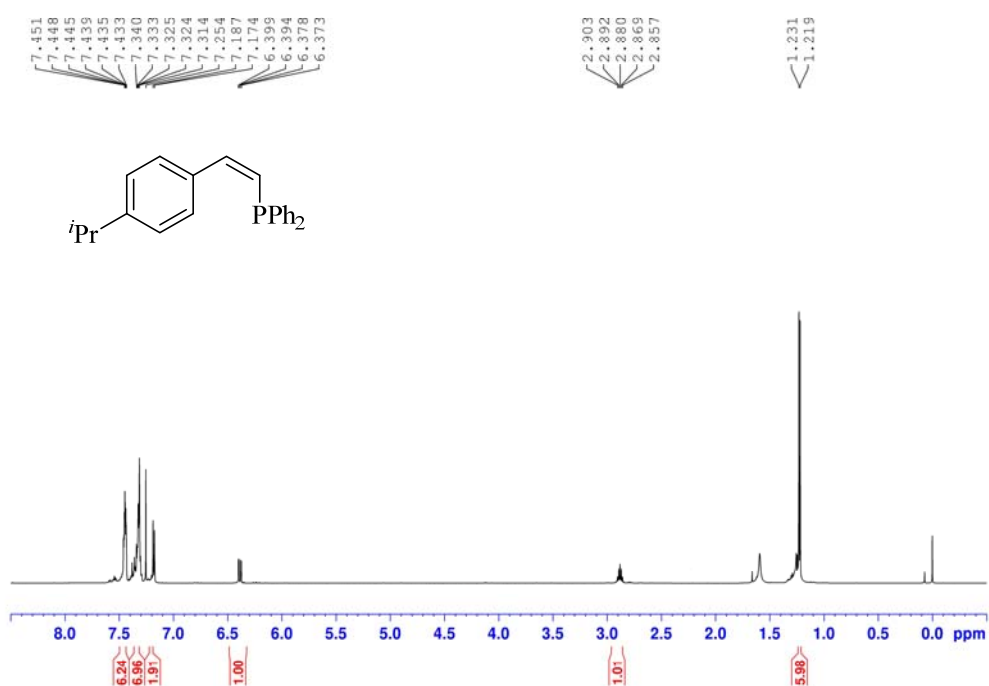

**Figure S12.**  $^1\text{H}$  NMR spectrum of compound **2f**

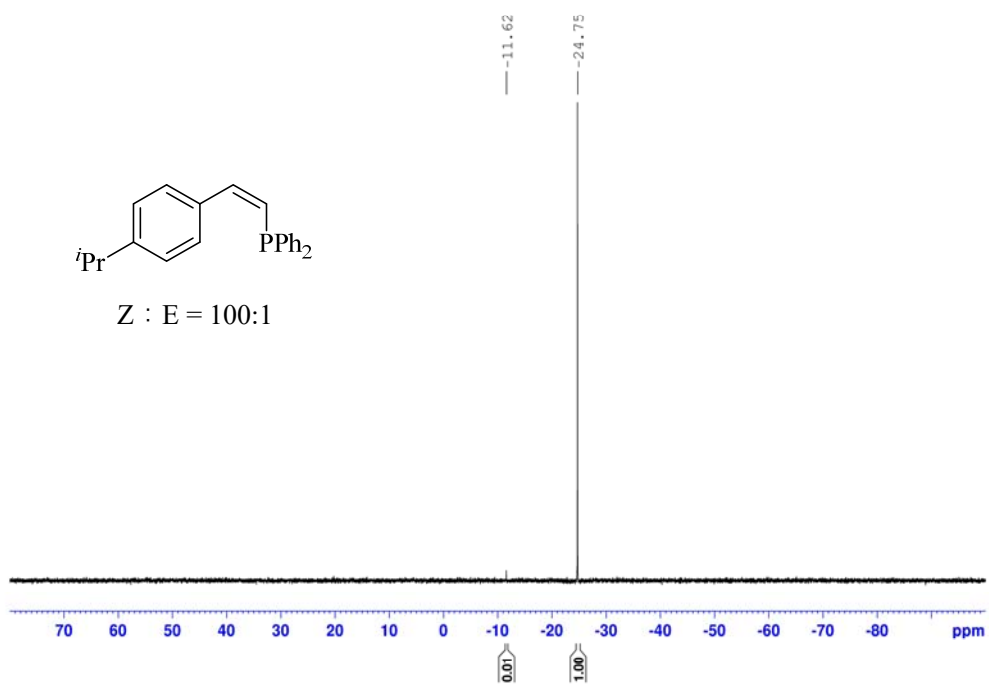

**Figure S13.**  $^{31}\text{P}$  NMR spectrum of compound **2f**

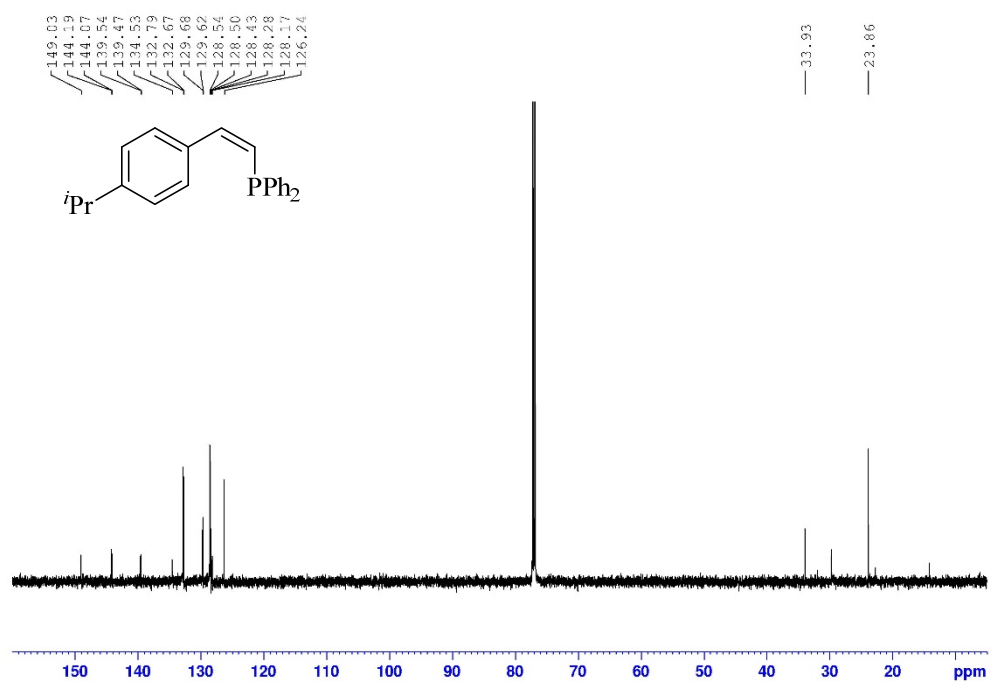

Figure S14. <sup>13</sup>C NMR spectrum of compound **2f**

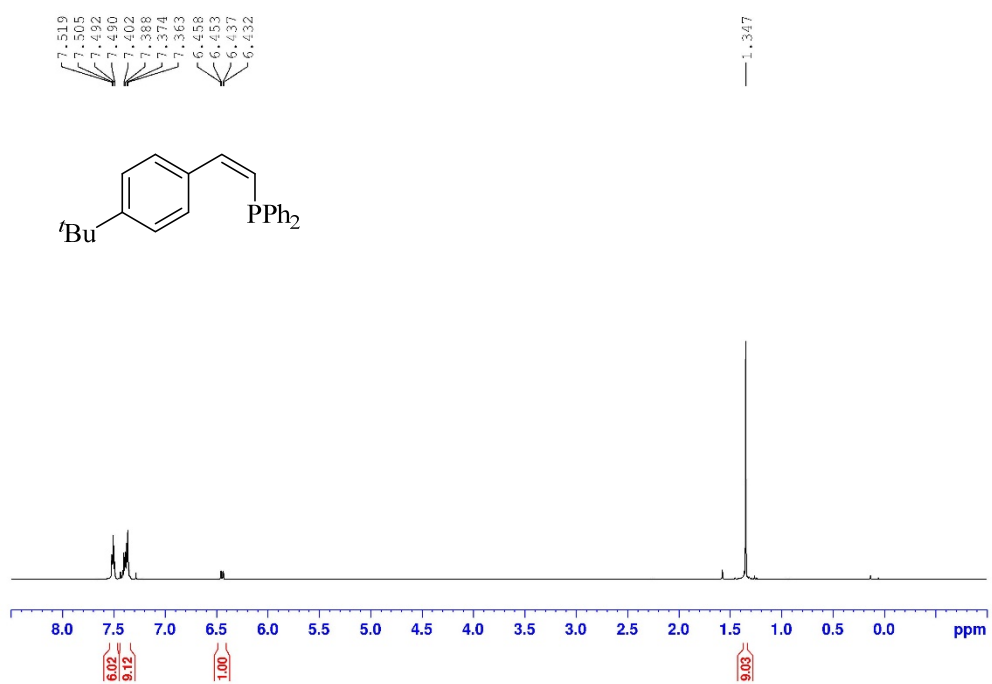

Figure S15. <sup>1</sup>H NMR spectrum of compound **2g**

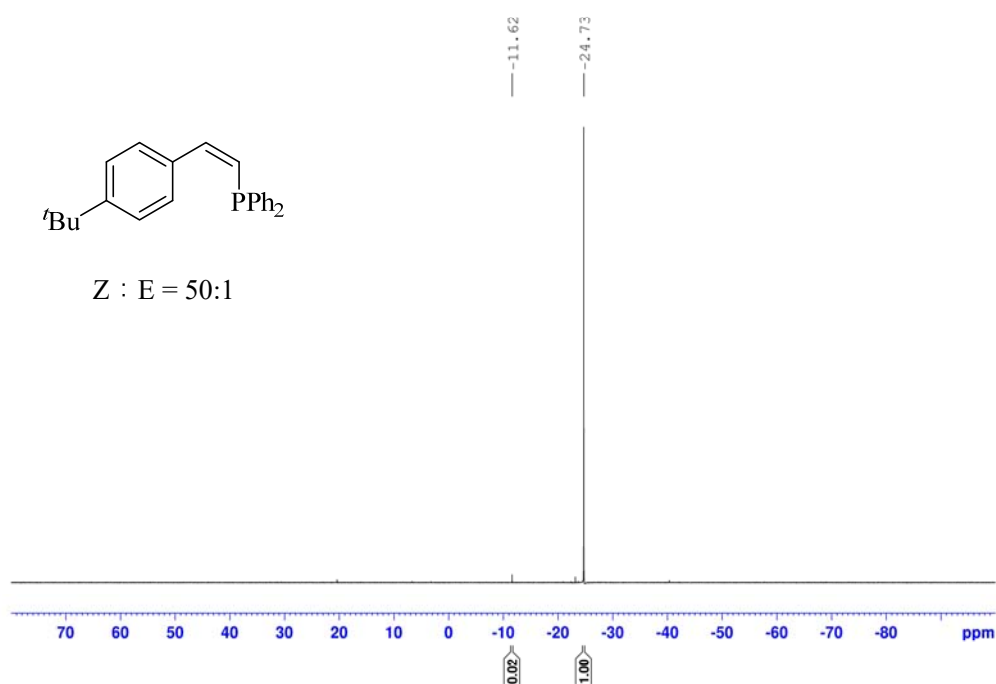

Figure S16.  $^{31}\text{P}$  NMR spectrum of compound **2g**

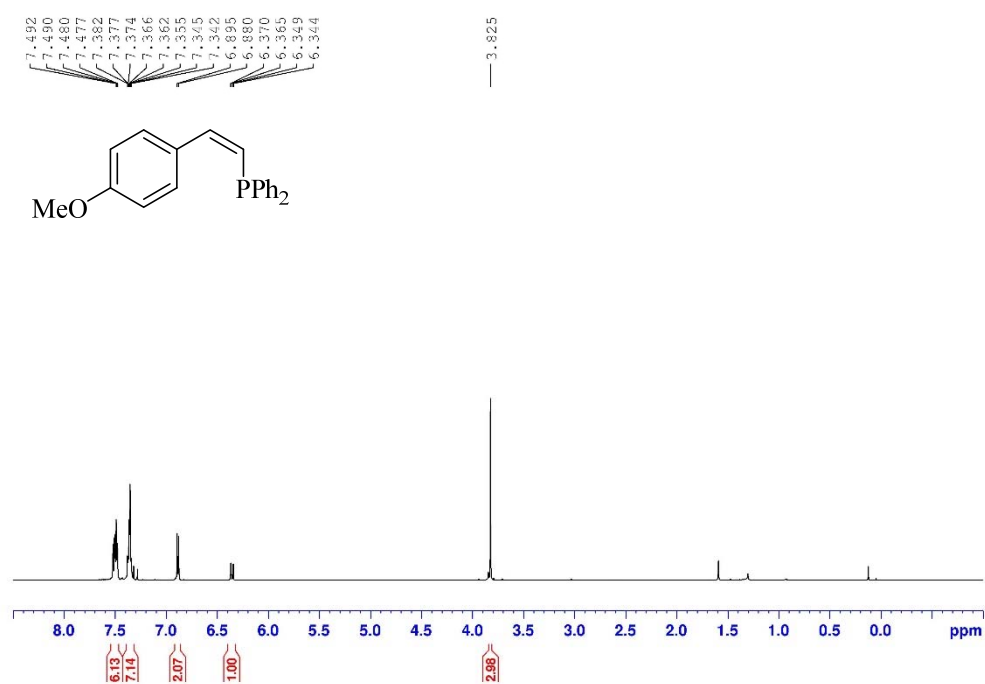

Figure S17.  $^1\text{H}$  NMR spectrum of compound **2h**

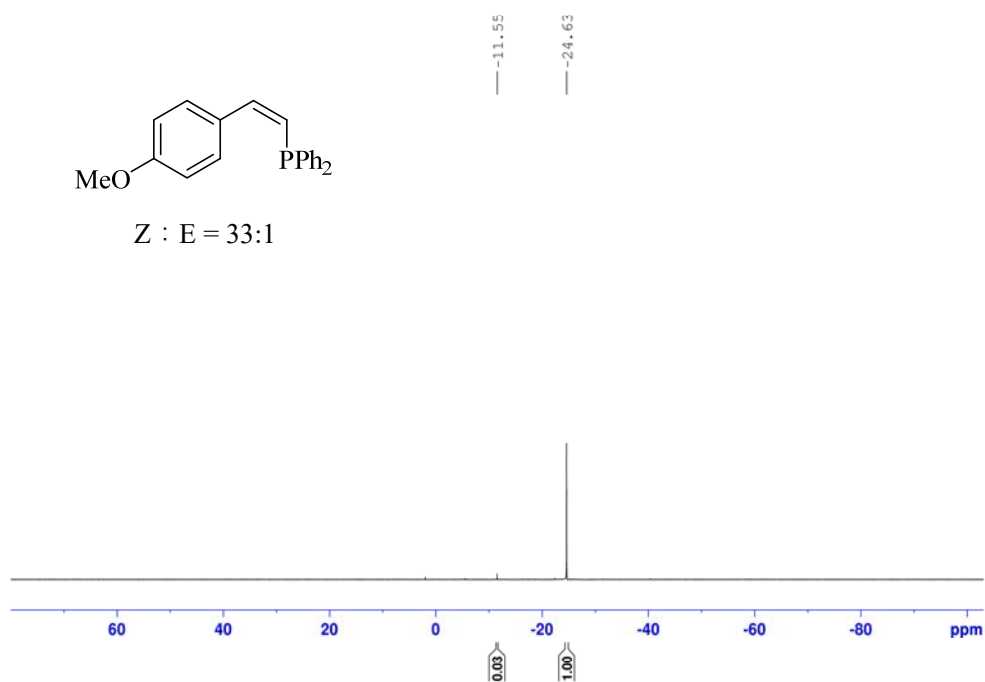

**Figure S18.**  $^{31}\text{P}$  NMR spectrum of compound **2h**

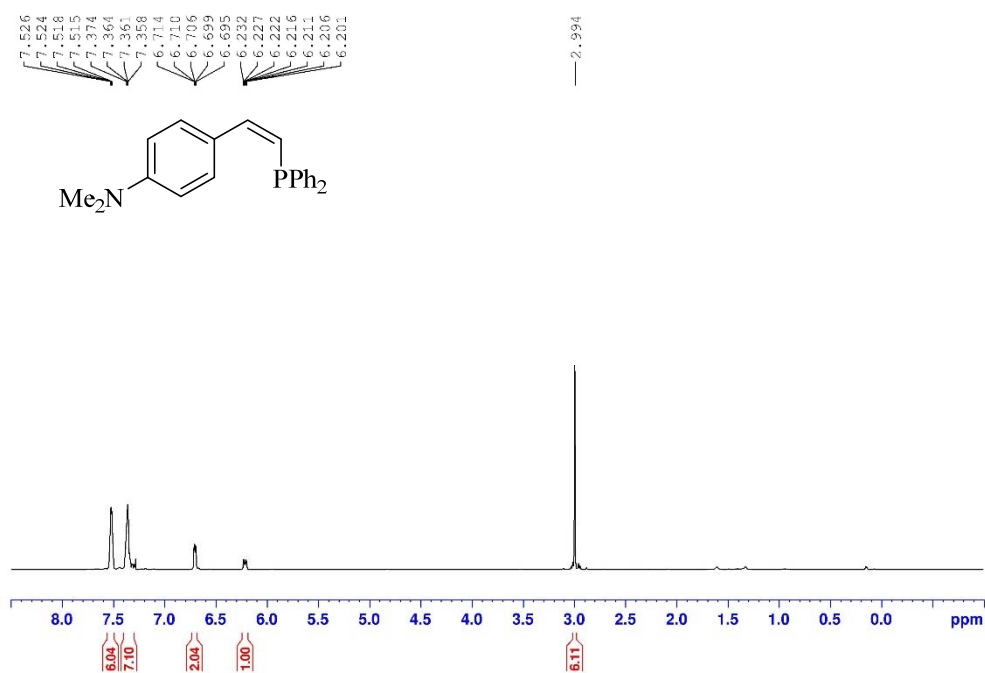

**Figure S19.**  $^1\text{H}$  NMR spectrum of compound **2i**



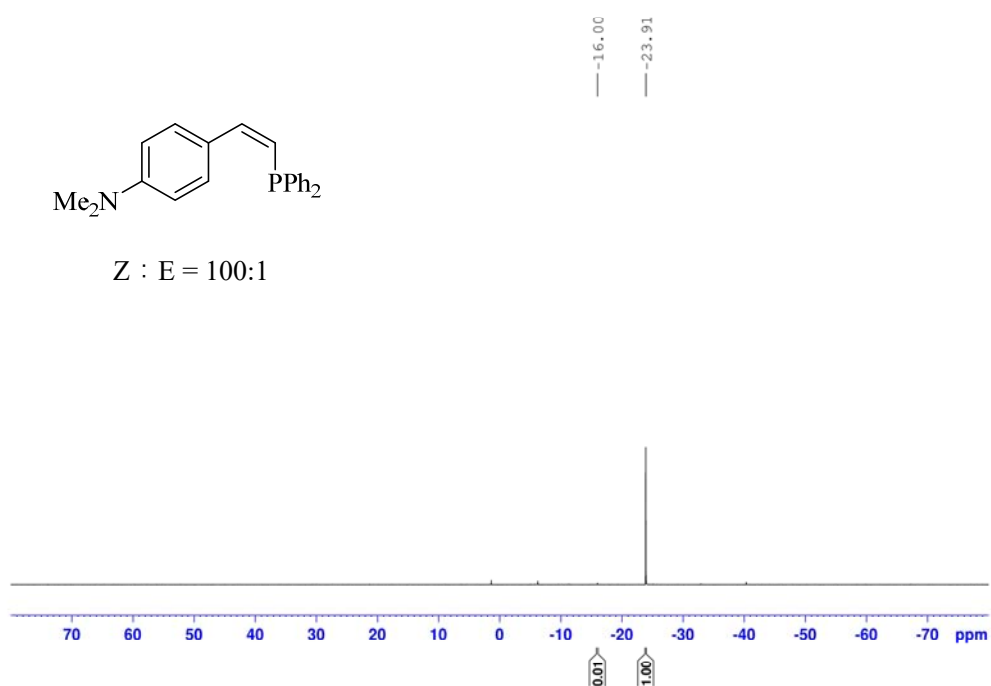

**Figure S20.**  $^{31}\text{P}$  NMR spectrum of compound **2i**

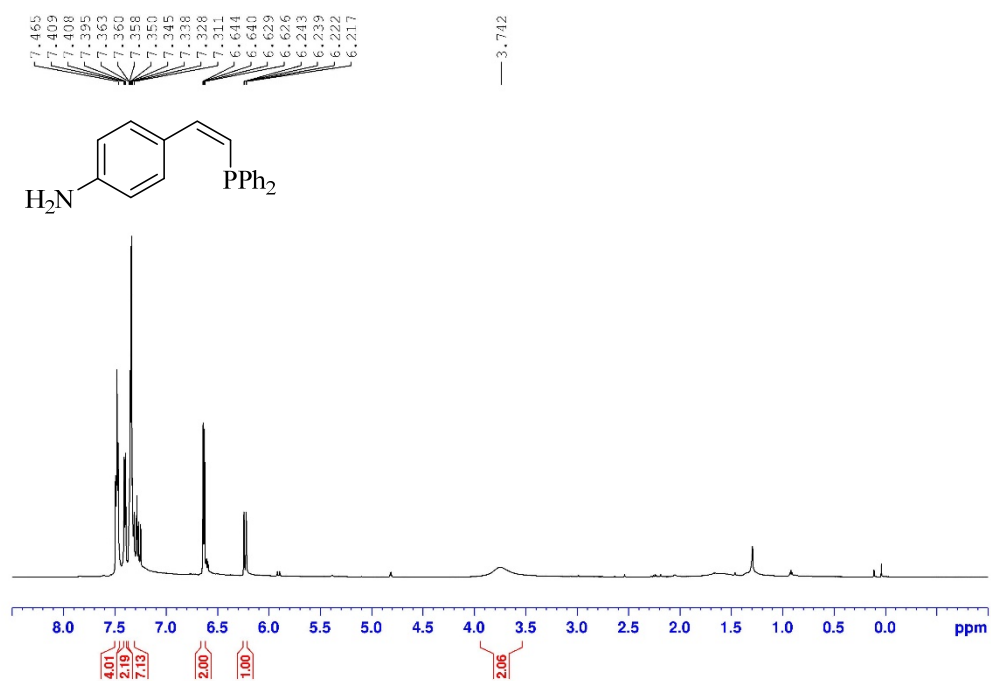

**Figure S21.**  $^1\text{H}$  NMR spectrum of compound **2j**

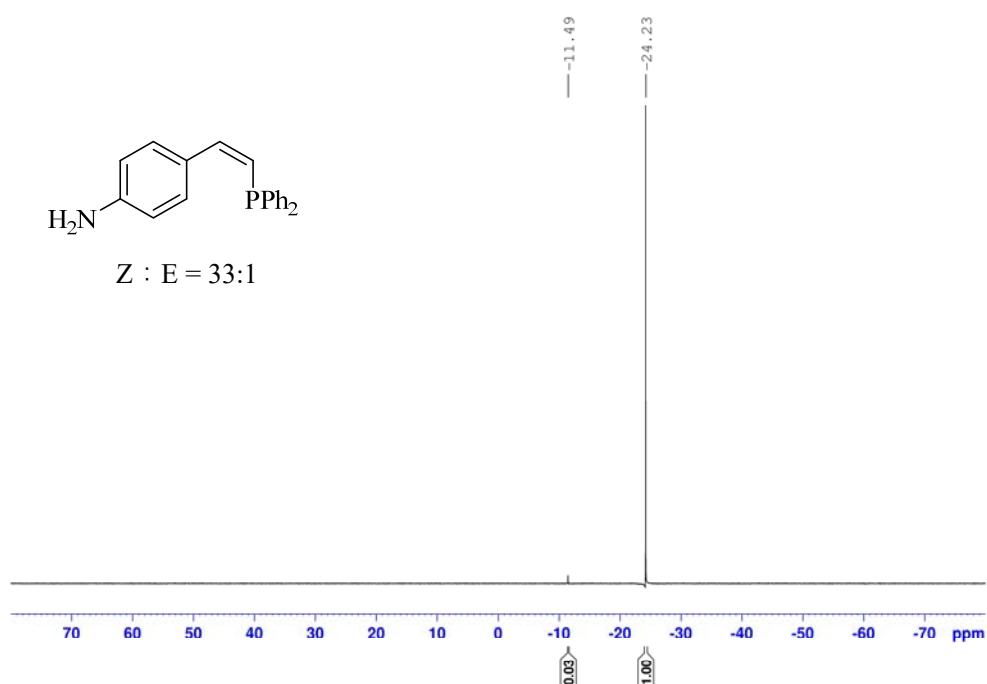

**Figure S22.**  $^{31}\text{P}$  NMR spectrum of compound **2j**

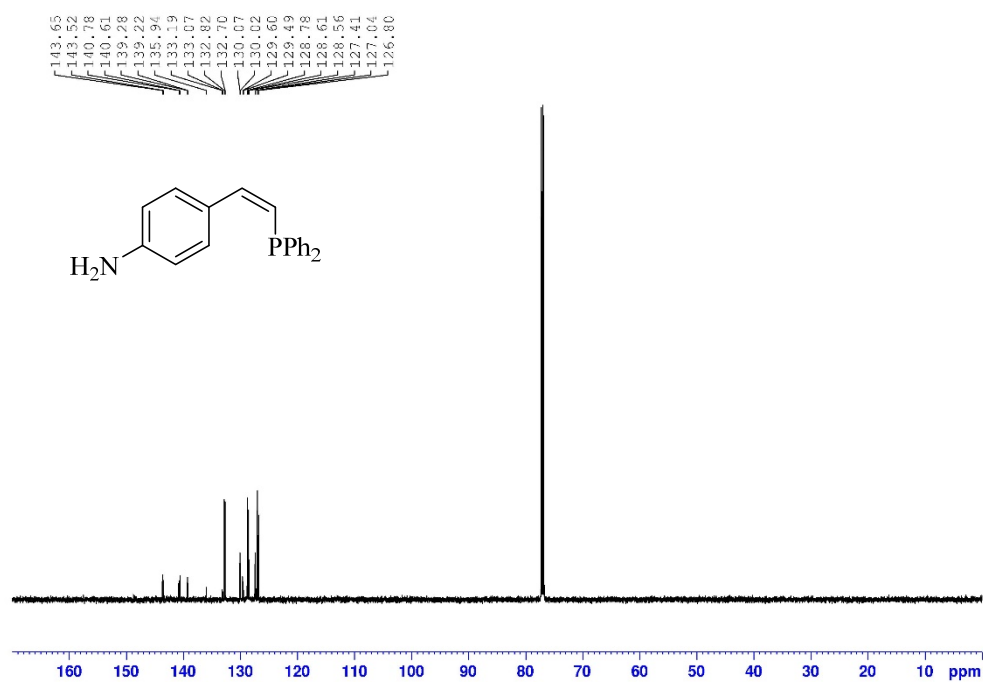

**Figure S23.**  $^{13}\text{C}$  NMR spectrum of compound **2j**

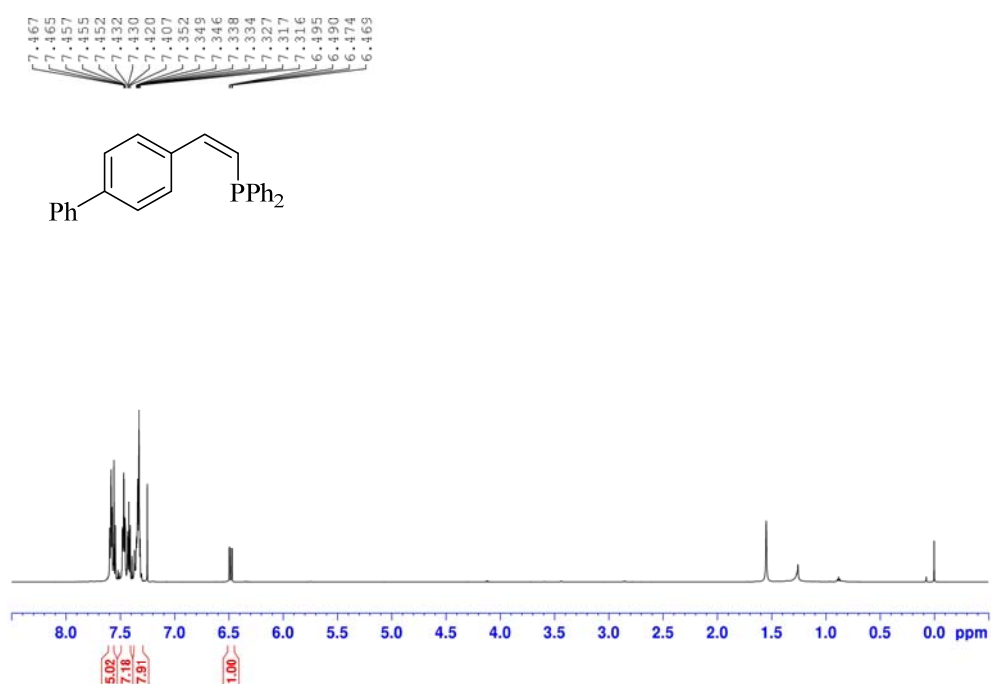

**Figure S24.**  $^1\text{H}$  NMR spectrum of compound **2k**

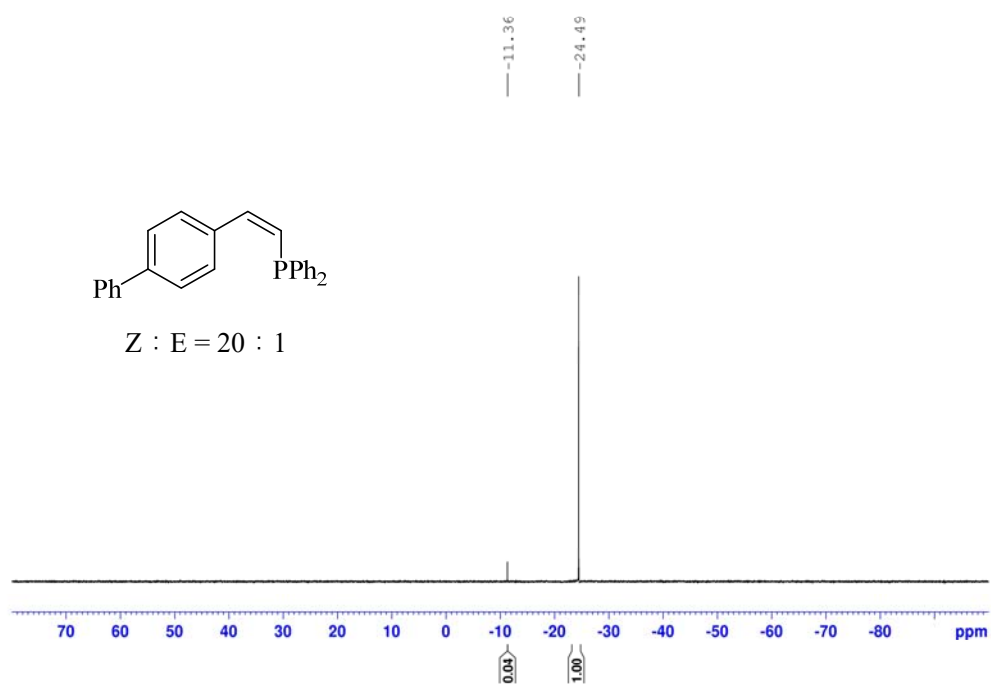

**Figure S25.**  $^{31}\text{P}$  NMR spectrum of compound **2k**

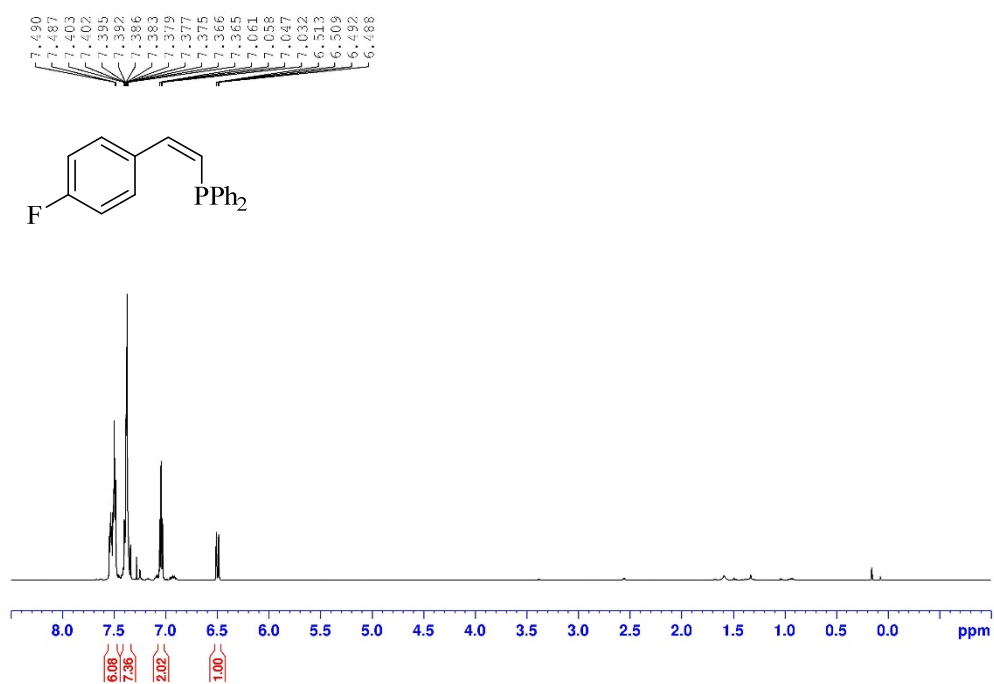

Figure S26. <sup>1</sup>H NMR spectrum of compound 21

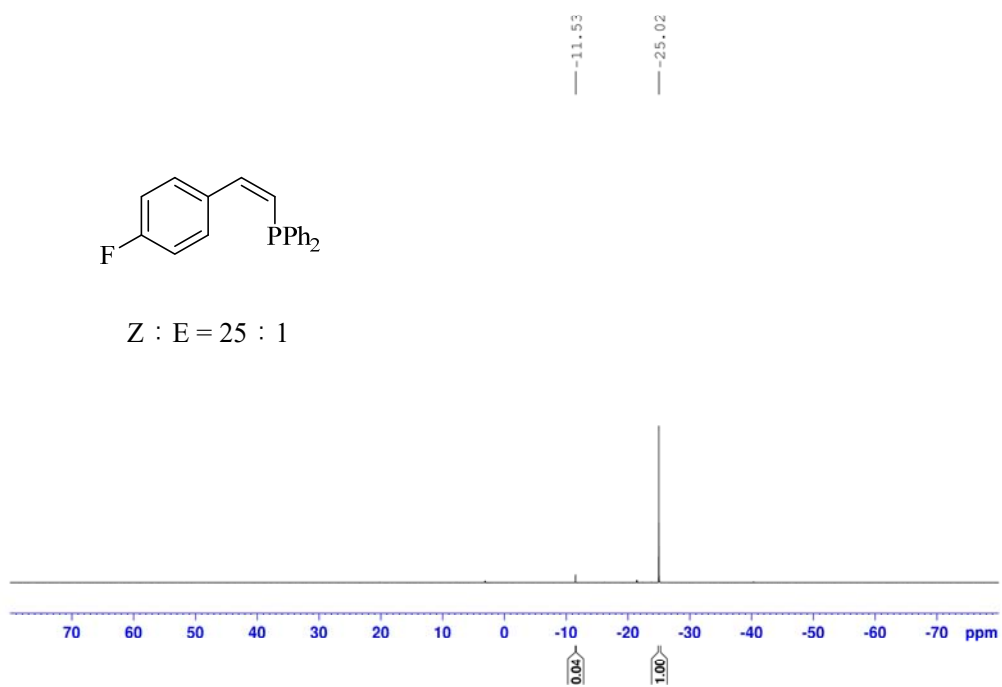

Figure S27. <sup>31</sup>P NMR spectrum of compound 21

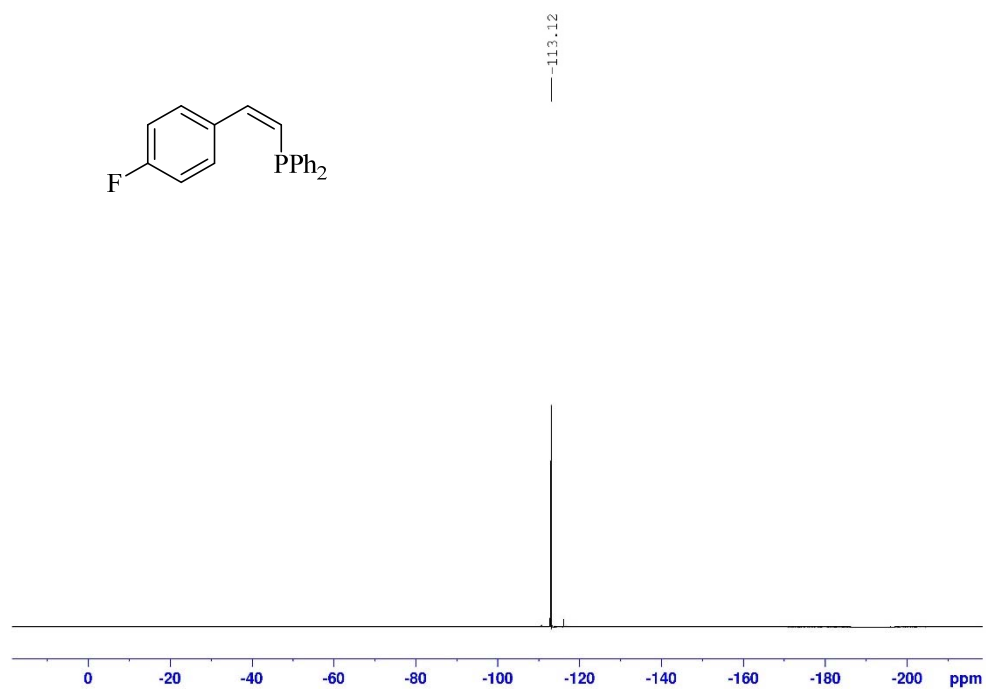

**Figure S28.**  $^{19}\text{F}$  NMR spectrum of compound **2l**

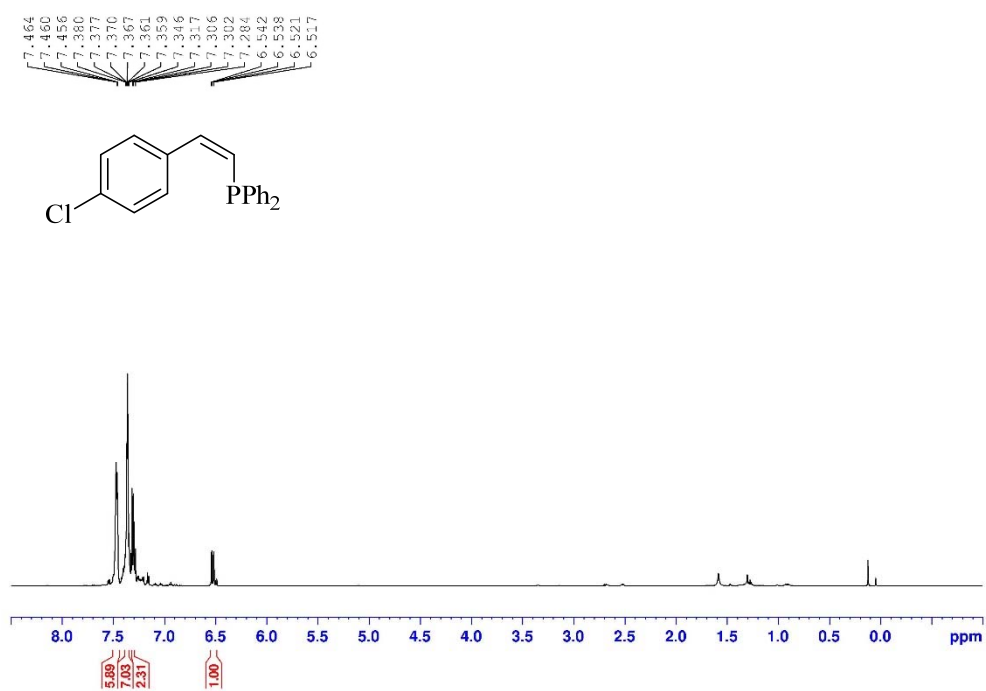

**Figure S29.**  $^1\text{H}$  NMR spectrum of compound **2m**

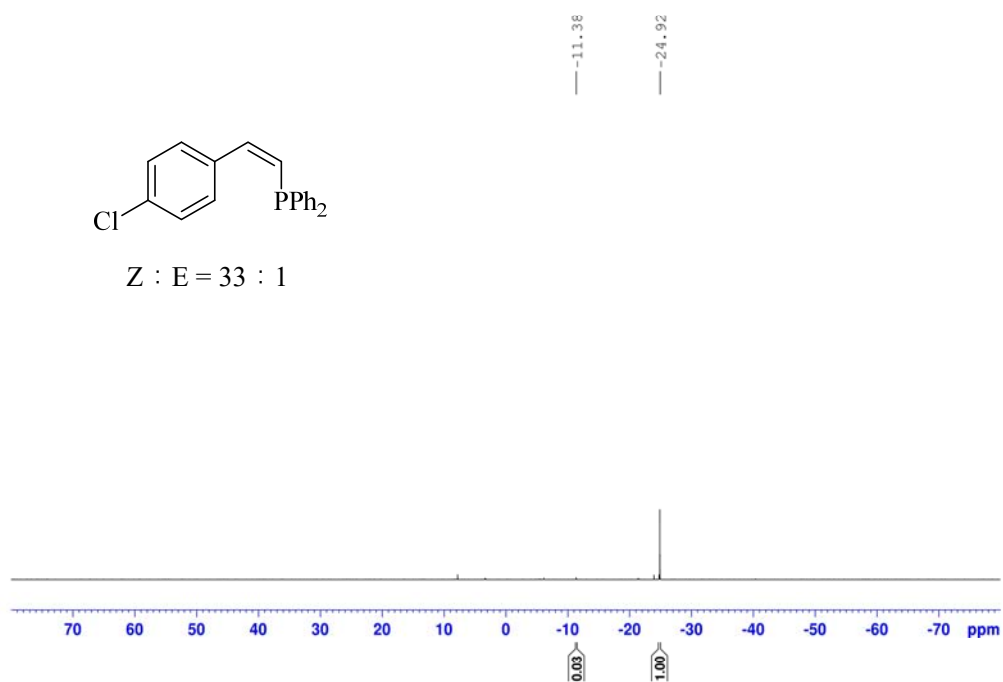

**Figure S30.**  $^{31}\text{P}$  NMR spectrum of compound **2m**

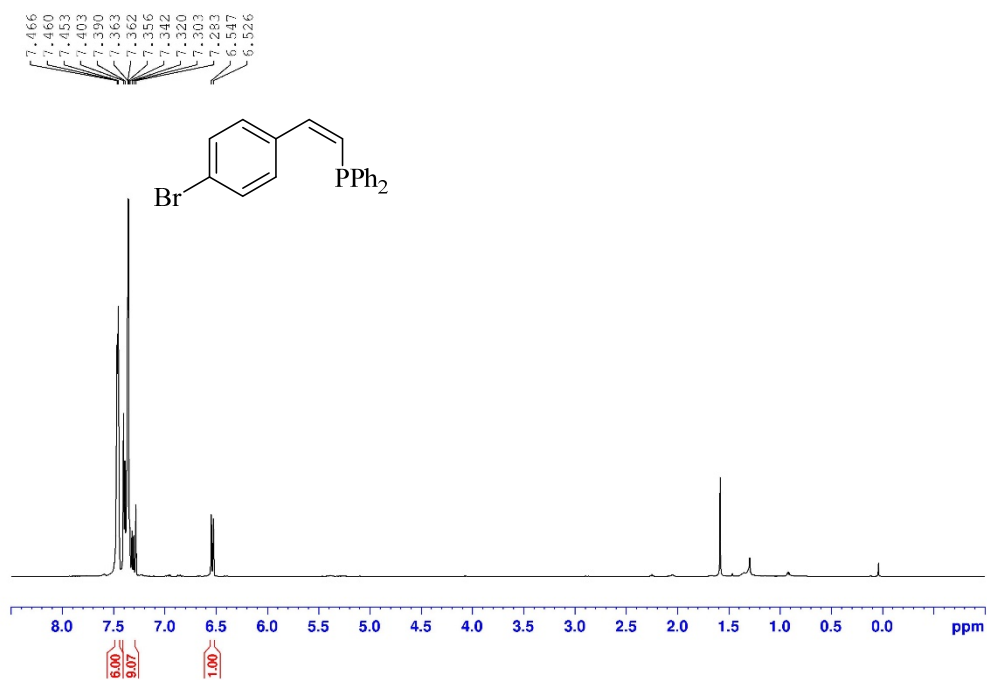

**Figure S31.**  $^1\text{H}$  NMR spectrum of compound **2n**

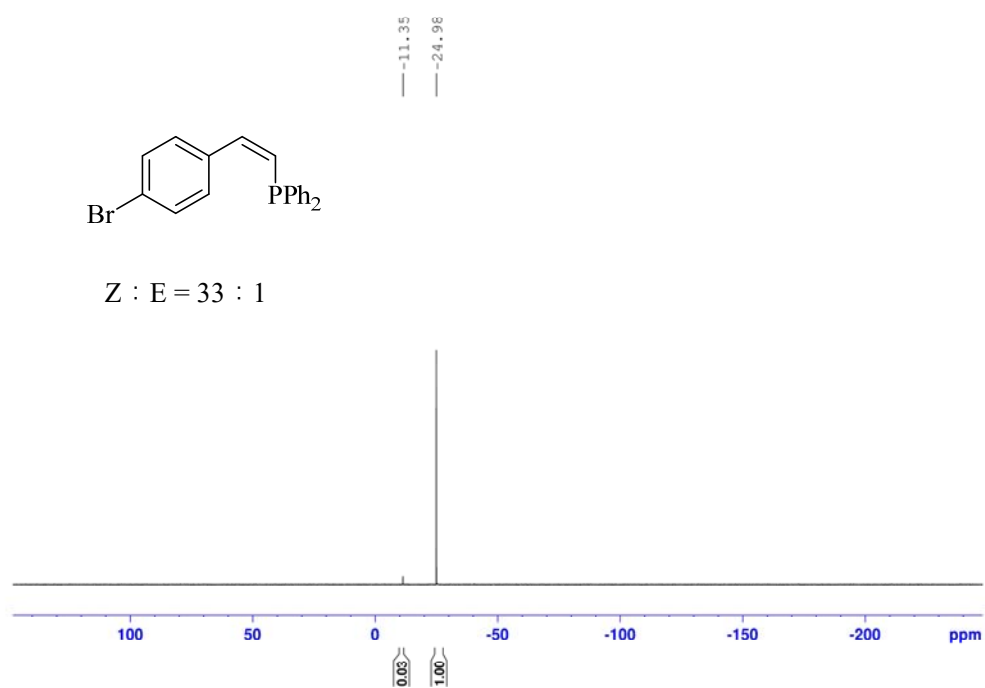

**Figure S32.** <sup>31</sup>P NMR spectrum of compound **2n**

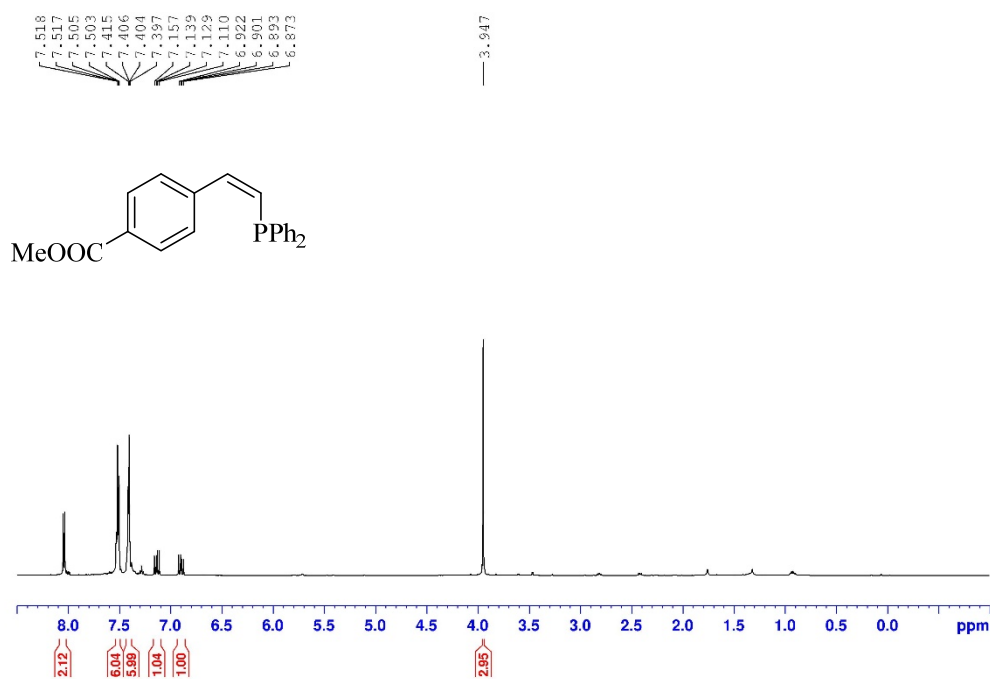

**Figure S33.** <sup>1</sup>H NMR spectrum of compound **2o**

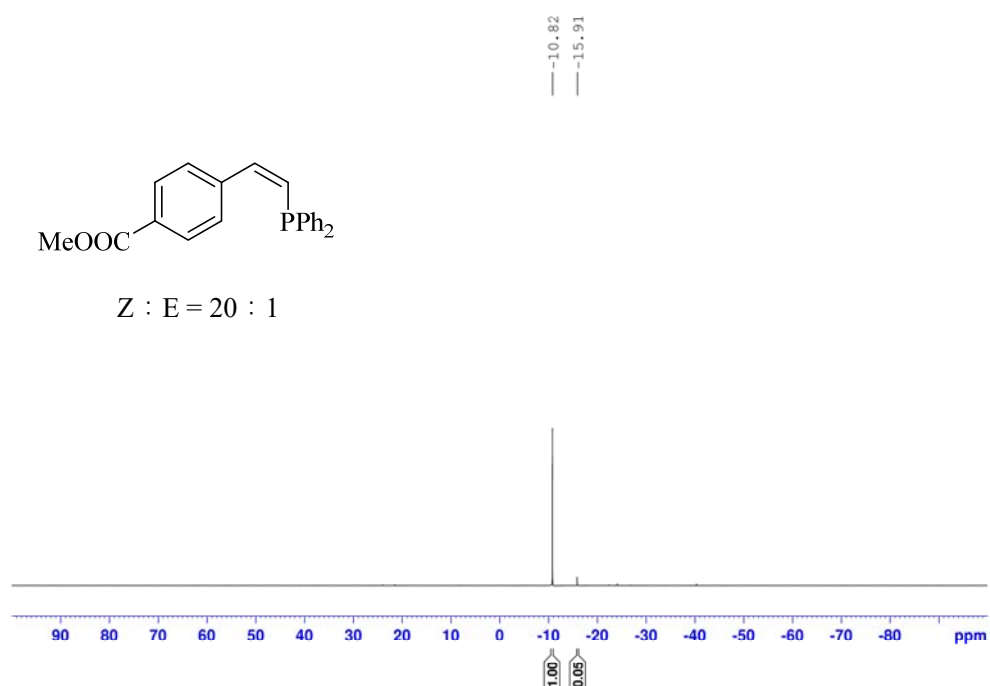

**Figure S34.**  $^{31}\text{P}$  NMR spectrum of compound **2o**

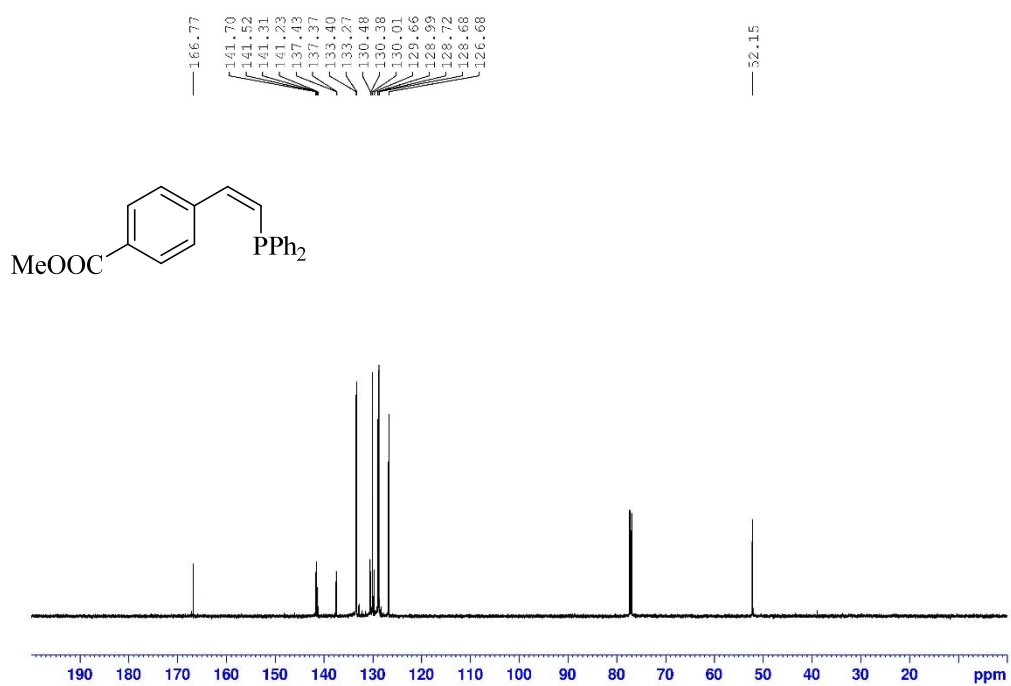

**Figure S35.**  $^{13}\text{C}$  NMR spectrum of compound **2o**



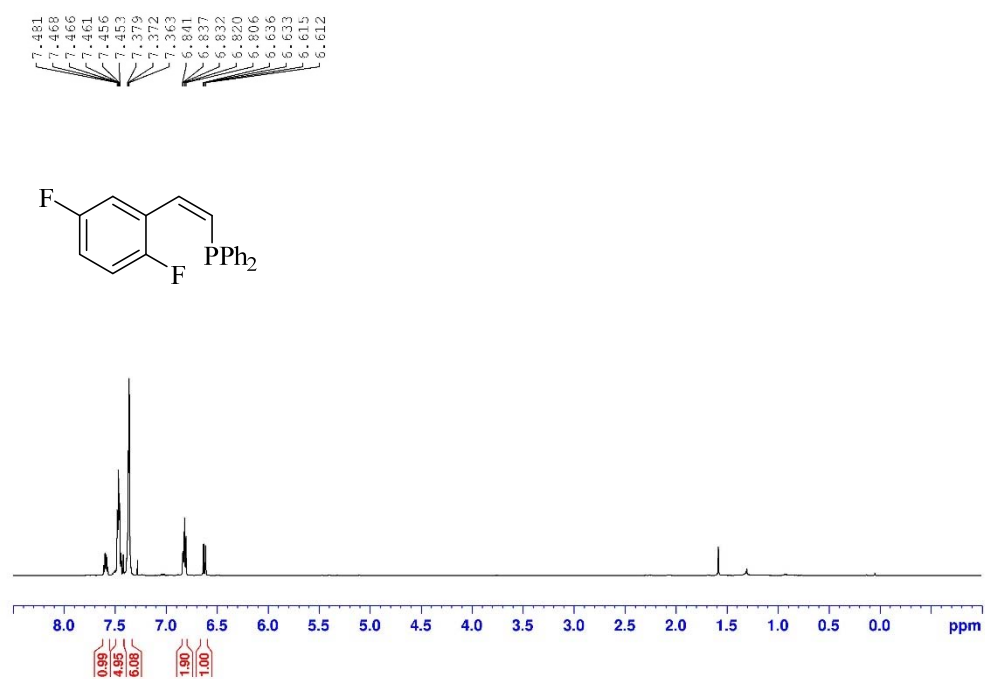

**Figure S36.** <sup>1</sup>H NMR spectrum of compound **2p**

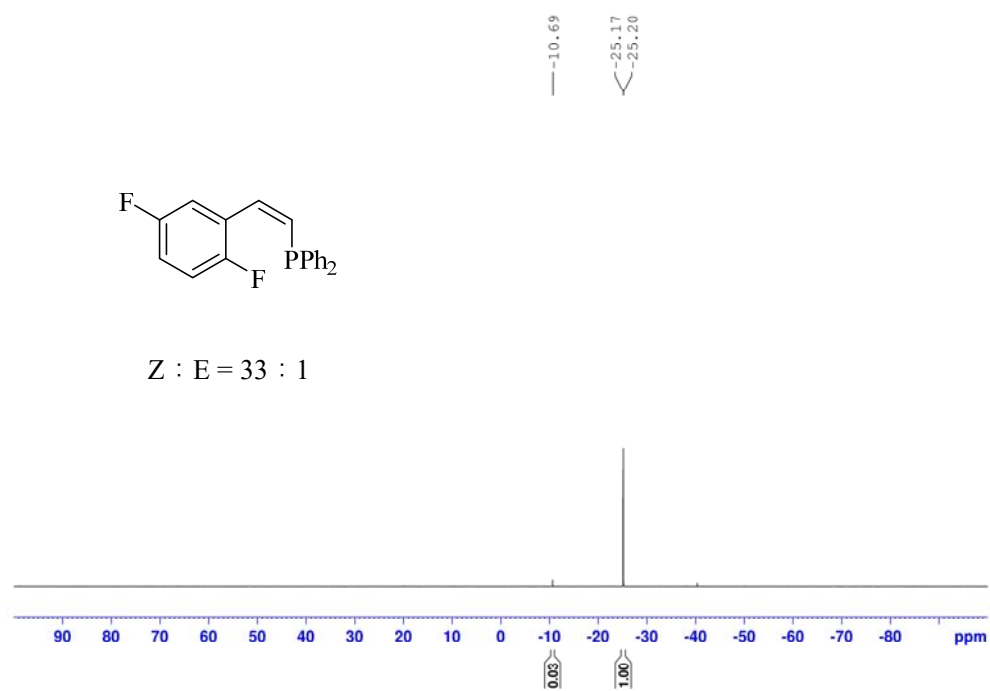

**Figure S37.** <sup>31</sup>P NMR spectrum of compound **2p**

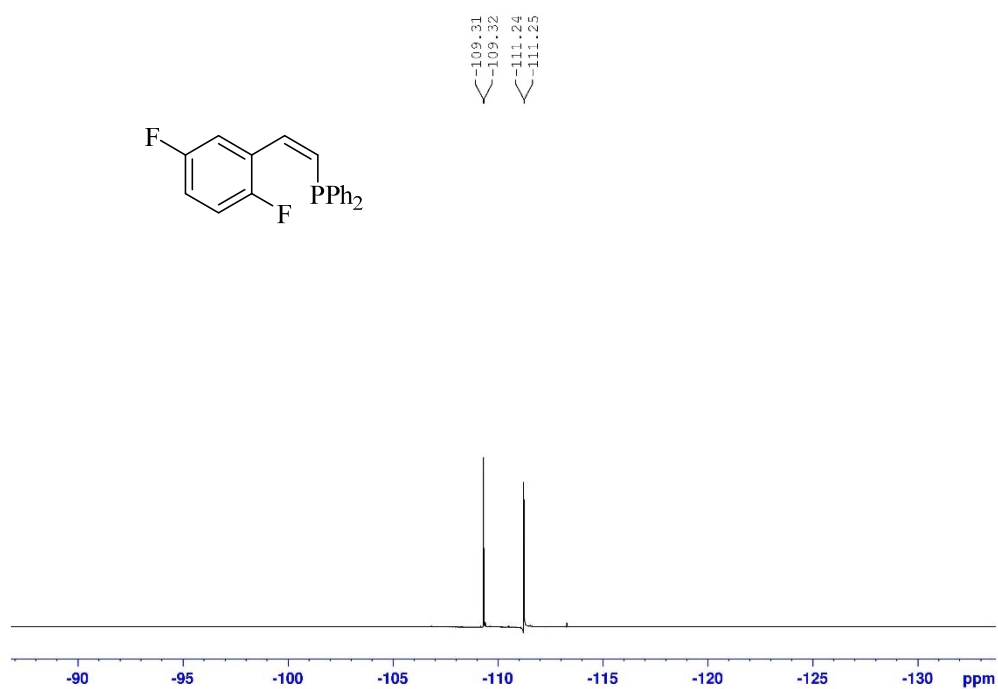

**Figure S38.**  $^{19}\text{F}$  NMR spectrum of compound 2p

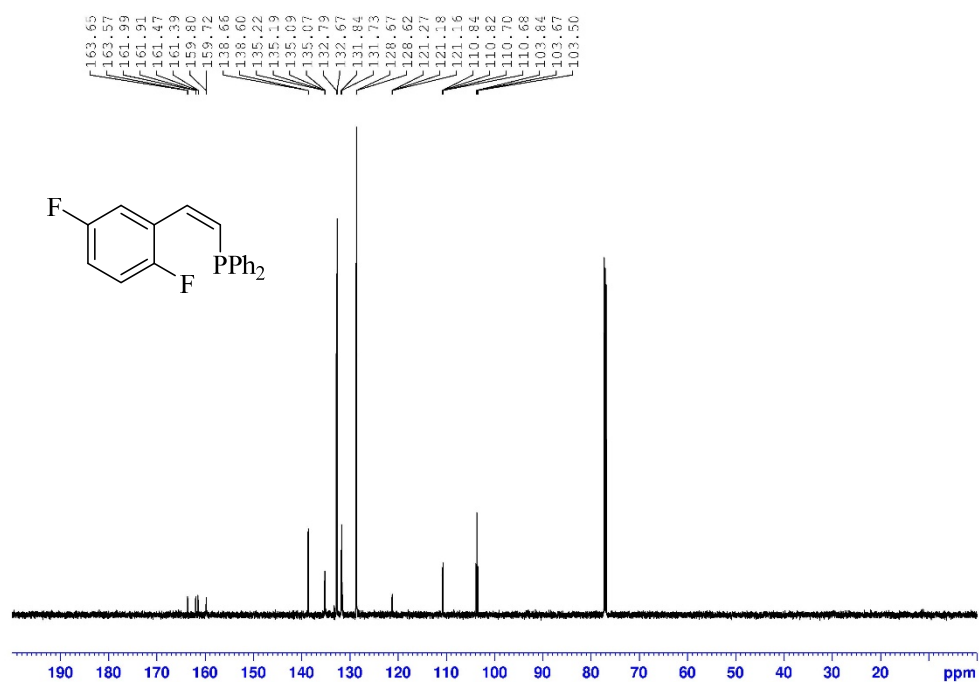

**Figure S39.**  $^{13}\text{C}$  NMR spectrum of compound 2p

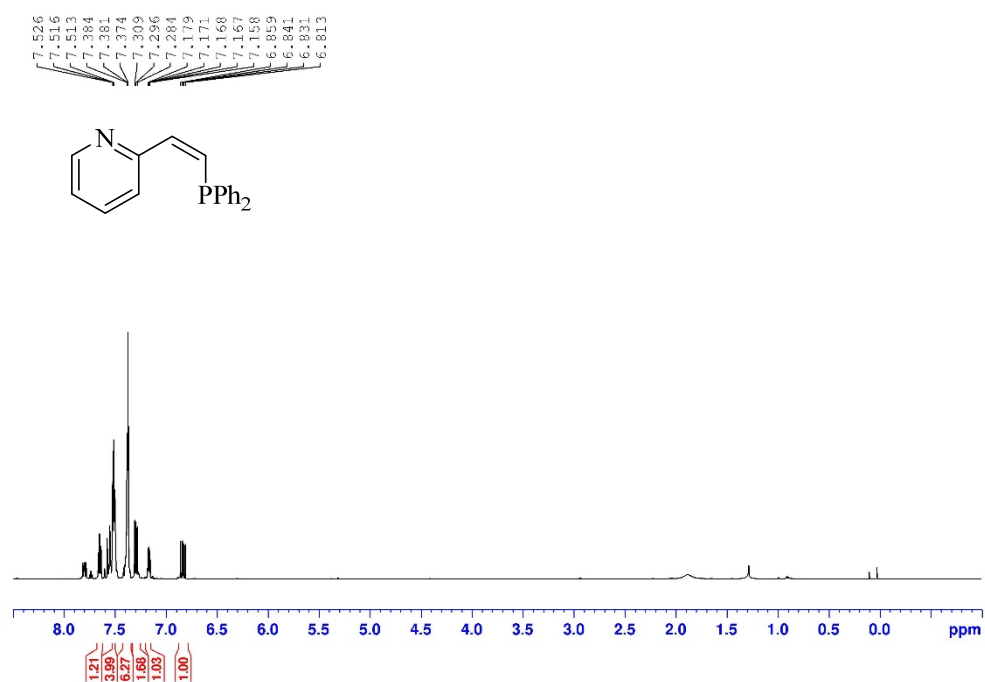

**Figure S40.** <sup>1</sup>H NMR spectrum of compound **2q**

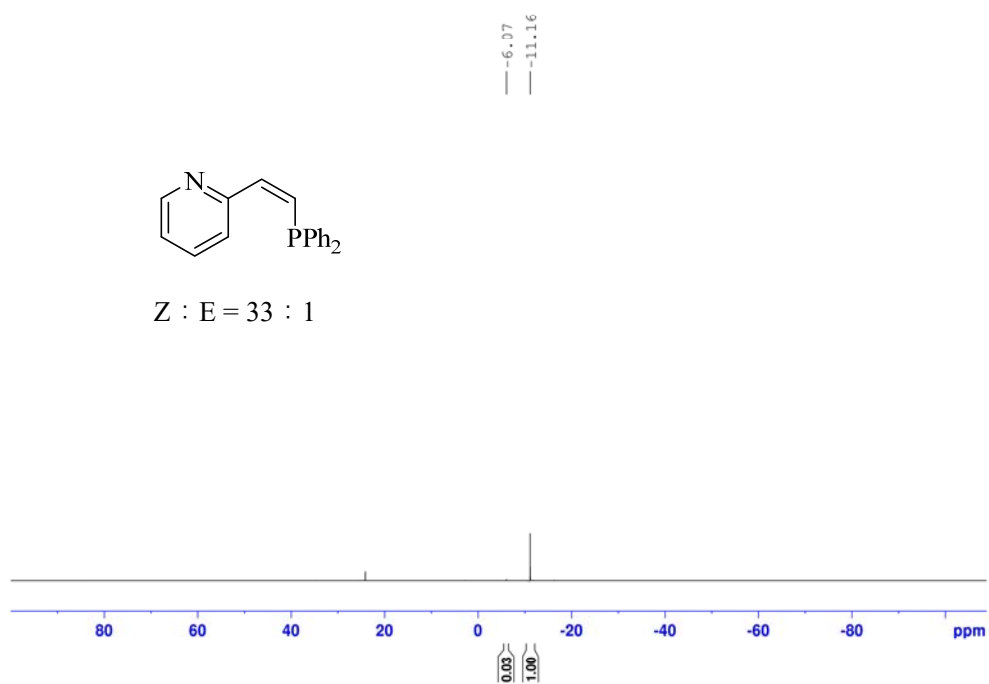

**Figure S41.** <sup>31</sup>P NMR spectrum of compound **2q**

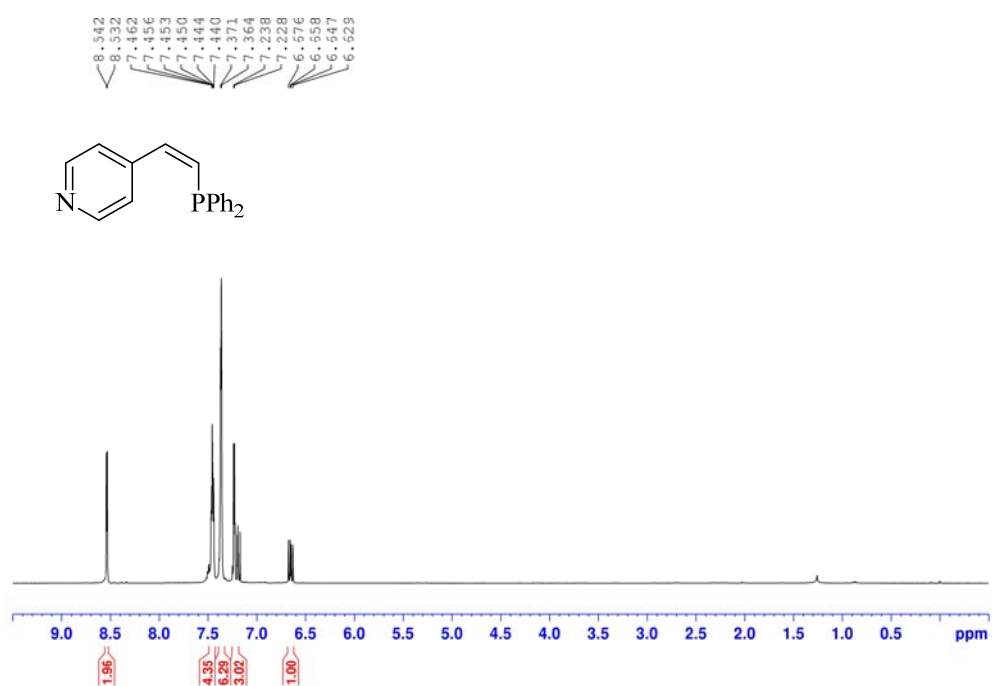

**Figure S42.** <sup>1</sup>H NMR spectrum of compound **2r**

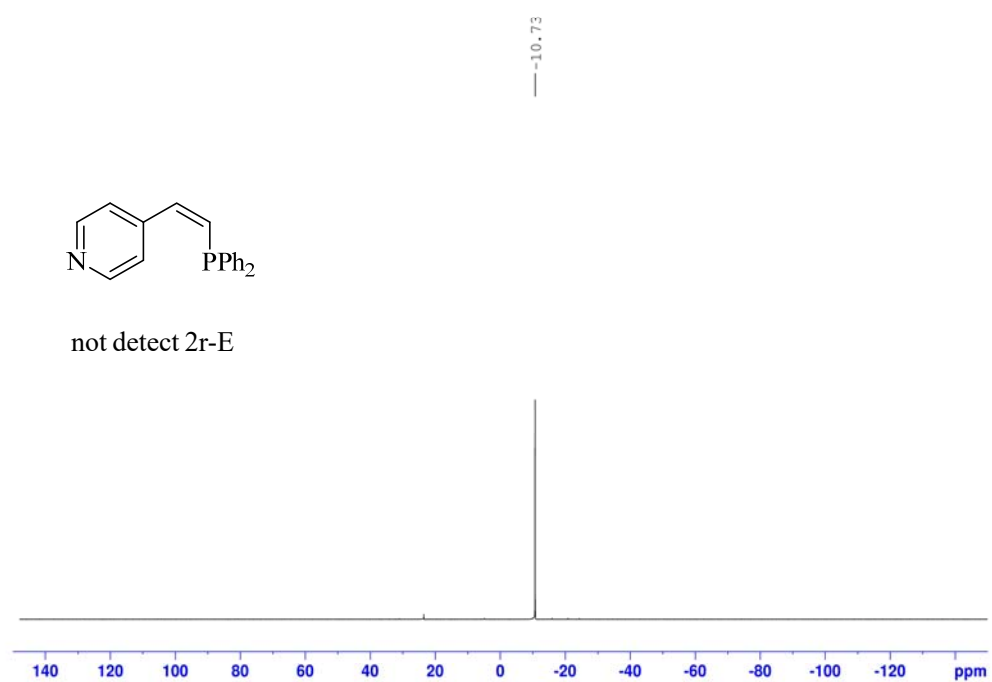

**Figure S43.** <sup>31</sup>P NMR spectrum of compound **2r**

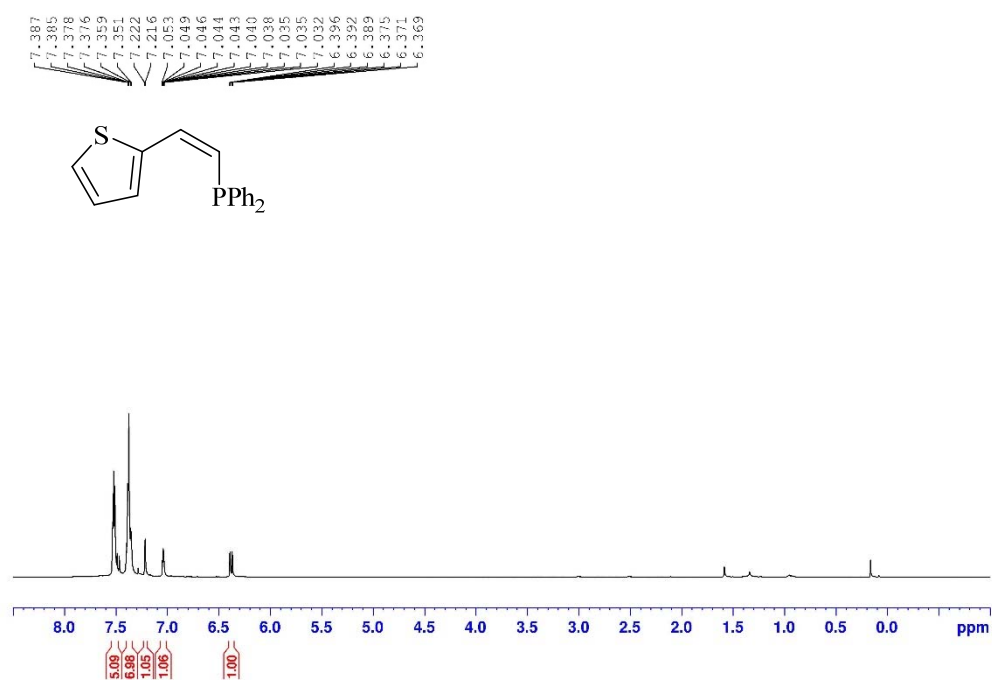

**Figure S44.** <sup>1</sup>H NMR spectrum of compound **2s**

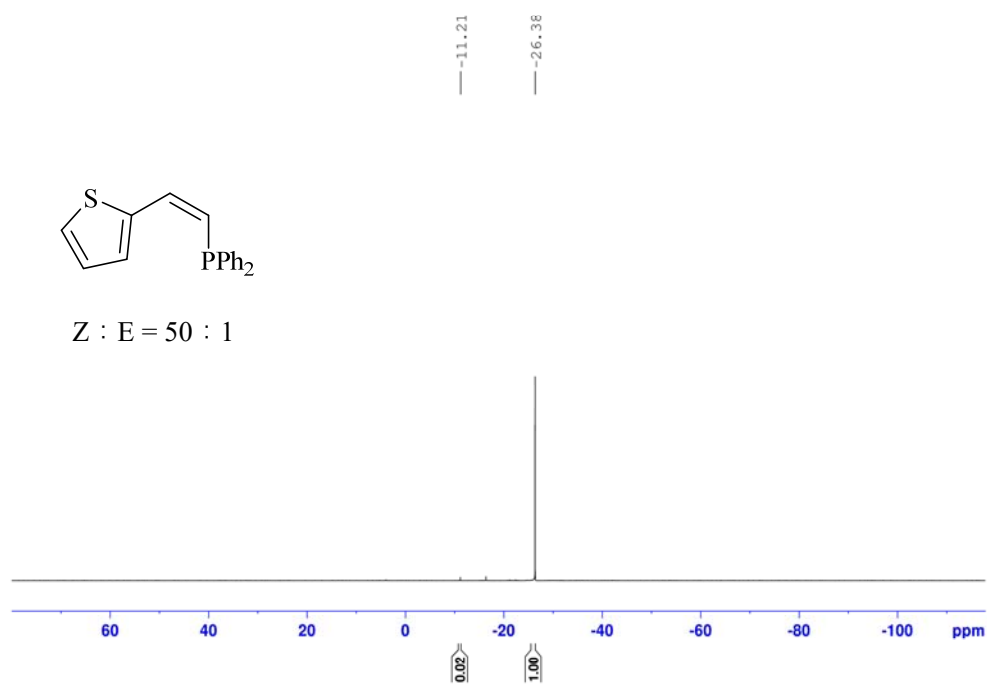

**Figure S45.** <sup>31</sup>P NMR spectrum of compound **2s**

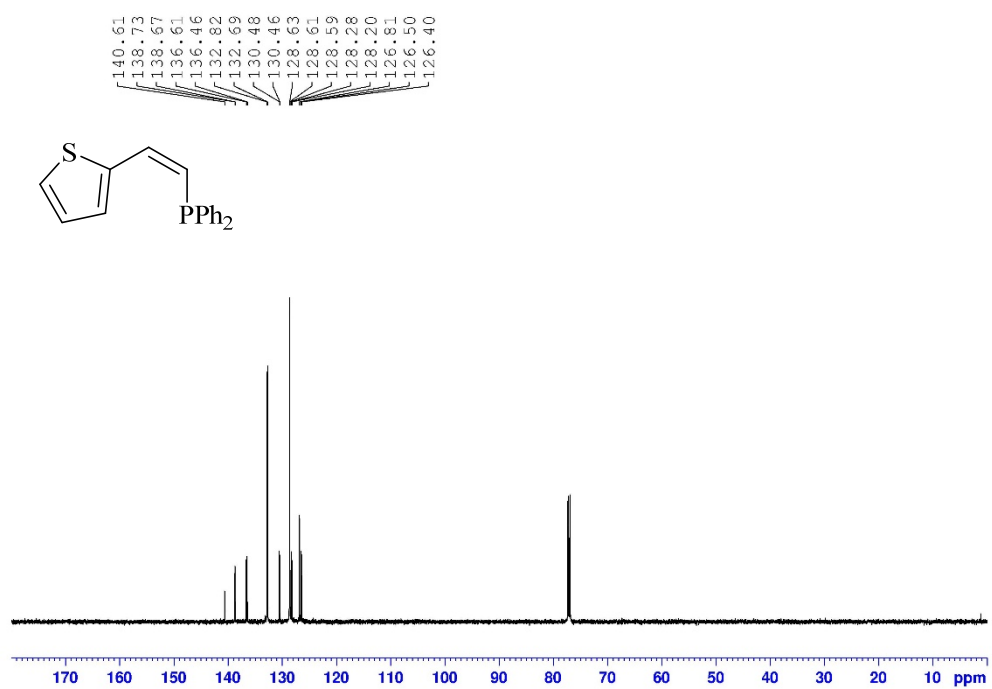

Figure S46. <sup>13</sup>C NMR spectrum of compound 2s

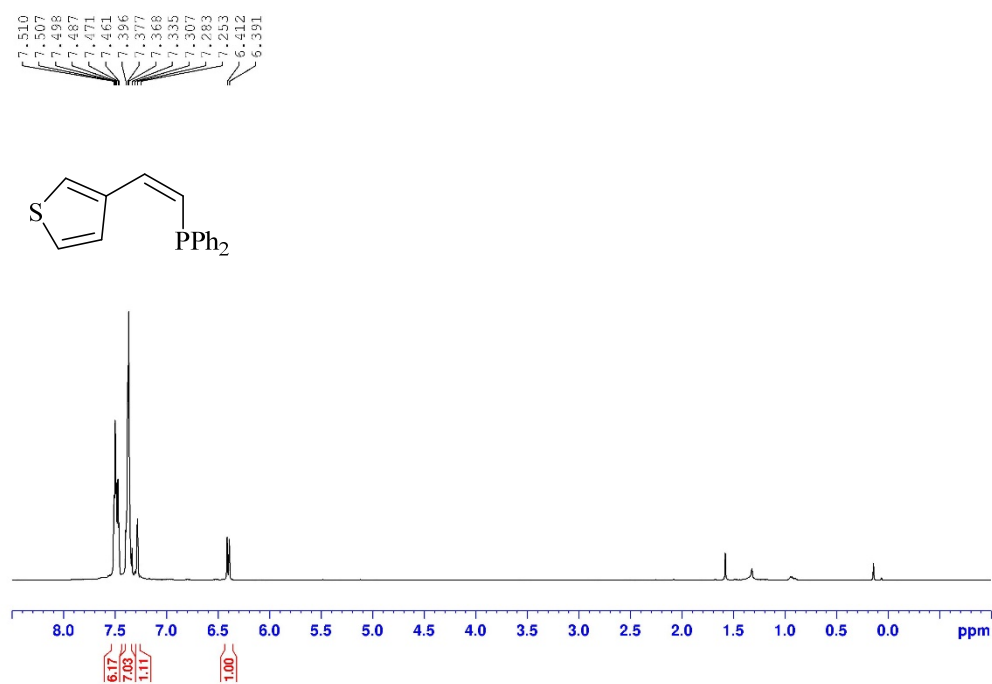

Figure S47. <sup>1</sup>H NMR spectrum of compound 2t

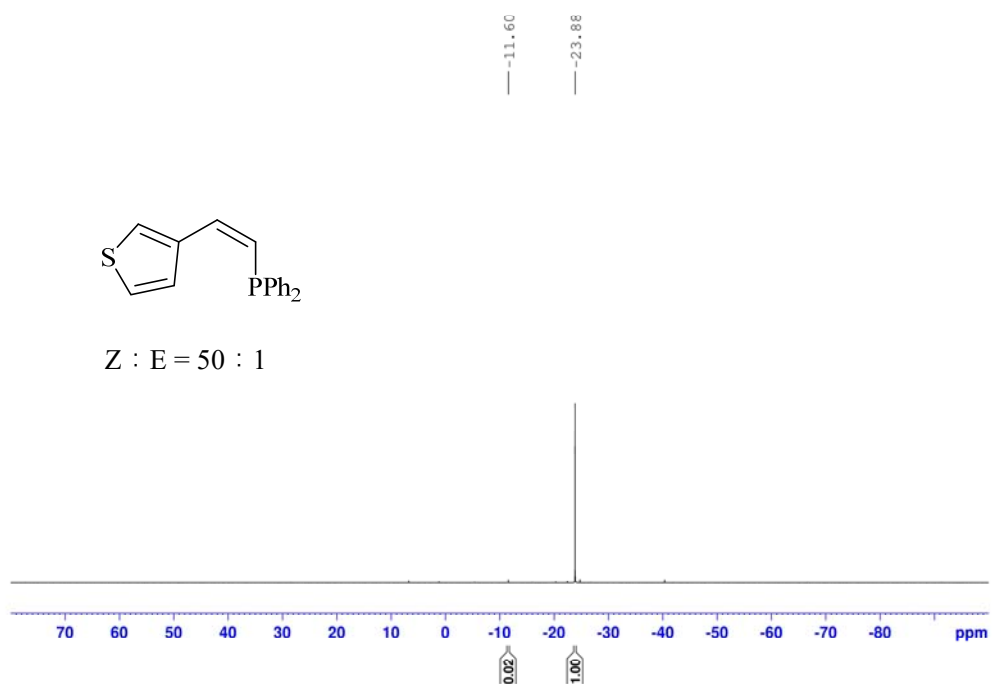

**Figure S48.** <sup>31</sup>P NMR spectrum of compound **2t**

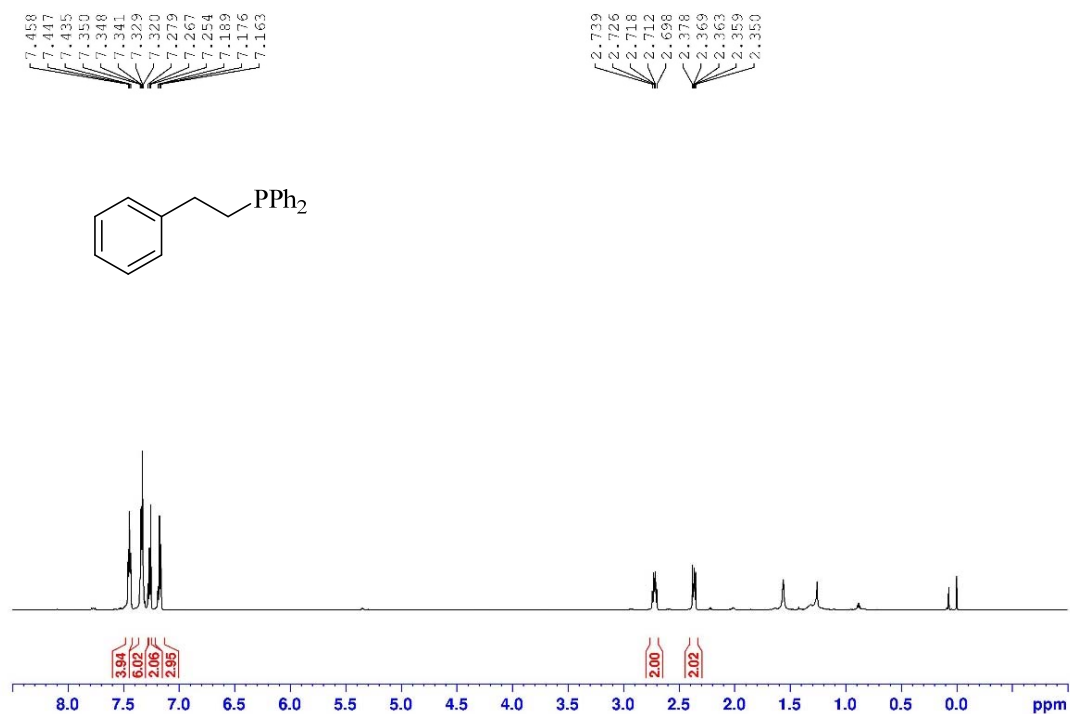

**Figure S49.** <sup>1</sup>H NMR spectrum of compound **4a**

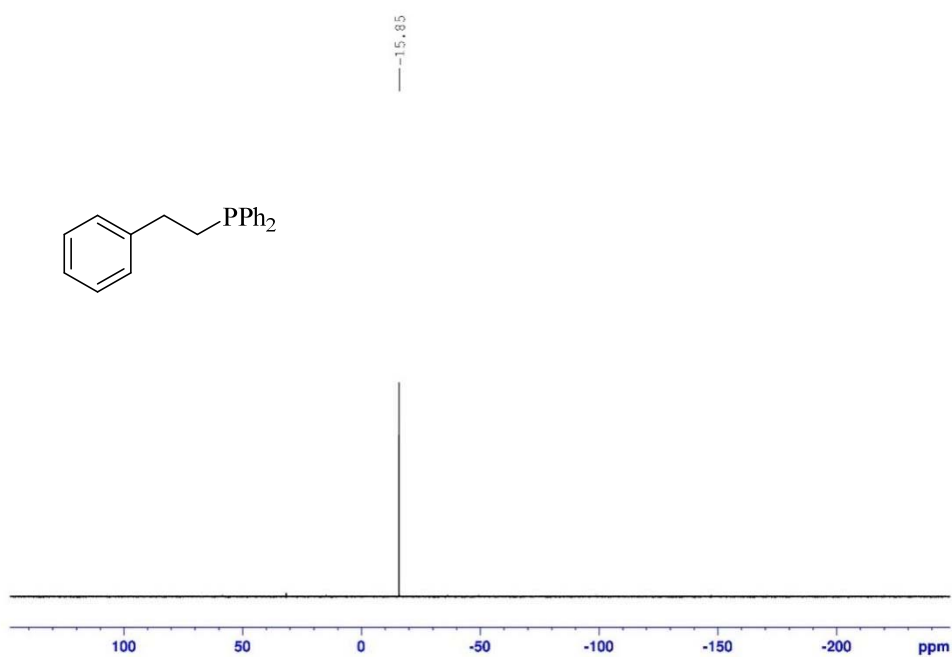

Figure S50.  $^{31}\text{P}$  NMR spectrum of compound 4a

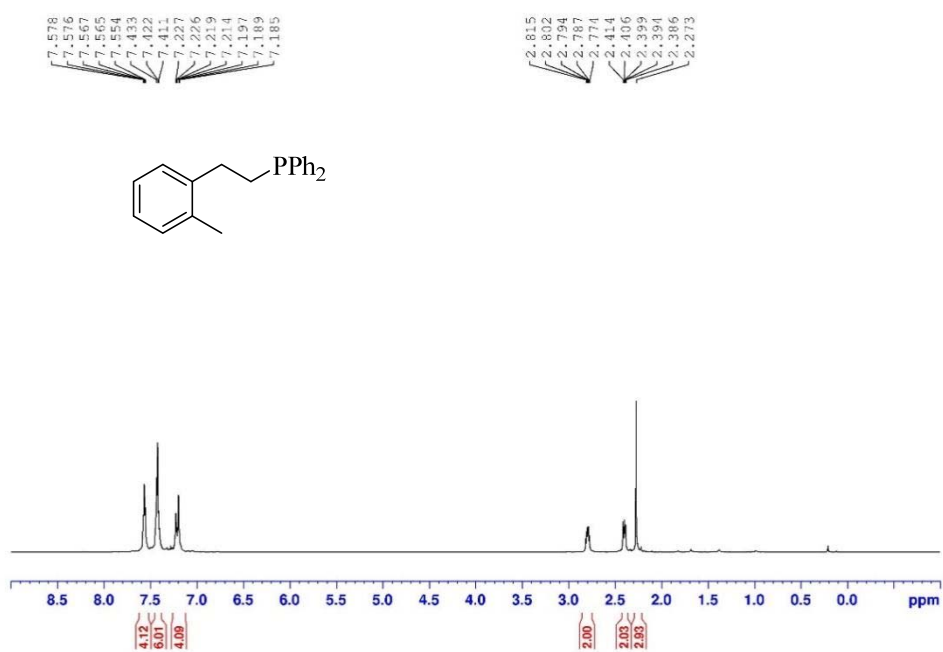

Figure S51.  $^1\text{H}$  NMR spectrum of compound 4b



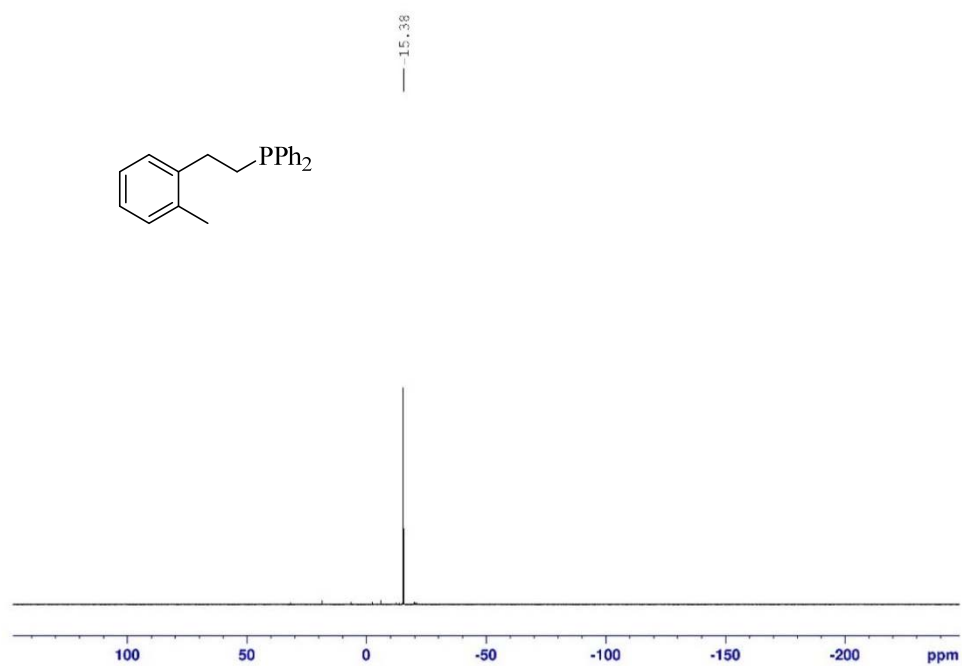

Figure S52.  $^{31}\text{P}$  NMR spectrum of compound 4b

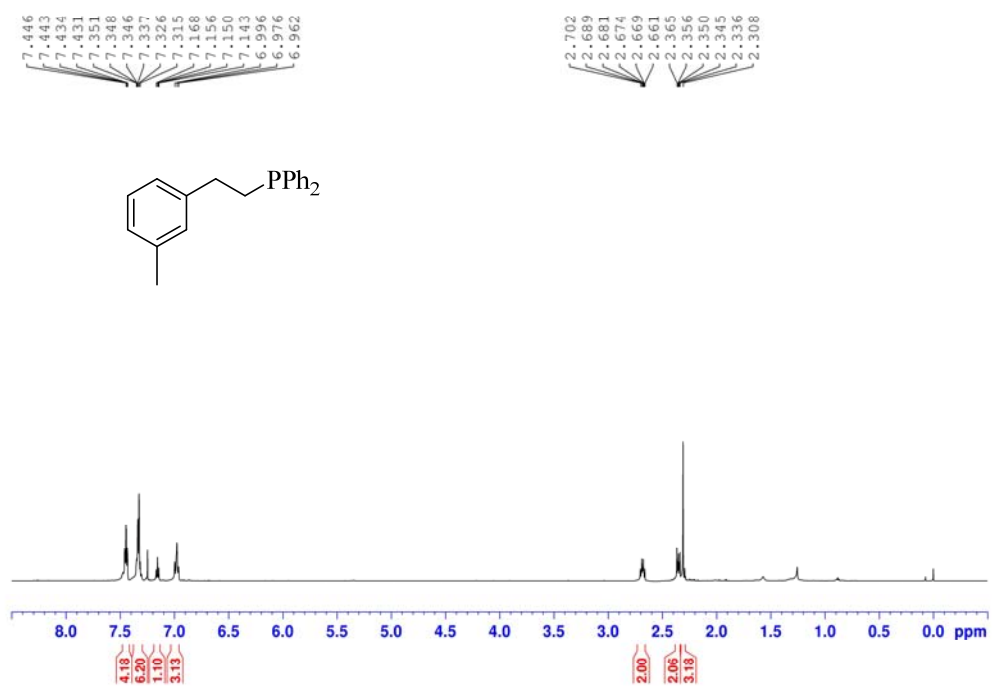

Figure S53.  $^1\text{H}$  NMR spectrum of compound 4c

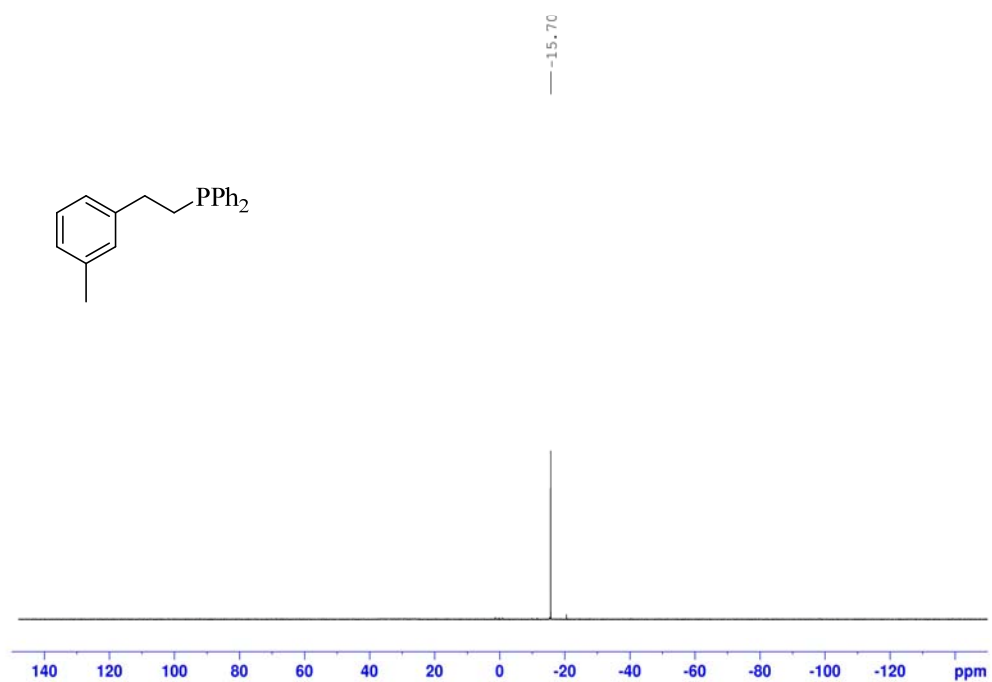

Figure S54.  $^{31}\text{P}$  NMR spectrum of compound **4c**

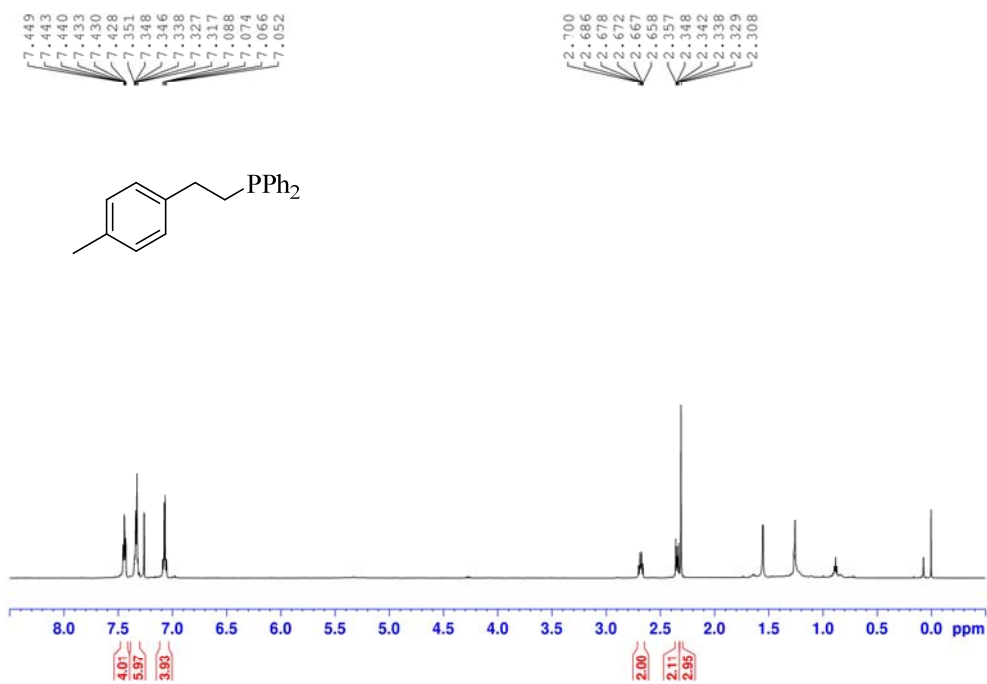

Figure S55.  $^1\text{H}$  NMR spectrum of compound **4d**

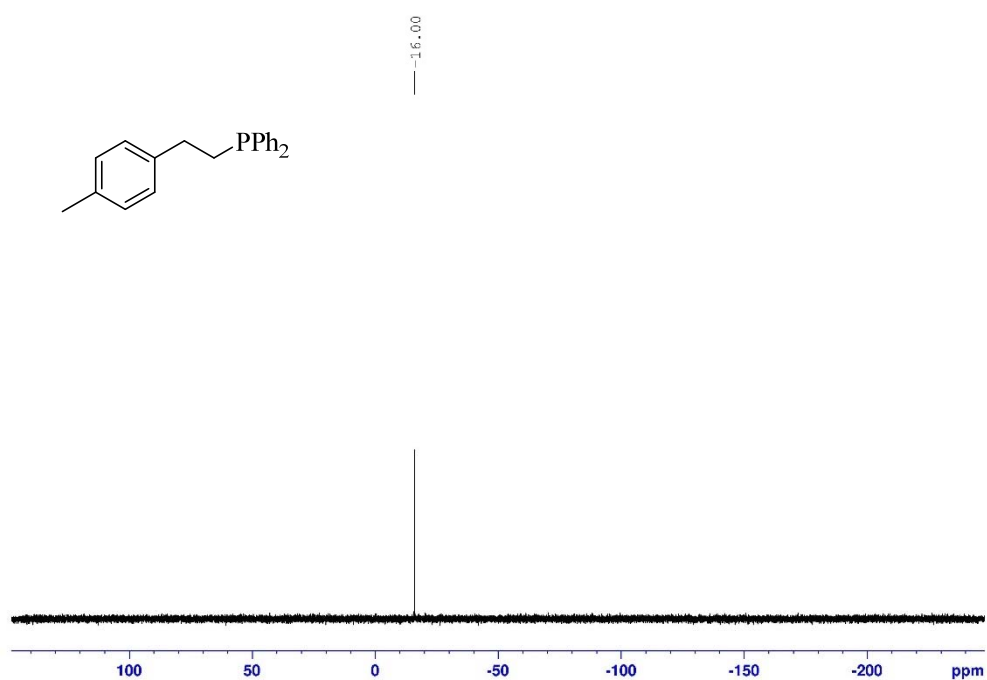

Figure S56.  $^{31}\text{P}$  NMR spectrum of compound 4d

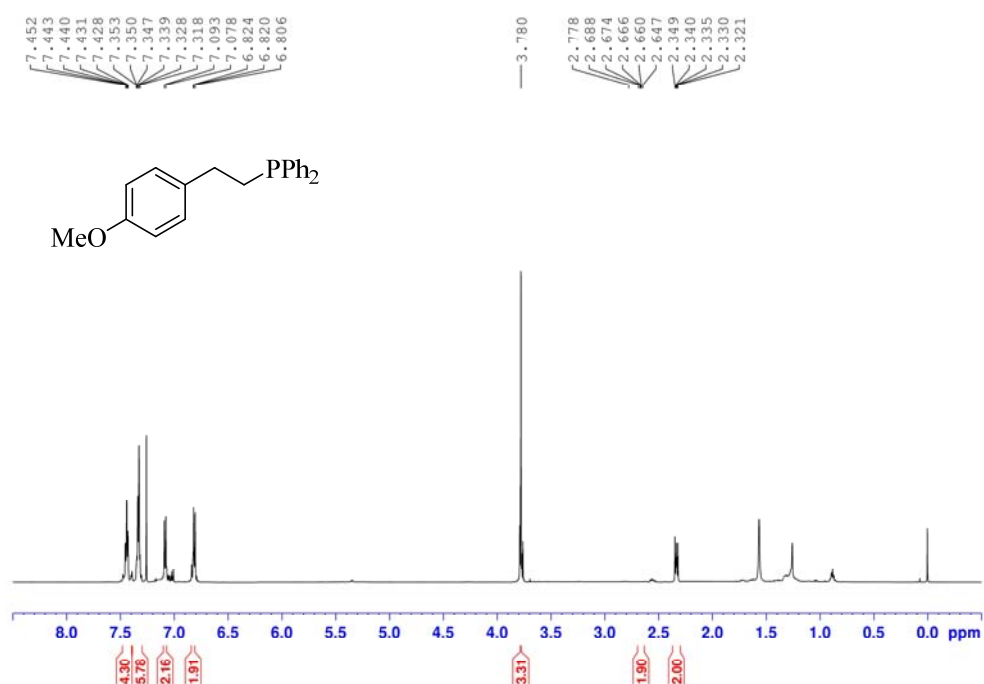

Figure S57.  $^1\text{H}$  NMR spectrum of compound 4e

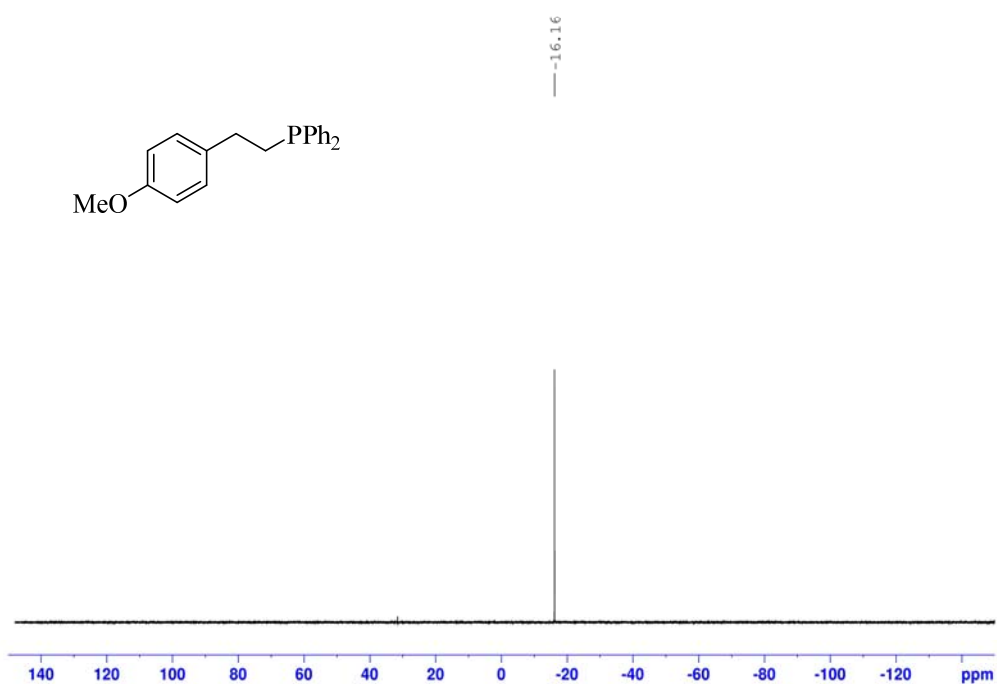

Figure S58.  $^{31}\text{P}$  NMR spectrum of compound 4e

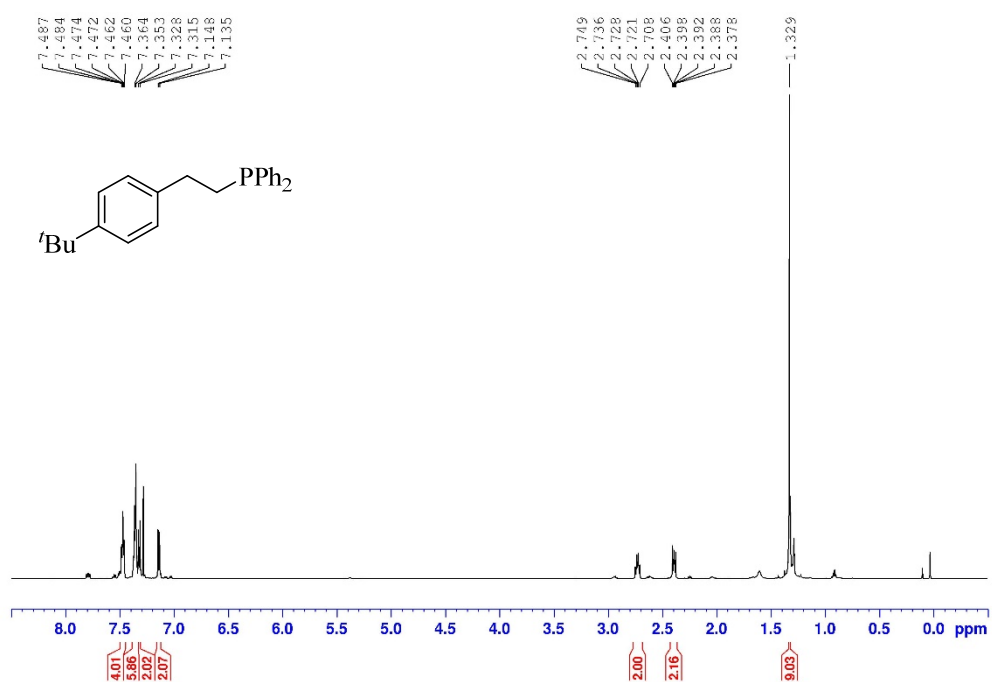

Figure S59.  $^1\text{H}$  NMR spectrum of compound 4f

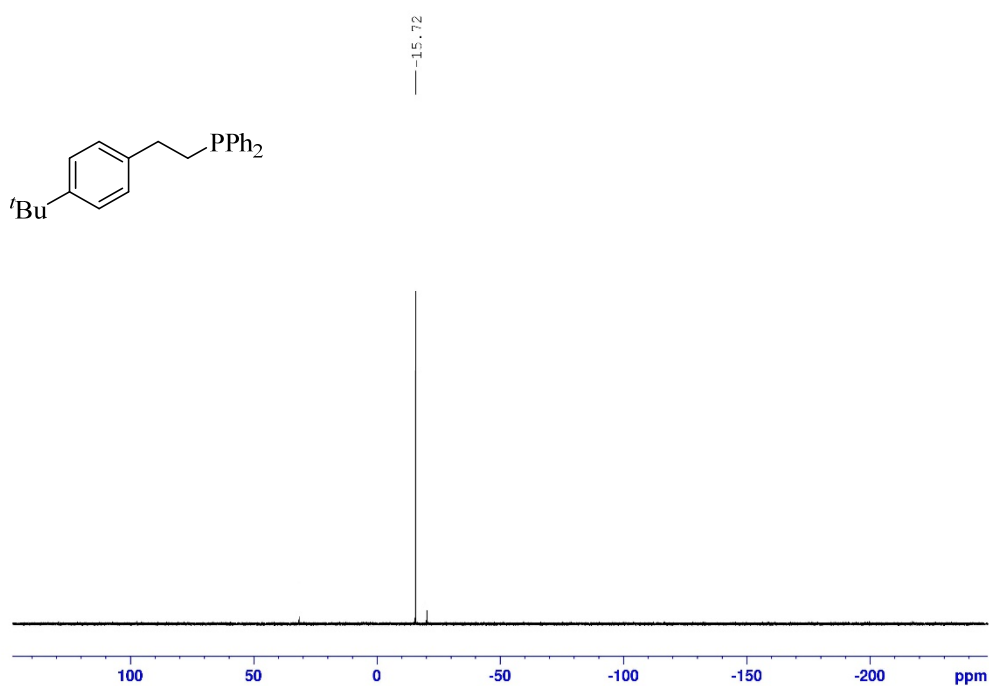

Figure S60. <sup>31</sup>P NMR spectrum of compound 4f

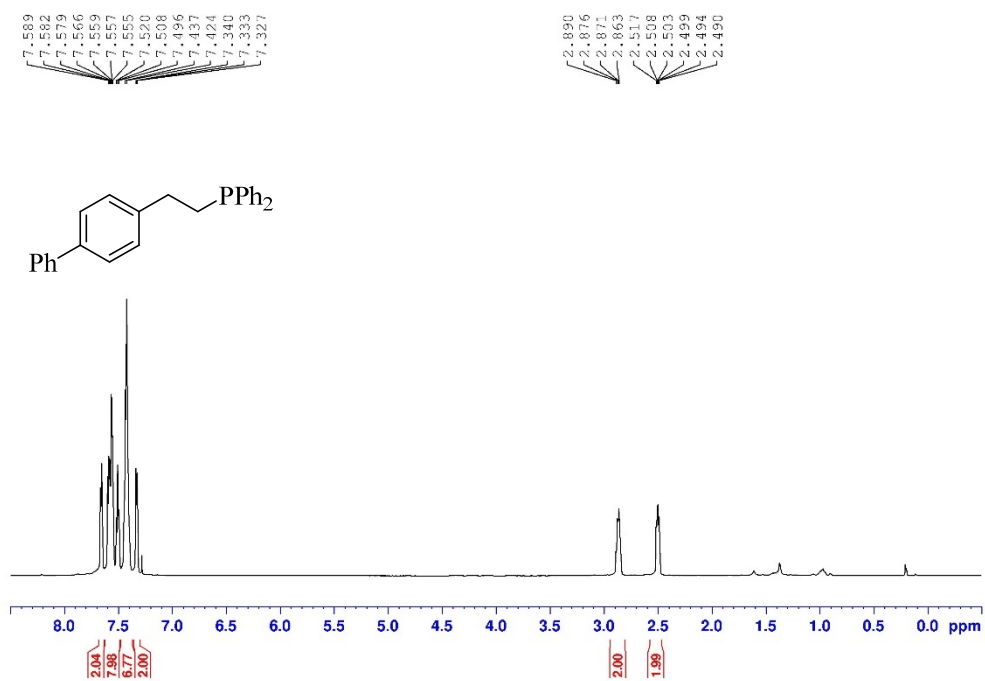

Figure S61. <sup>1</sup>H NMR spectrum of compound 4g

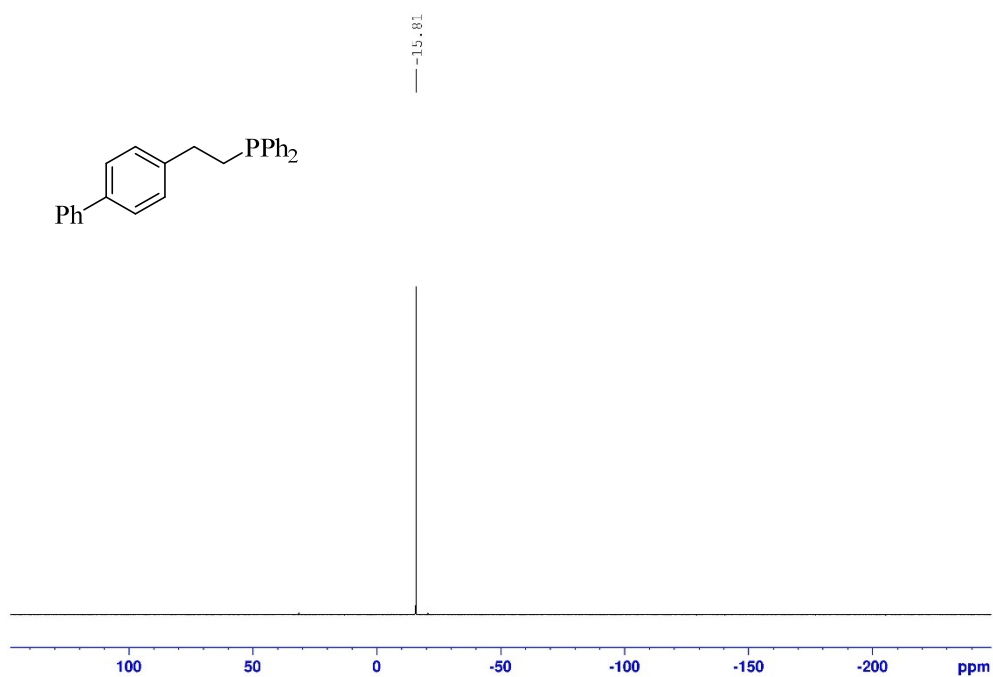

Figure S62.  $^{31}\text{P}$  NMR spectrum of compound **4g**

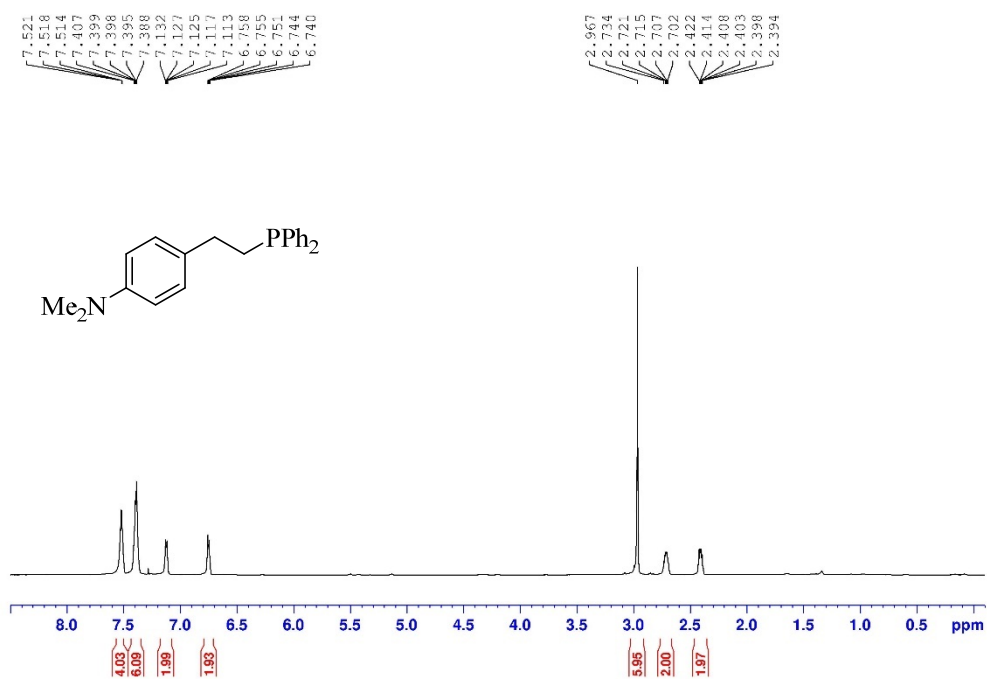

Figure S63.  $^1\text{H}$  NMR spectrum of compound **4h**

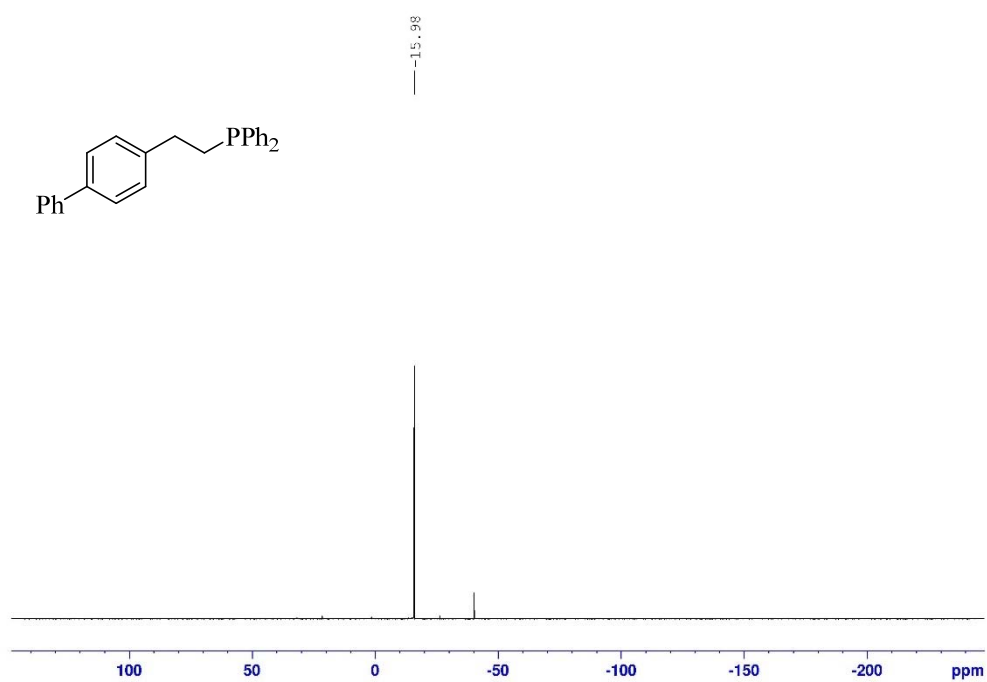

Figure S64.  $^{31}\text{P}$  NMR spectrum of compound 4h

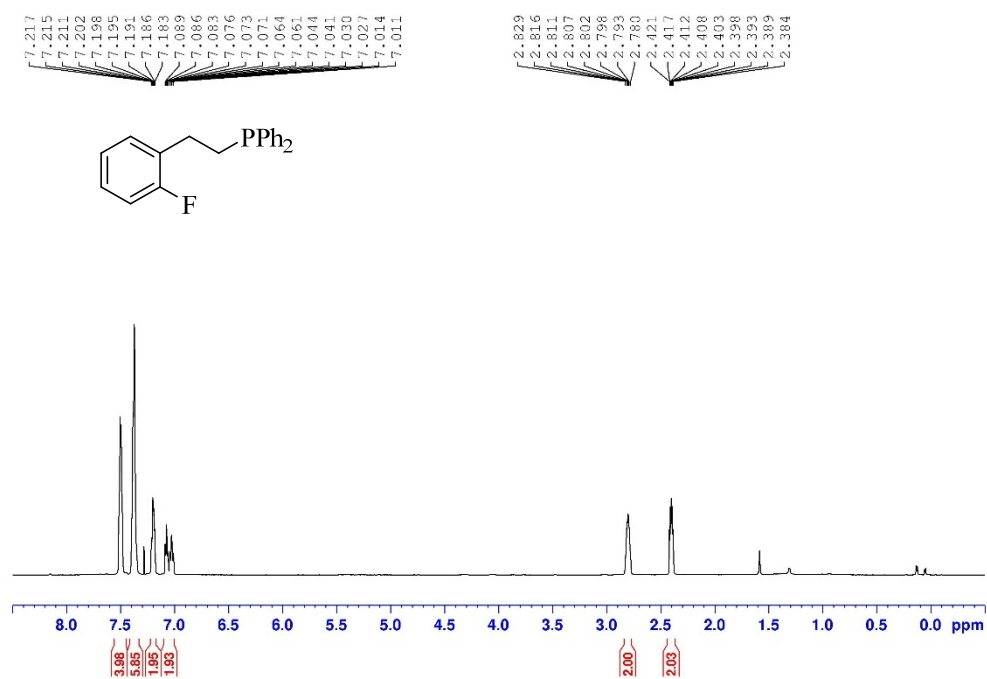

Figure S65.  $^1\text{H}$  NMR spectrum of compound 4i

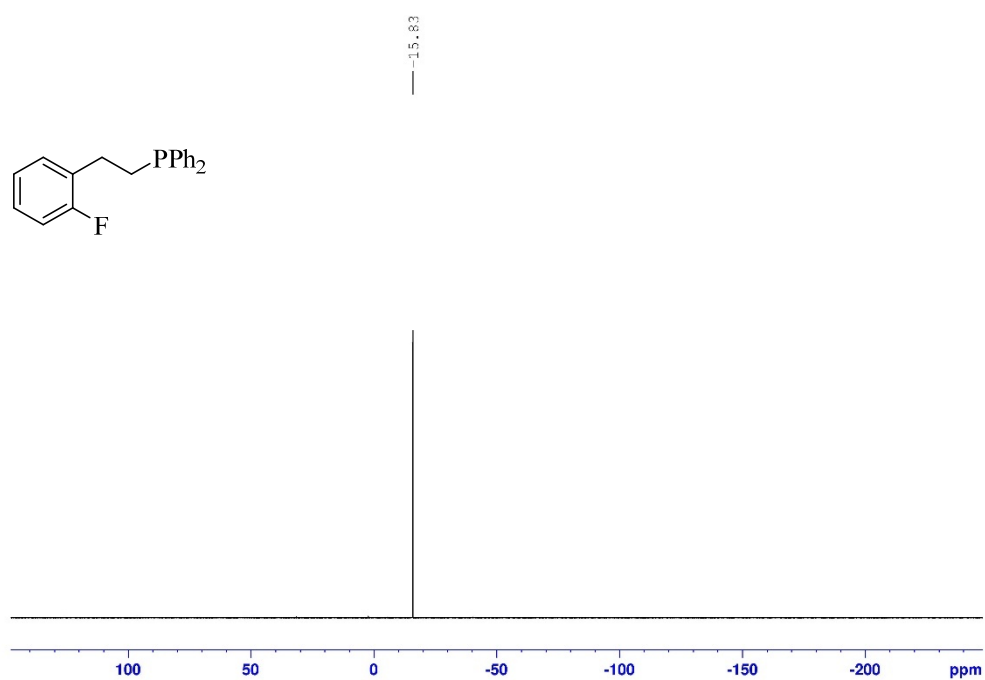

Figure S66.  $^{31}\text{P}$  NMR spectrum of compound 4i

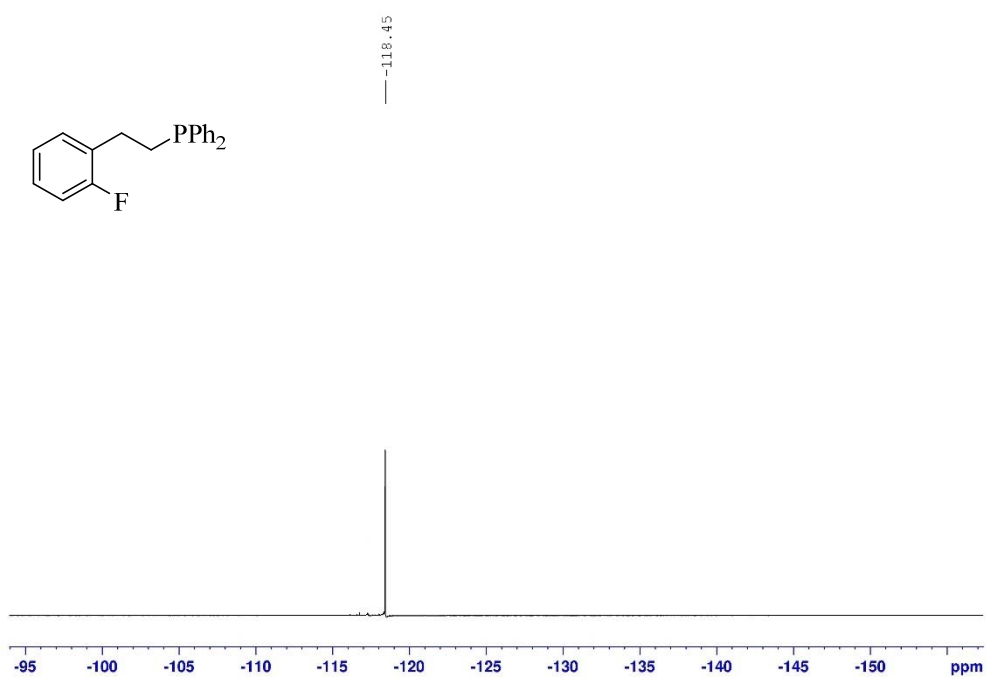

Figure S67.  $^{19}\text{F}$  NMR spectrum of compound 4i



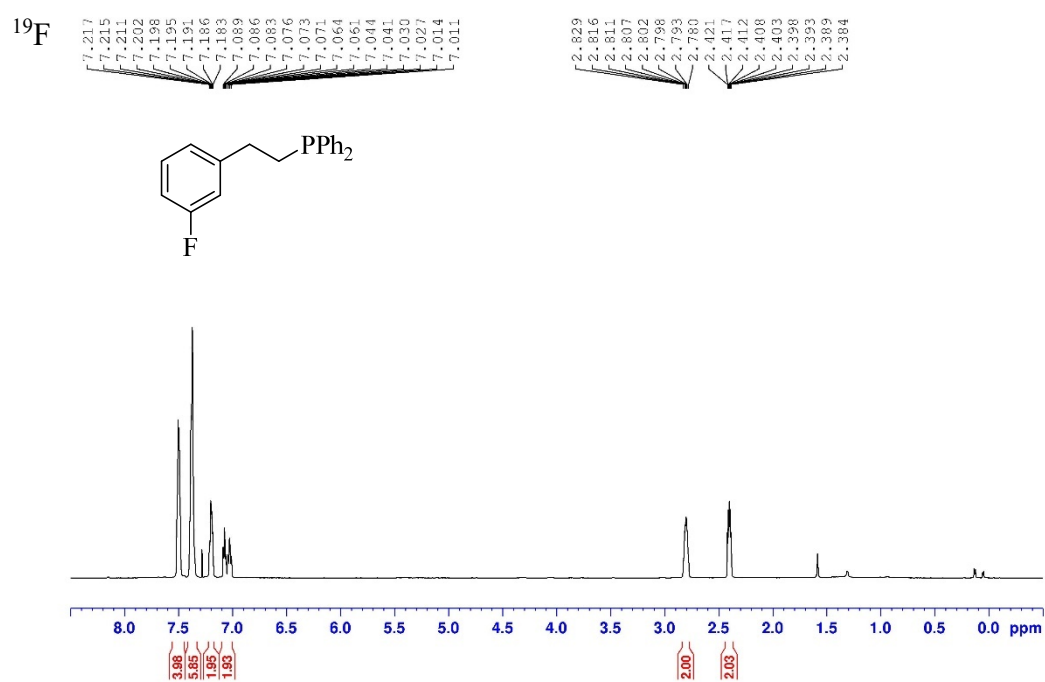

Figure S68. <sup>1</sup>H NMR spectrum of compound **4j**

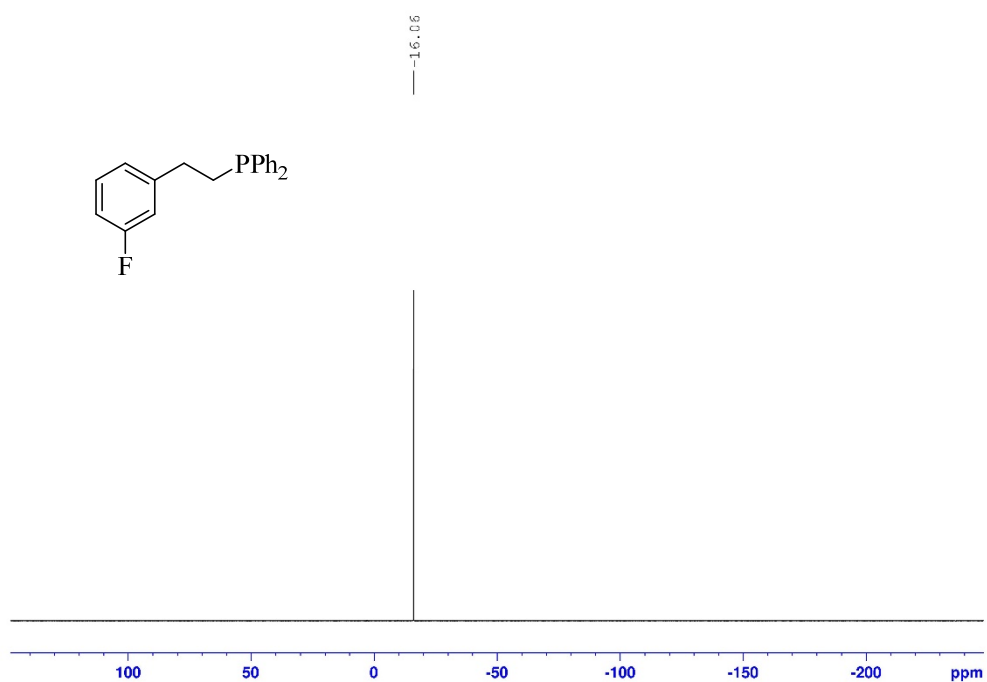

Figure S69. <sup>31</sup>P NMR spectrum of compound **4j**

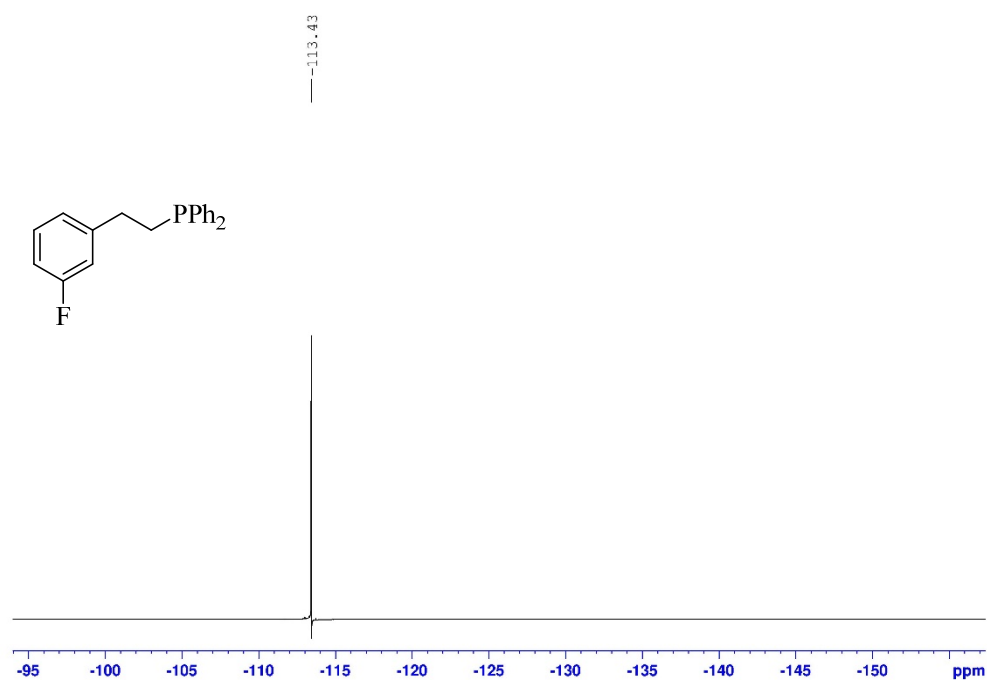

Figure S70.  $^{19}\text{F}$  NMR spectrum of compound 4j

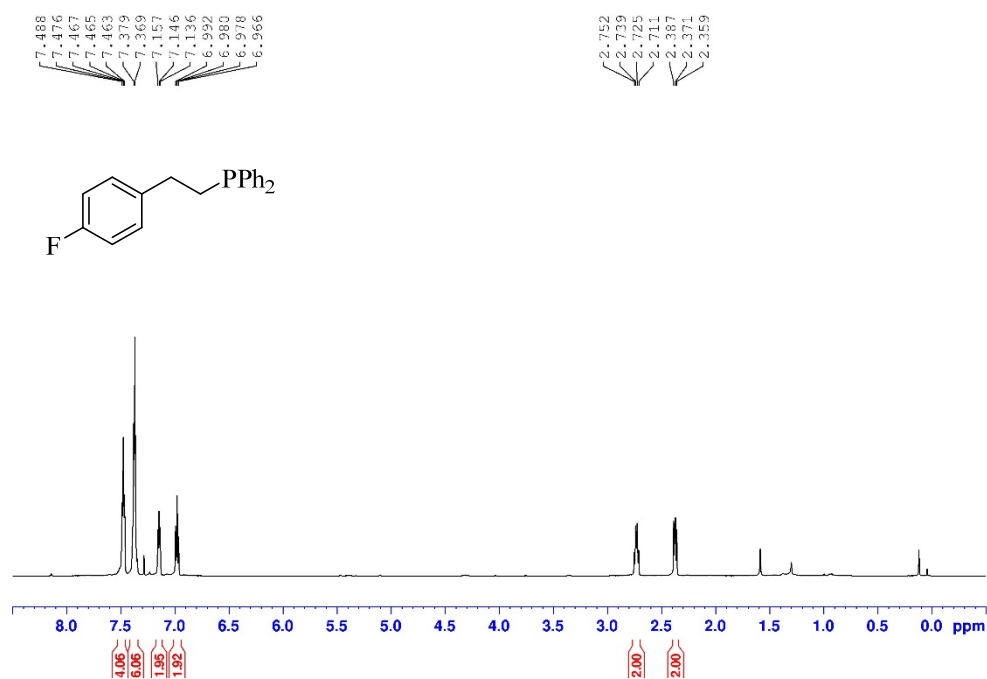

Figure S71.  $^1\text{H}$  NMR spectrum of compound 4k

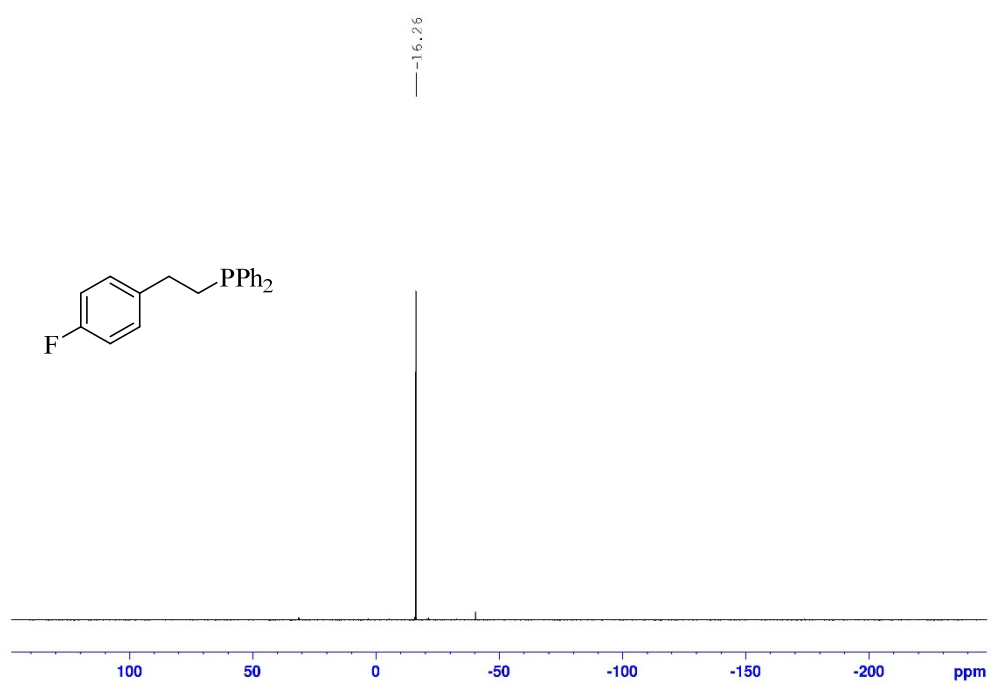

**Figure S72.** <sup>31</sup>P NMR spectrum of compound **4k**

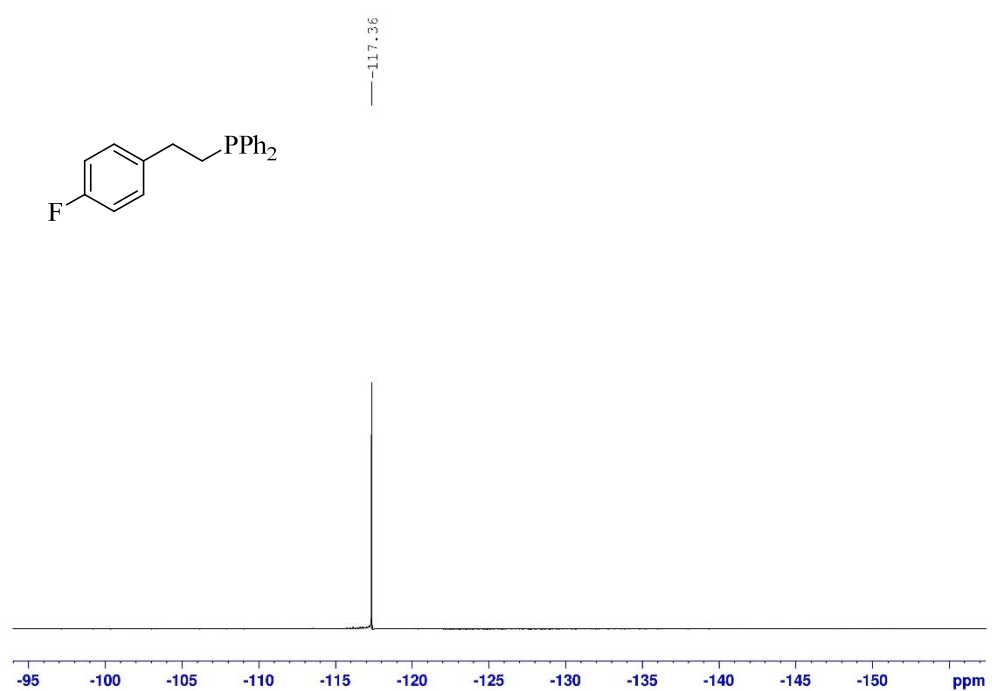

**Figure S73.** <sup>19</sup>F NMR spectrum of compound **4k**

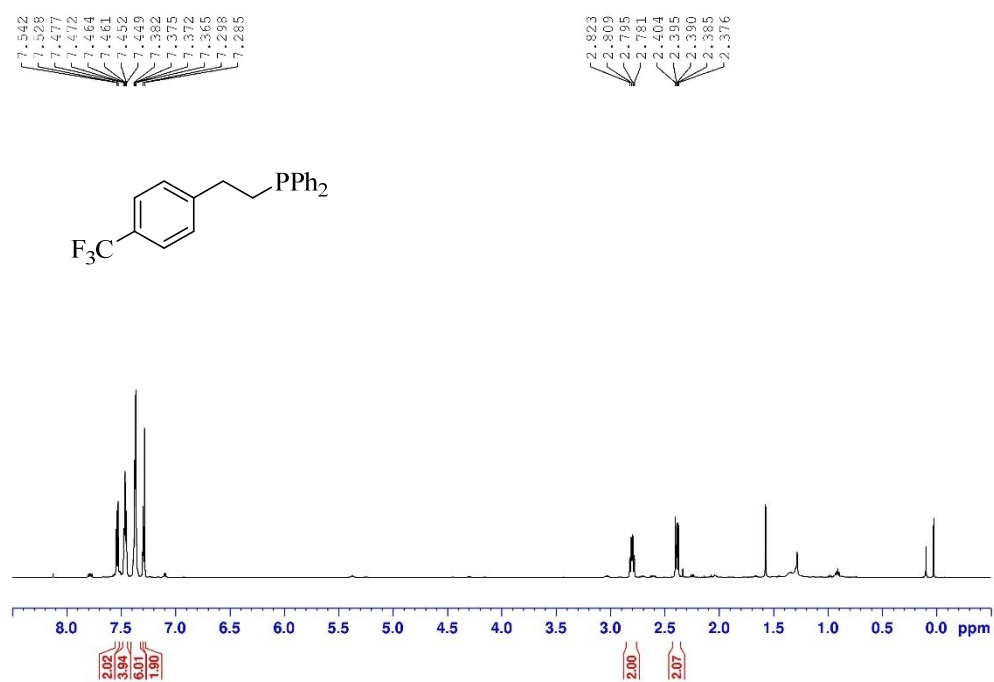

Figure S74. <sup>1</sup>H NMR spectrum of compound 4l

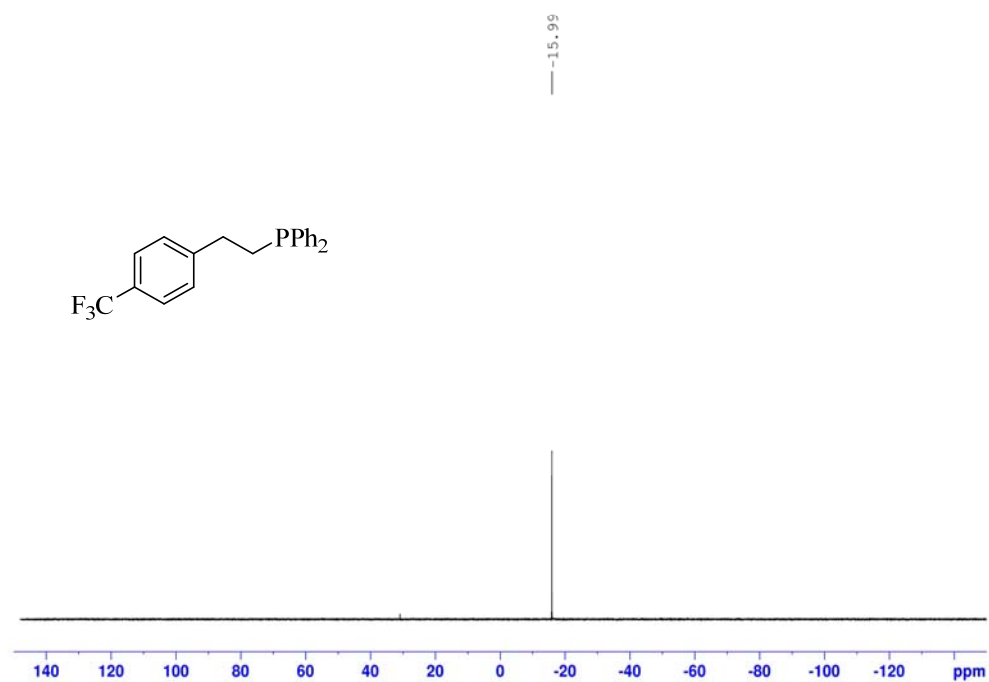

Figure S75. <sup>31</sup>P NMR spectrum of compound 4l

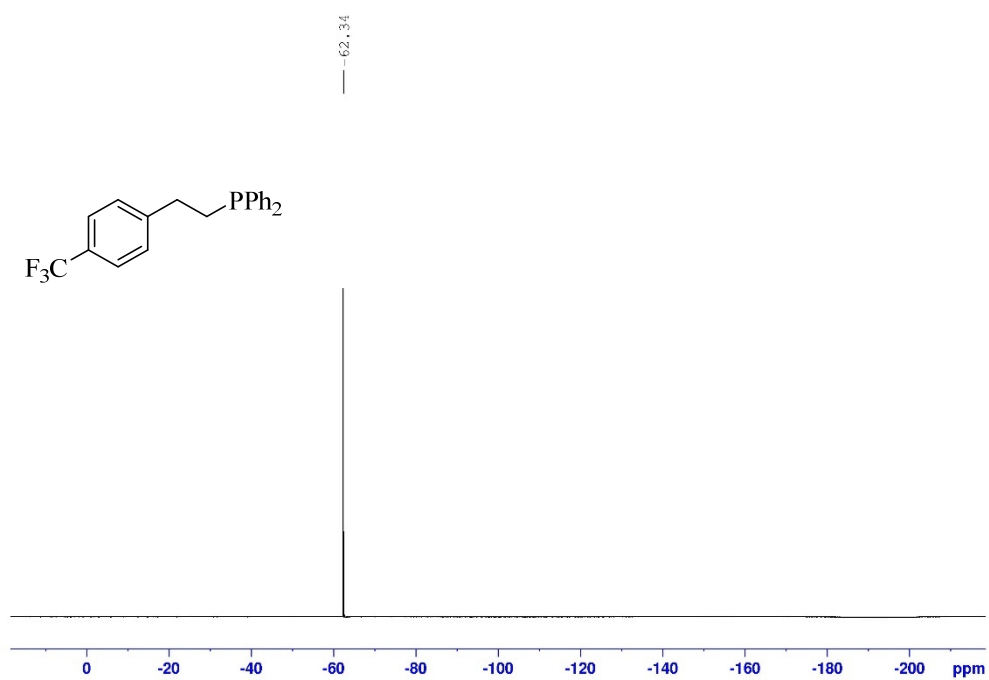

Figure S76.  $^{19}\text{F}$  NMR spectrum of compound 4l

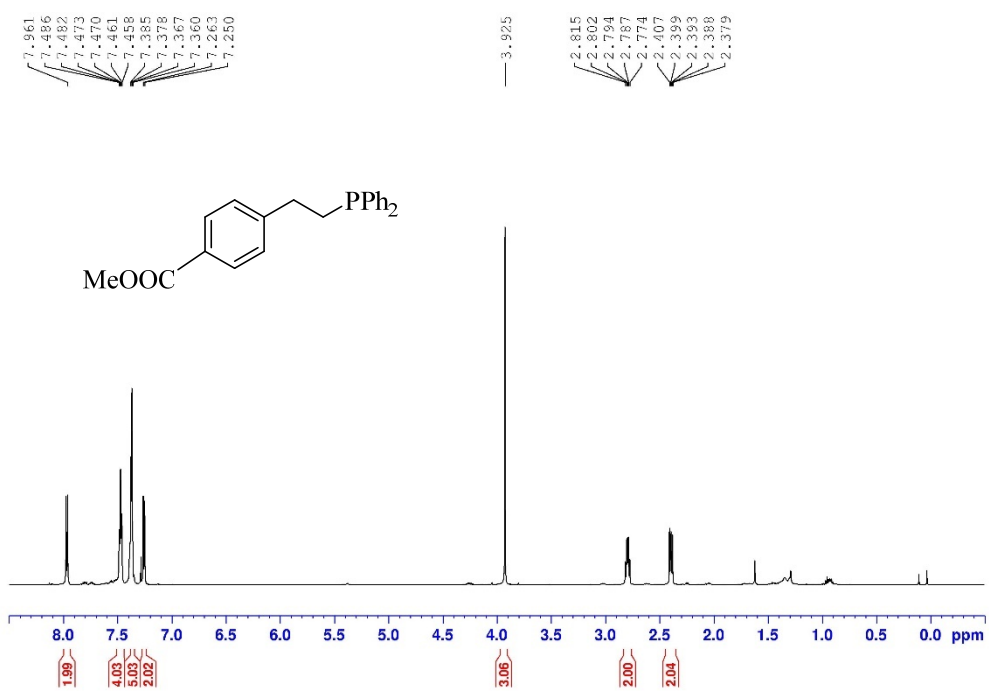

Figure S77.  $^1\text{H}$  NMR spectrum of compound 4m

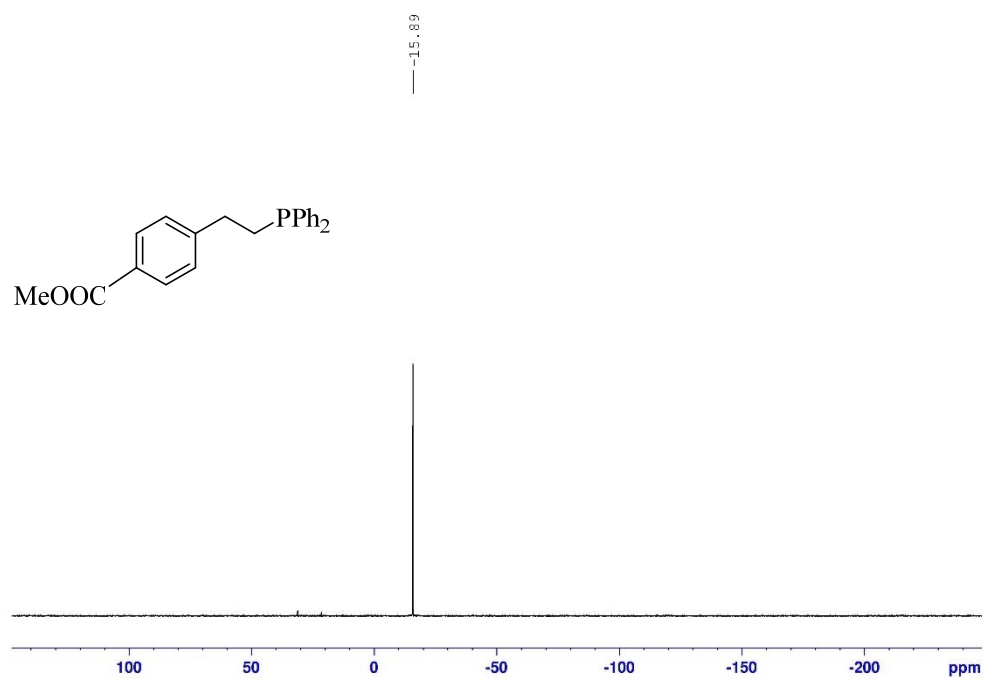

**Figure S78.**  $^{31}\text{P}$  NMR spectrum of compound **4m**

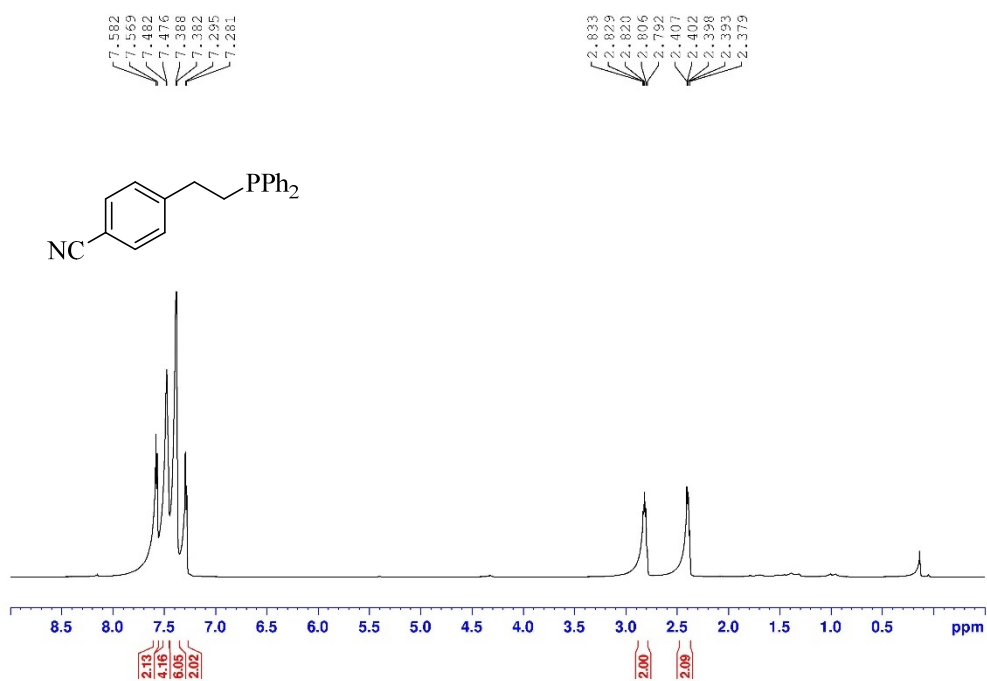

**Figure S79.**  $^1\text{H}$  NMR spectrum of compound **4n**

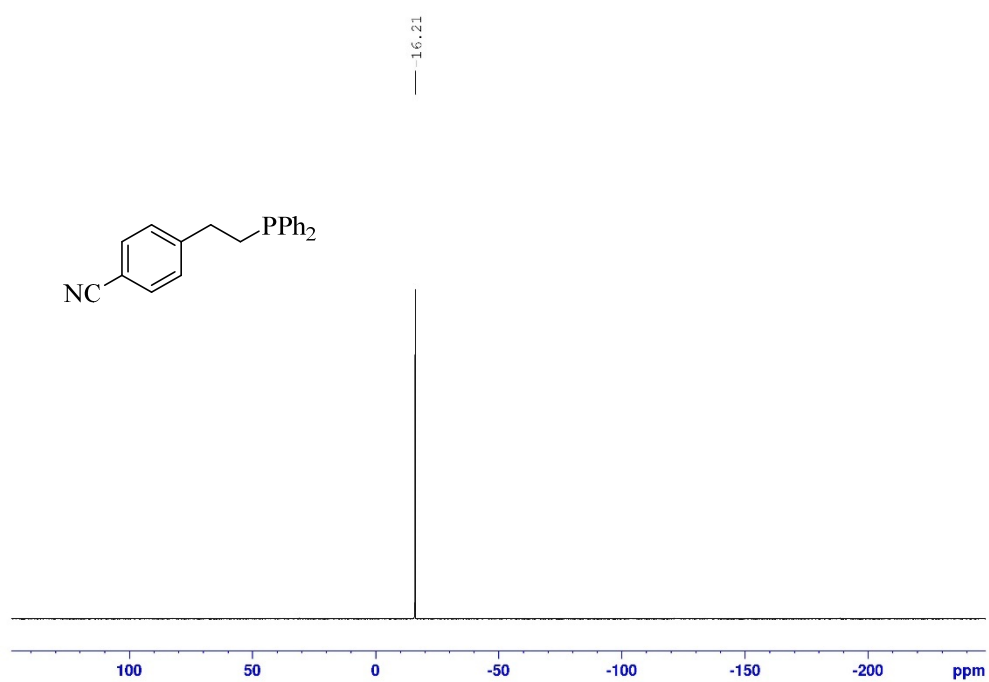

**Figure S80.**  $^{31}\text{P}$  NMR spectrum of compound **4n**

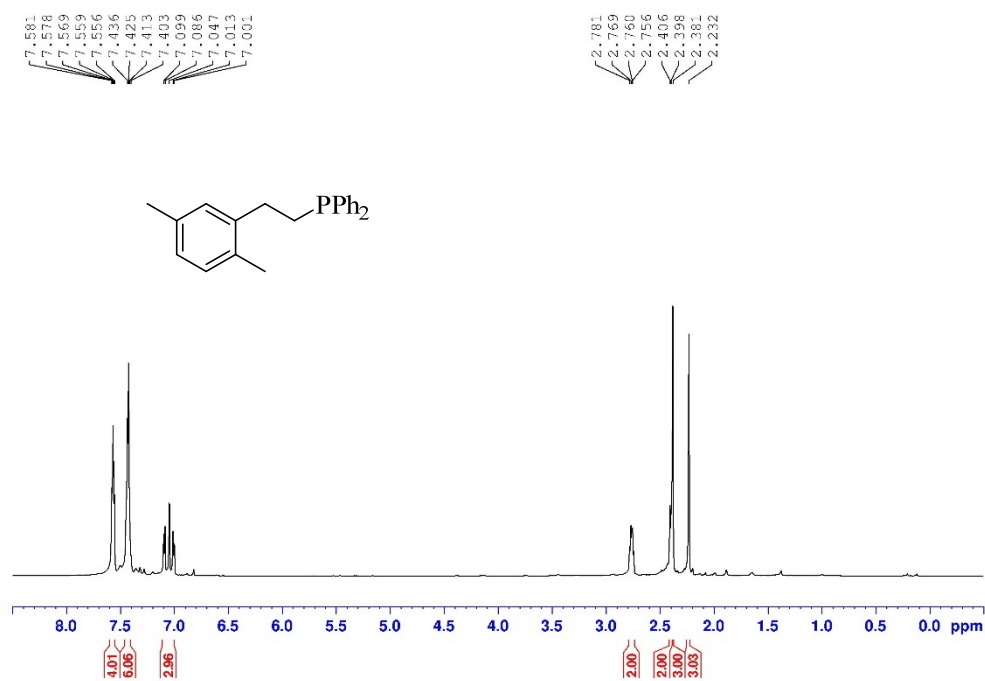

**Figure S81.**  $^1\text{H}$  NMR spectrum of compound **4o**

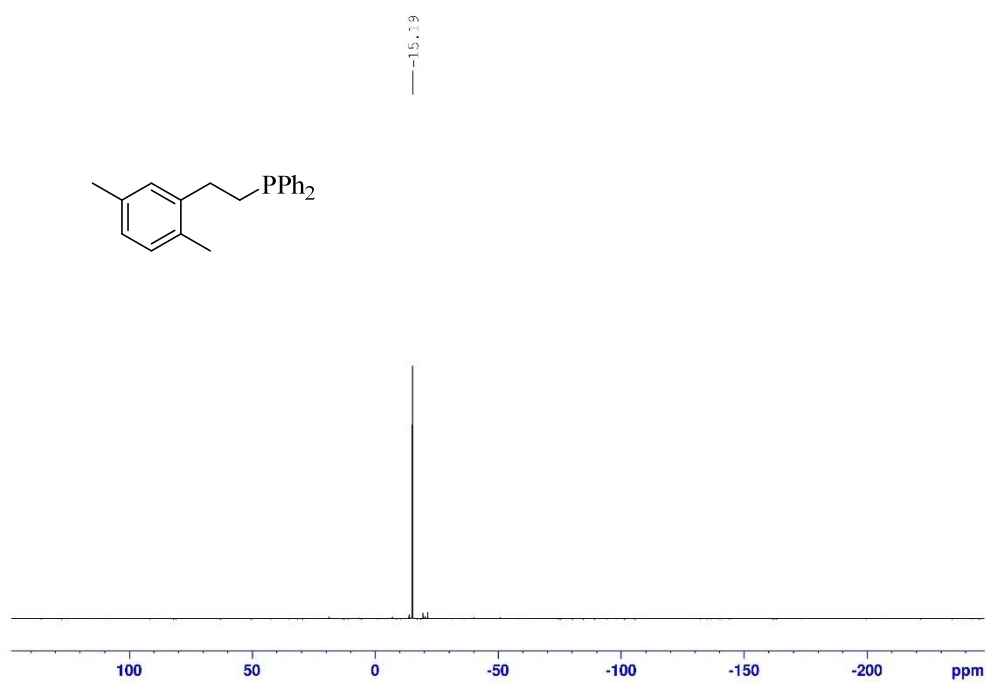

**Figure S82.**  $^{31}\text{P}$  NMR spectrum of compound **4o**

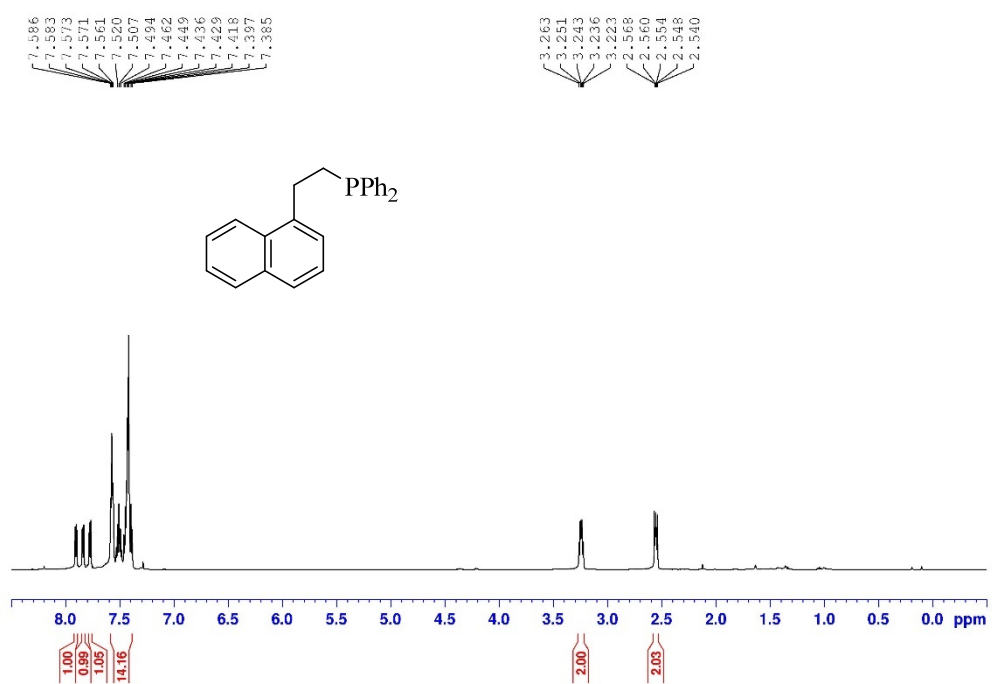

**Figure S83.**  $^1\text{H}$  NMR spectrum of compound **4p**



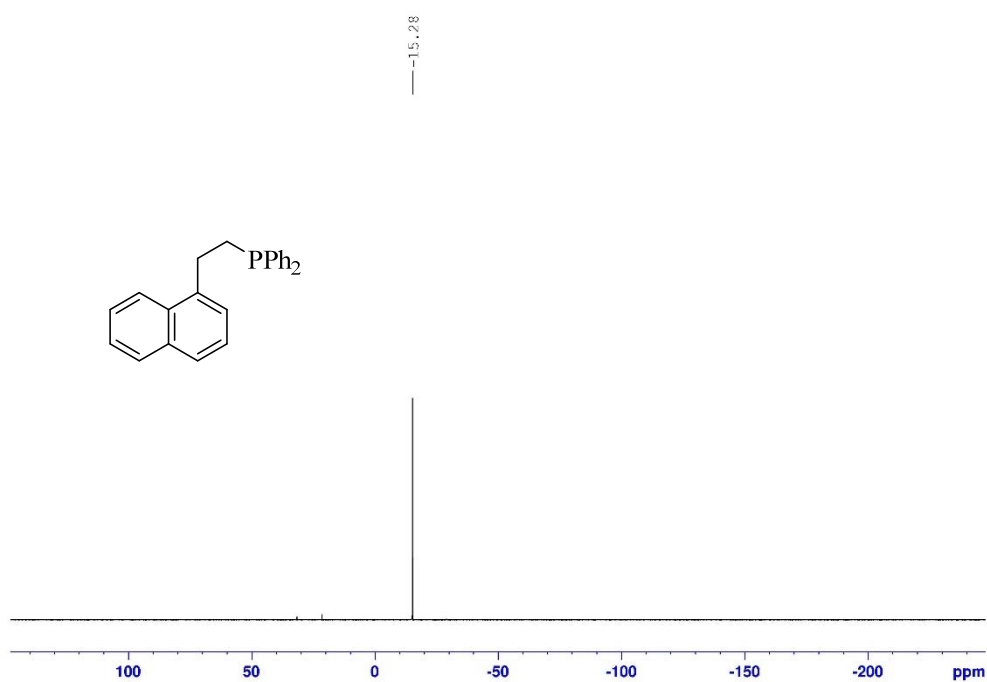

Figure S84.  $^{31}\text{P}$  NMR spectrum of compound **4p**

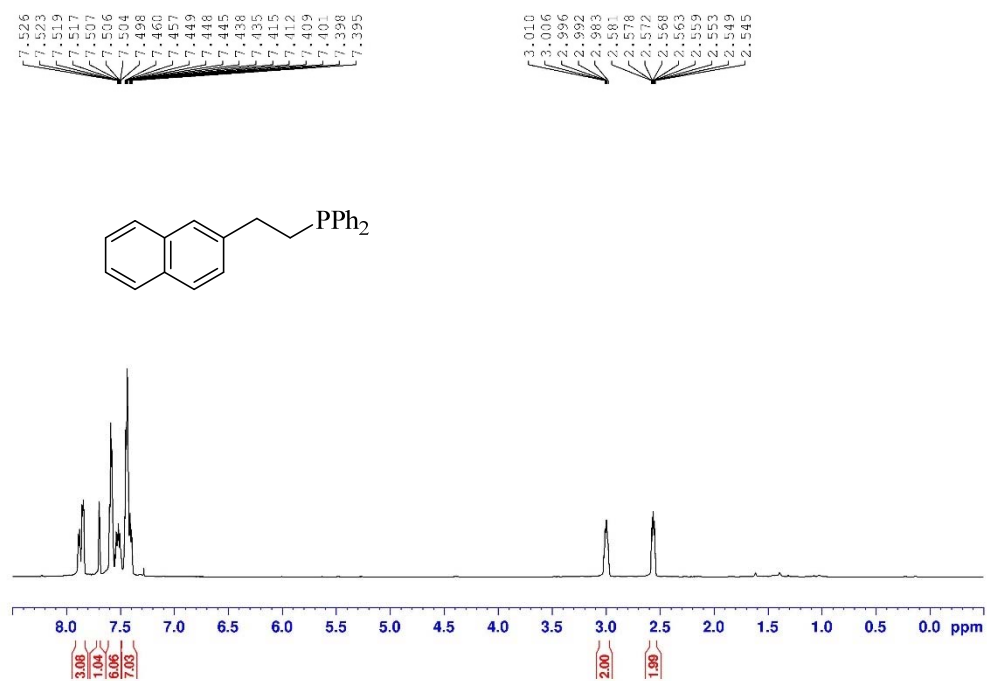

Figure S85.  $^1\text{H}$  NMR spectrum of compound **4q**

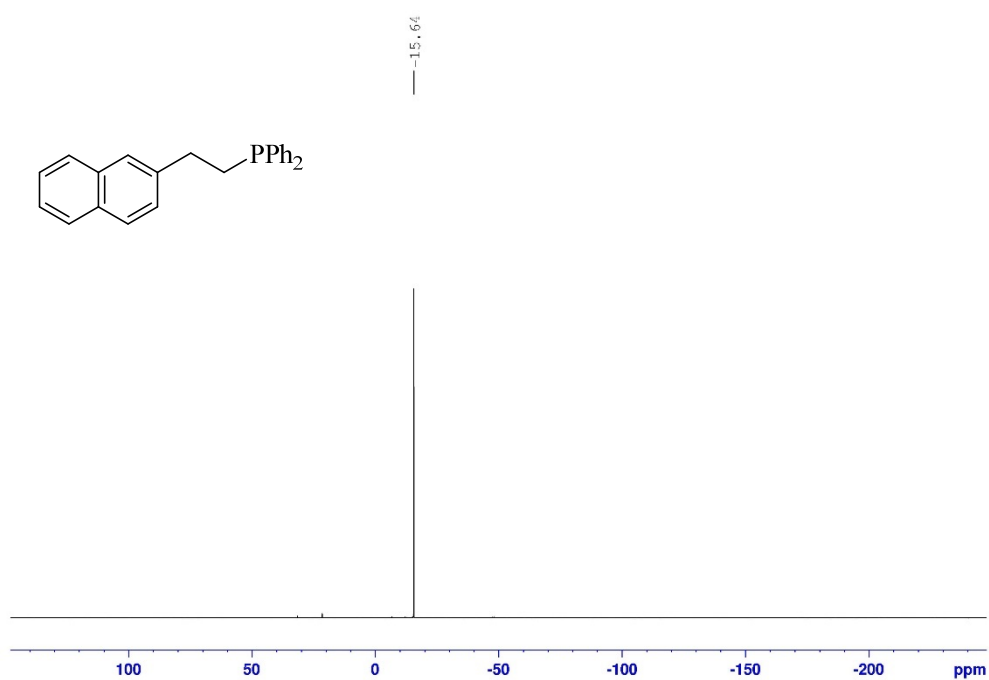

**Figure S86.**  $^{31}\text{P}$  NMR spectrum of compound **4q**

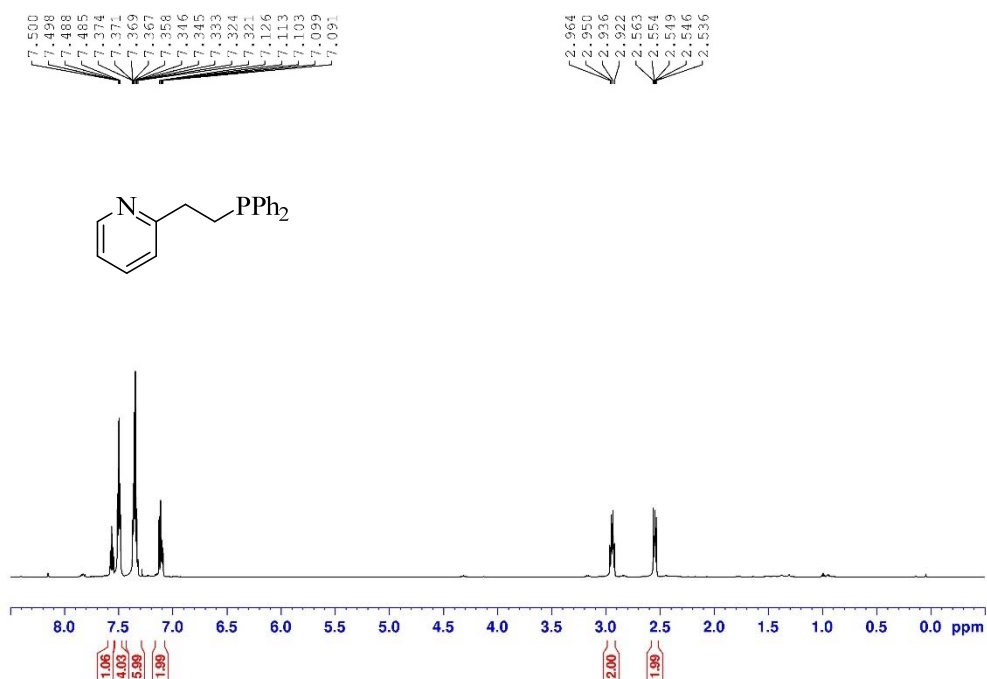

**Figure S87.**  $^1\text{H}$  NMR spectrum of compound **4r**

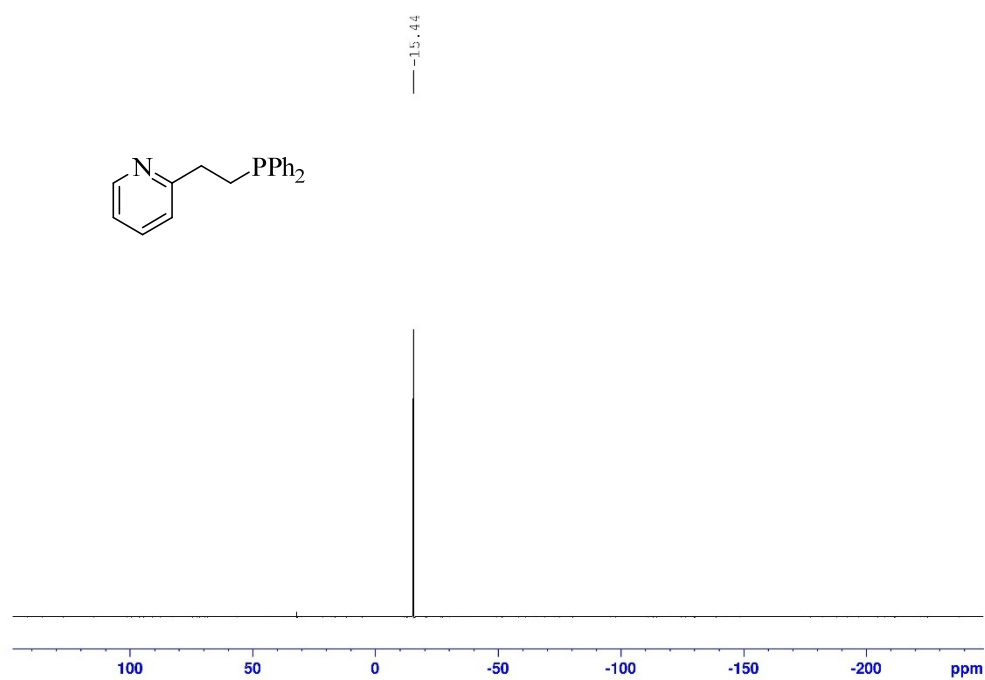

Figure S88.  $^{31}\text{P}$  NMR spectrum of compound 4r

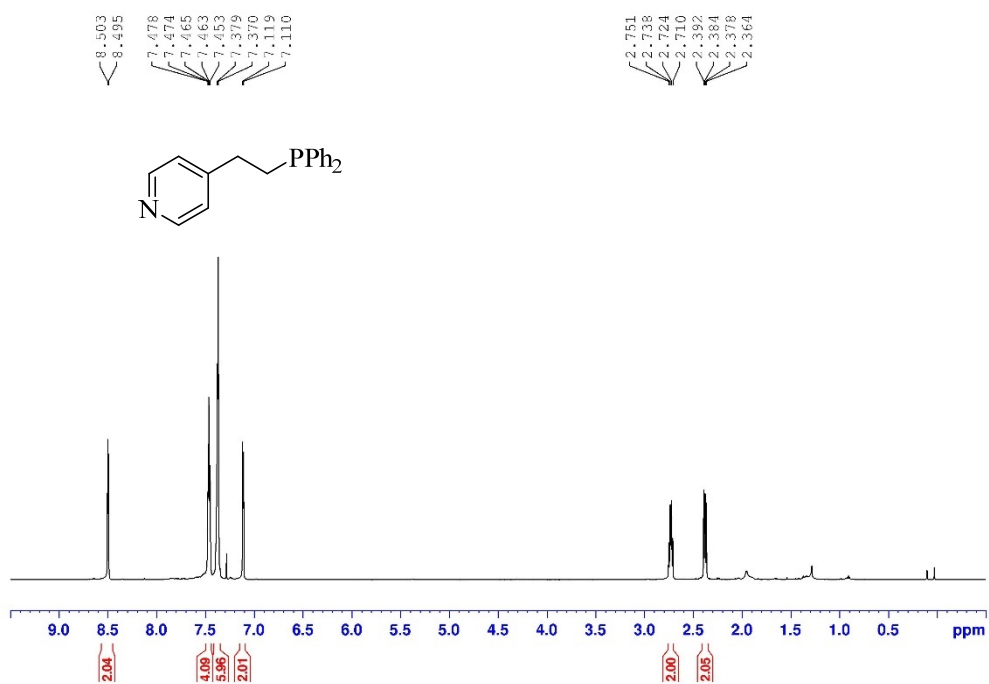

Figure S89.  $^1\text{H}$  NMR spectrum of compound 4s

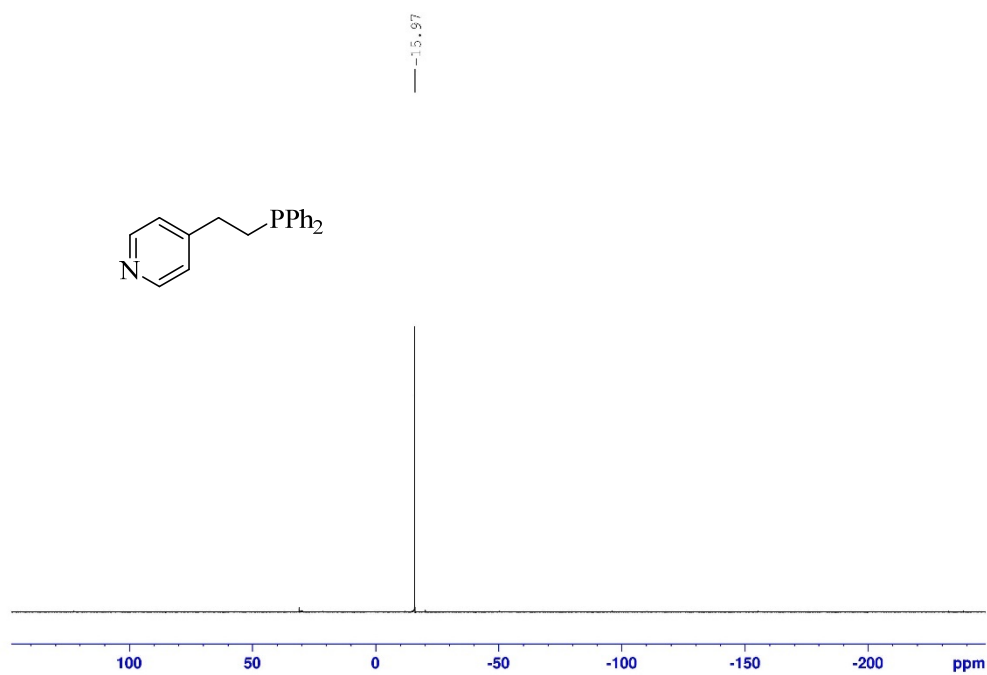

Figure S90.  $^{31}\text{P}$  NMR spectrum of compound 4s

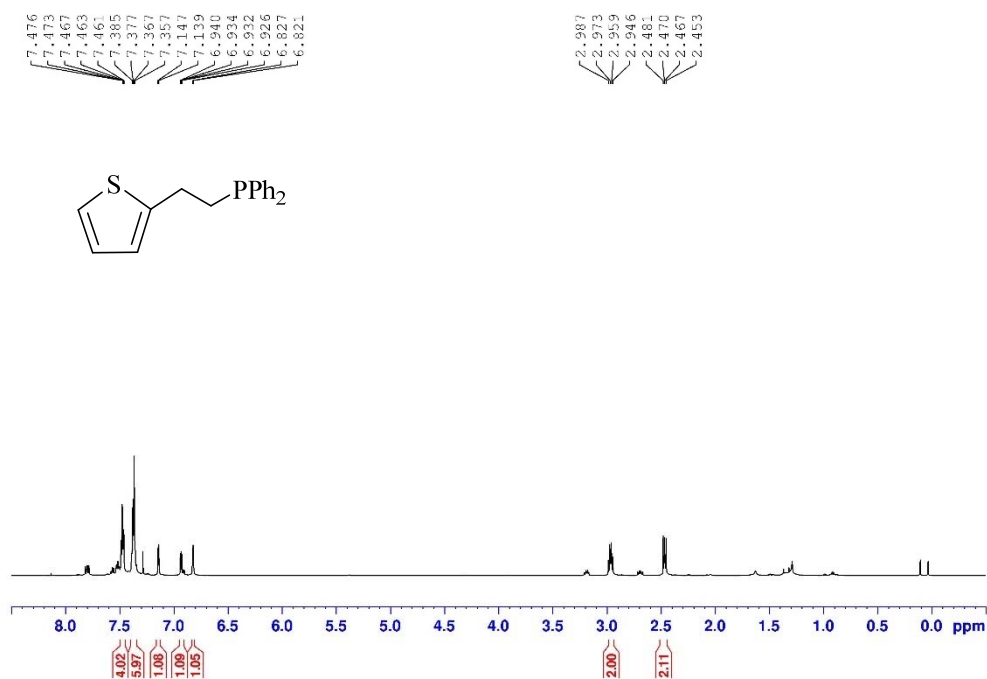

Figure S91.  $^1\text{H}$  NMR spectrum of compound 4t

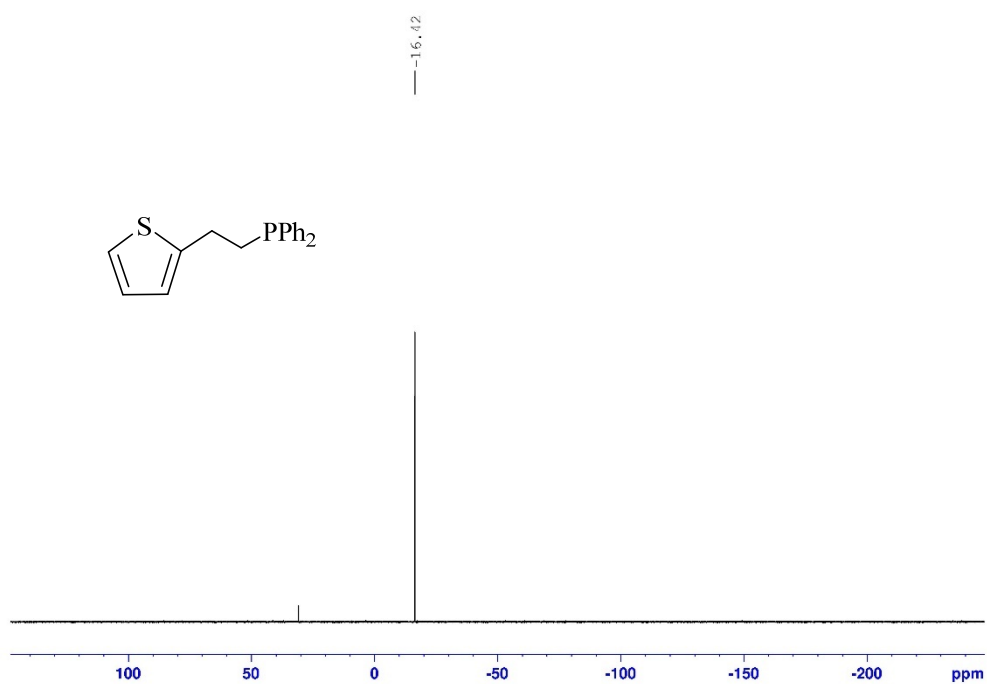

**Figure S92.**  $^{31}\text{P}$  NMR spectrum of compound **4t**

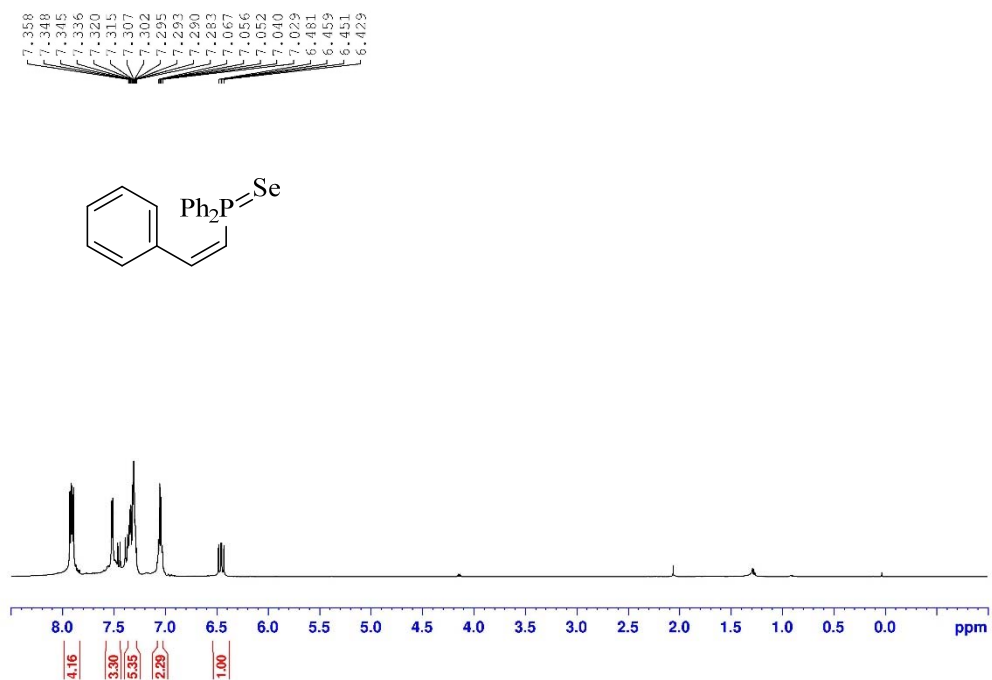

**Figure S93.**  $^1\text{H}$  NMR spectrum of compound **2a-Se**

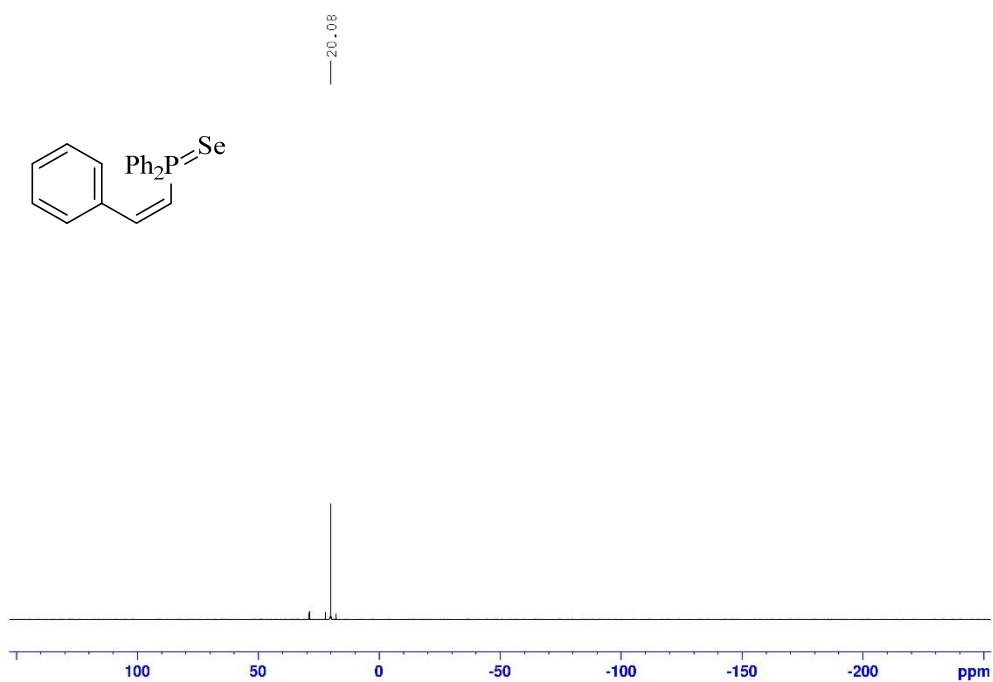

**Figure S94.**  $^{31}\text{P}$  NMR spectrum of compound **2a-Se**

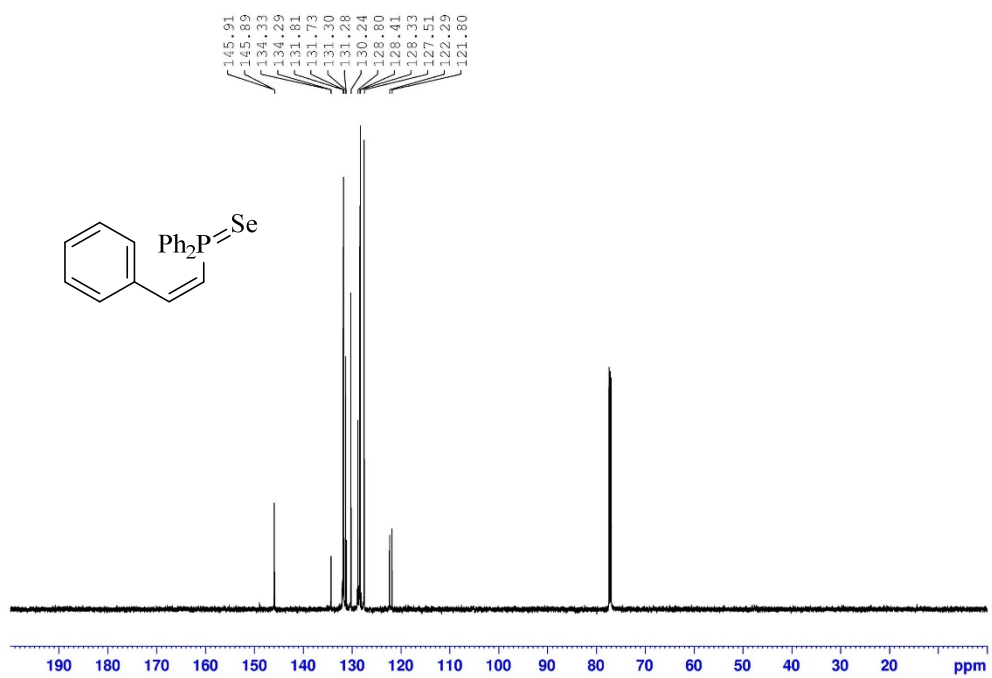

**Figure S95.**  $^{13}\text{C}$  NMR spectrum of compound **2a-Se**

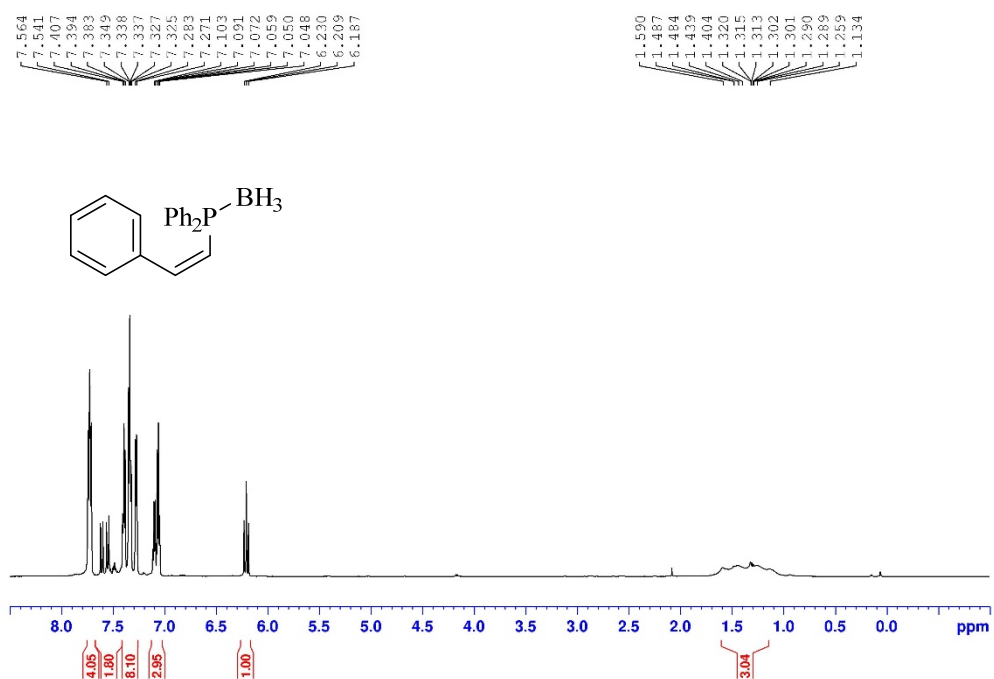

**Figure S96.** <sup>1</sup>H NMR spectrum of compound **2a-BH<sub>3</sub>**

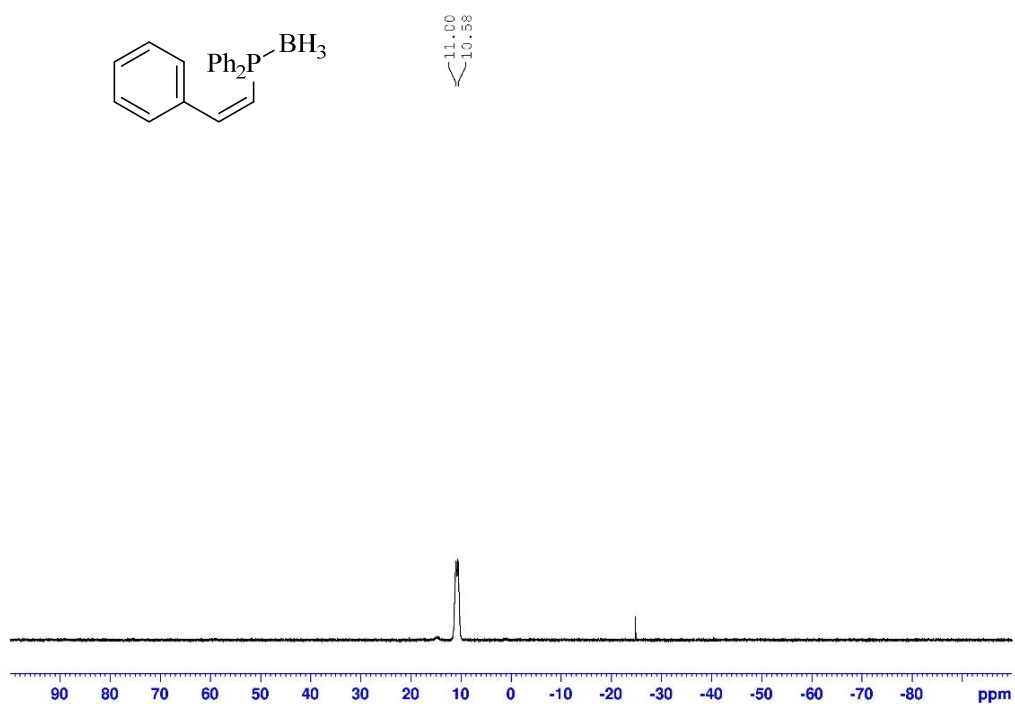

**Figure S97.** <sup>31</sup>P NMR spectrum of compound **2a-BH<sub>3</sub>**

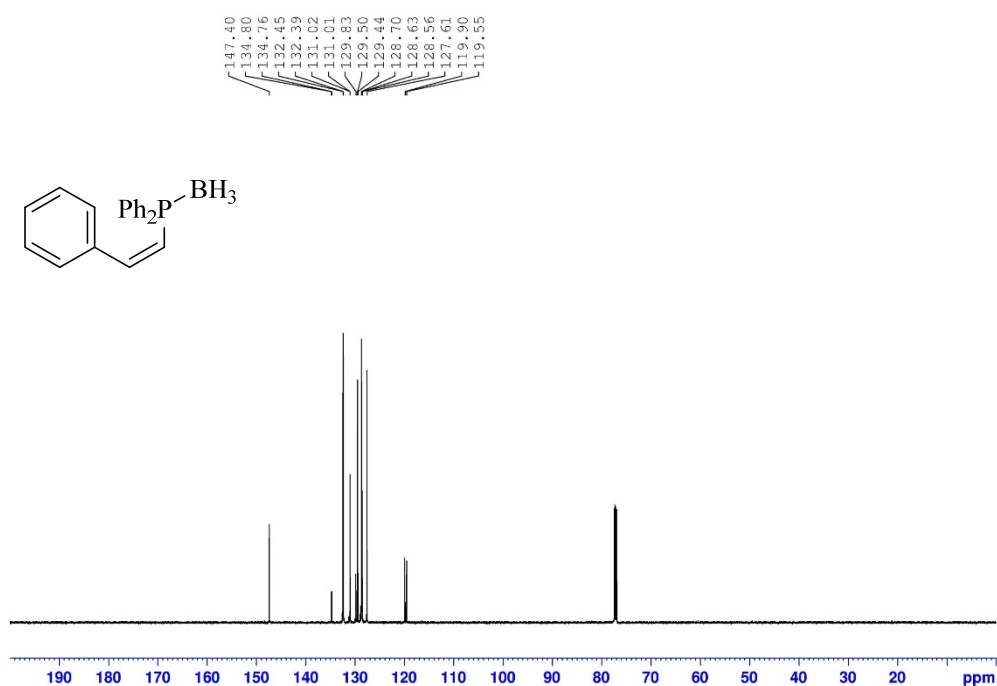

Figure S98. <sup>13</sup>C NMR spectrum of compound **2a-BH<sub>3</sub>**

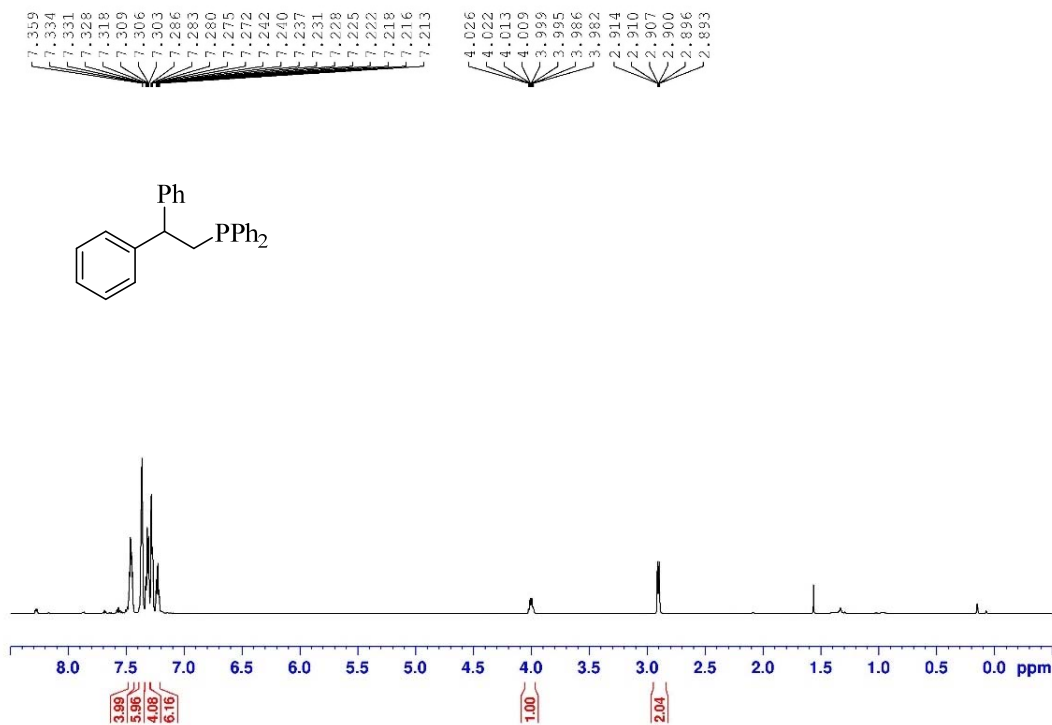

Figure S99. <sup>1</sup>H NMR spectrum of compound **2u**



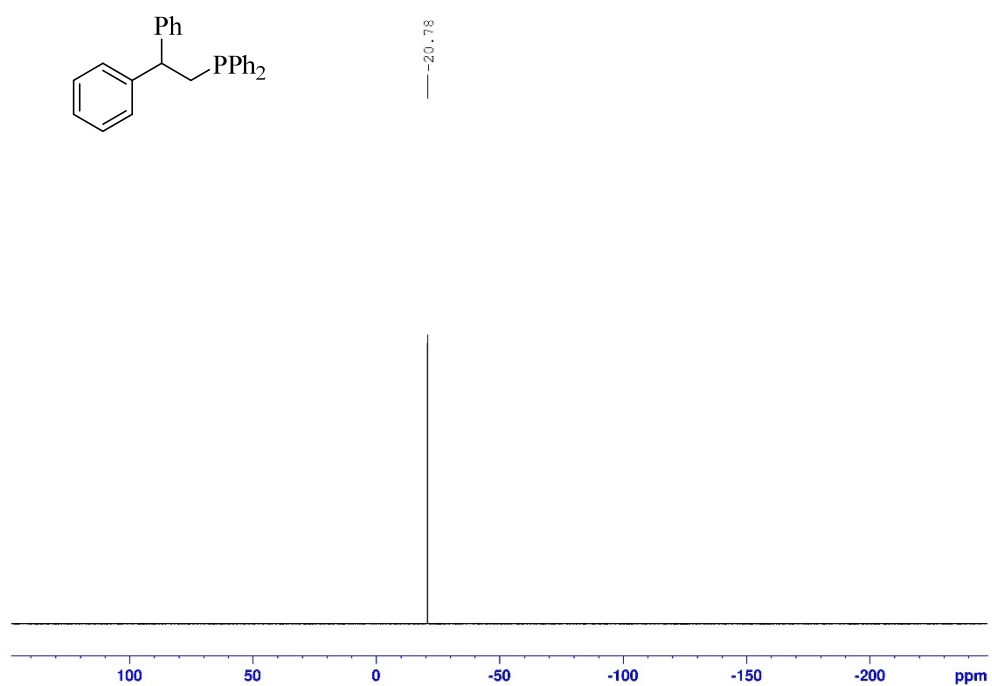

**Figure S100.**  $^{31}\text{P}$  NMR spectrum of compound **2u**

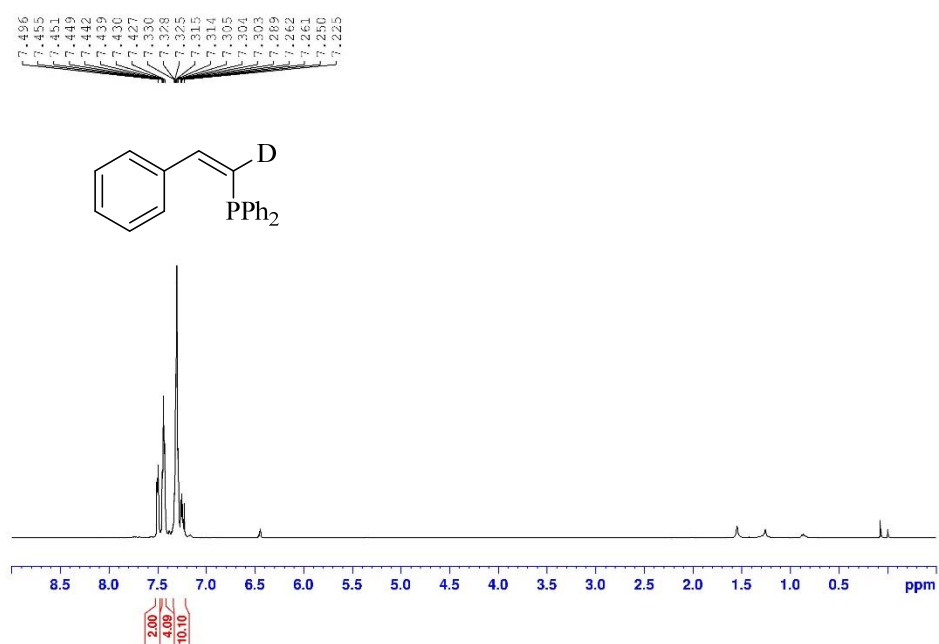

**Figure S101.**  $^1\text{H}$  NMR spectrum of compound **2a-D**

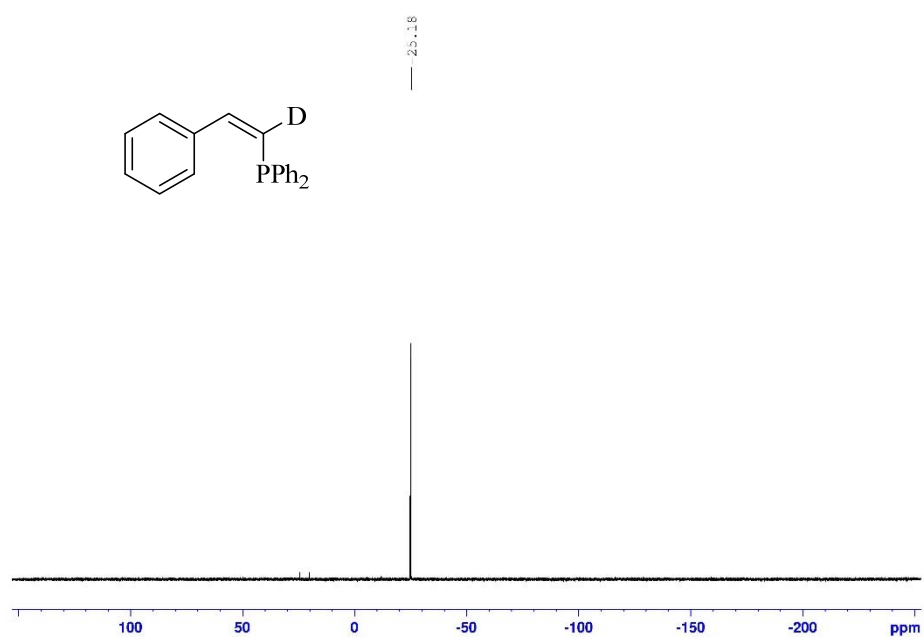

**Figure S102.**  $^{31}\text{P}$  NMR spectrum of compound **2a-D**

## 11. References

- [1] Y. Moglie, M. J. González-Soria, I. Martín-García, G. Radivoy and F. Alonso, *Green Chem.*, 2016, **18**, 4896–4907.
- [2] B. L. Réant and M. Mehta, *Organometallics*, 2024, **43**, 395–401.
- [3] M. M. Basiouny, D. A. Dollard and J. A. Schmidt, *Acs Catal.*, 2019, **9**, 7143–7153.
- [4] M. Itazaki, S. Katsube, M. Kamitani and H. Nakazawa, *Chem Commun.*, 2016, **52**, 3163–3166.
- [5] M. P. Stevens, E. Spray, I. J. Vitorica-Yrezabal, K. Singh, V. M. Timmermann, L. Sotorrios, S. A. Macgregor and F. Ortu, *Dalton T.*, 2022, **51**, 11922–11936.
- [6] Q. Yuan, Z. Huang, W. Wu, D. Hong, S. Zhu, J. Wei, S. Zhou and S. Wang, *Dalton T.*, 2022, **51**, 17795–17803.
- [7] J. Yuan, H. Hu and C. Cui, *Chem-Eur J.*, 2016, **22**, 5778–5785.
- [8] M. A. Jalil and E. B. Hui, *Tetrahedron Lett.*, 2006, **47**, 1473–1475.
- [9] G. Zhang, H. He, X. Chen, S.-F. Ni and R. Zeng, *Org Lett.*, 2023, **25**, 5356–5360.
- [10] C. R. Woof, T. G. Linford-Wood, M. F. Mahon and R. L. Webster, *Synthesis*, 2023, **55**, 927–933.
